# Supplementary material
Source: PubMed Central journal article supplement (PMC2535800)

# Enantioselective Total Synthesis of Batzelladine

## F and Definition of Its Structure

*Frederick Cohen and Larry Overman\**

**Supporting Information Part 2 (47 Pages)**

**E.  $^1\text{H}$  and  $^{13}\text{C}$  NMR of new compounds: Pages S21–S67**

<sup>13</sup>C spectrum with <sup>1</sup>H decoupling

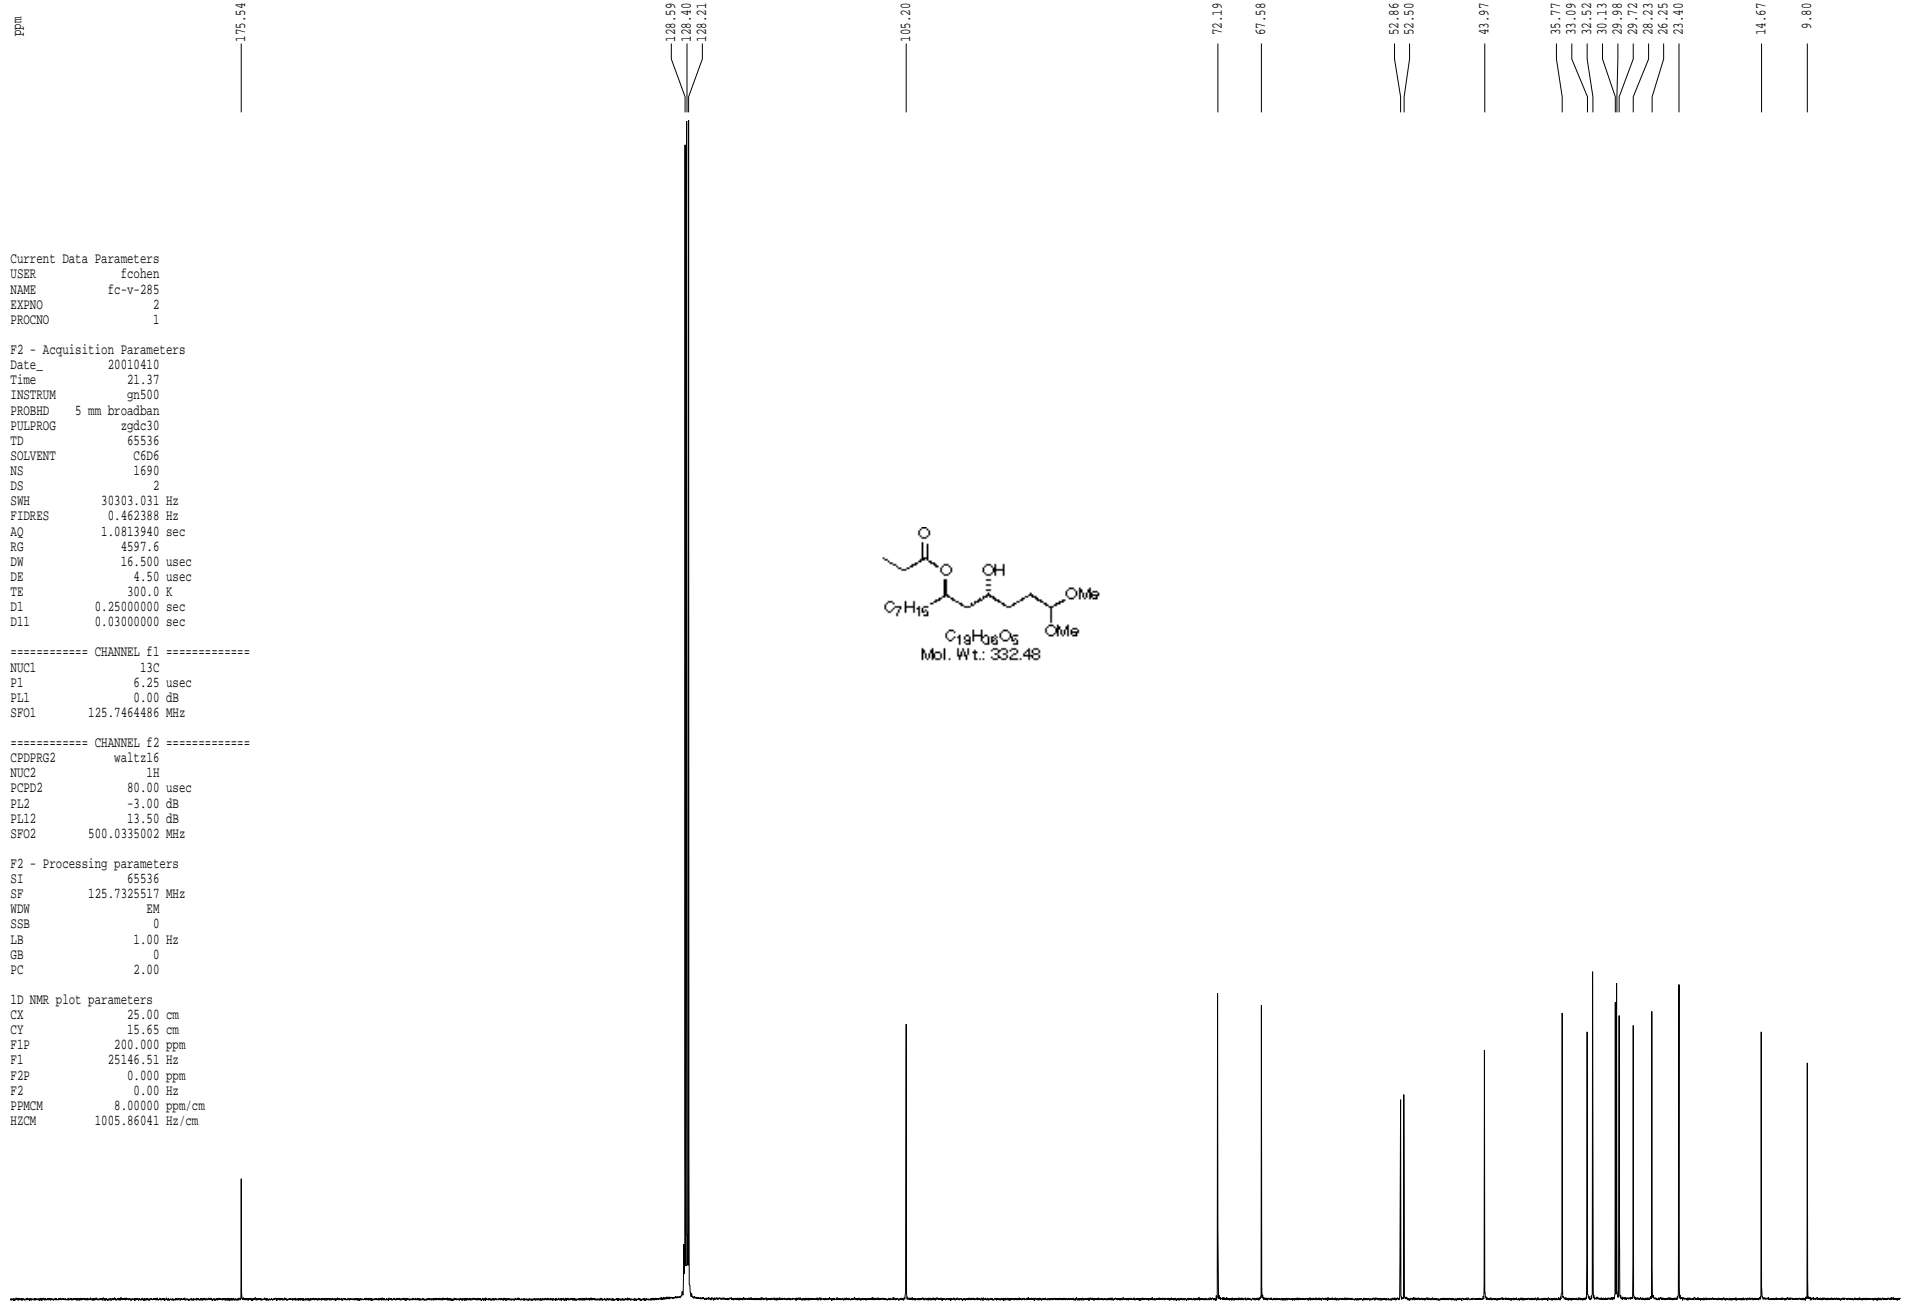

Current Data Parameters  
USER fcohen  
NAME fc-v-285  
EXPNO 2  
PROCNO 1

F2 - Acquisition Parameters  
Date\_ 20010410  
Time 21.37  
INSTRUM gn500  
PROBHD 5 mm broadband  
PULPROG zgdc30  
TD 65536  
SOLVENT C6D6  
NS 1690  
DS 2  
SWH 30303.031 Hz  
FIDRES 0.462388 Hz  
AQ 1.0813940 sec  
RG 4597.6  
DW 16.500 usec  
DE 4.50 usec  
TE 300.0 K  
D1 0.25000000 sec  
D11 0.03000000 sec

==== CHANNEL f1 =====  
NUC1 13C  
P1 6.25 usec  
PL1 0.00 dB  
SFO1 125.7464486 MHz

==== CHANNEL f2 =====  
CPDPRG2 waltz16  
NUC2 1H  
PCPD2 80.00 usec  
PL2 -3.00 dB  
PL12 13.50 dB  
SFO2 500.0335002 MHz

F2 - Processing parameters  
SI 65536  
SF 125.7325517 MHz  
WDW EM  
SSB 0  
LB 1.00 Hz  
GB 0  
PC 2.00

1D NMR plot parameters  
CX 25.00 cm  
CY 15.65 cm  
FIP 200.000 ppm  
F1 25146.51 Hz  
F2P 0.000 ppm  
F2 0.00 Hz  
PPMCM 8.00000 ppm/cm  
HZCM 1005.86041 Hz/cm

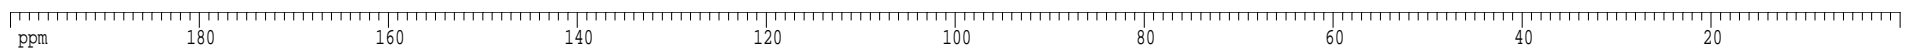

## 1H spectrum

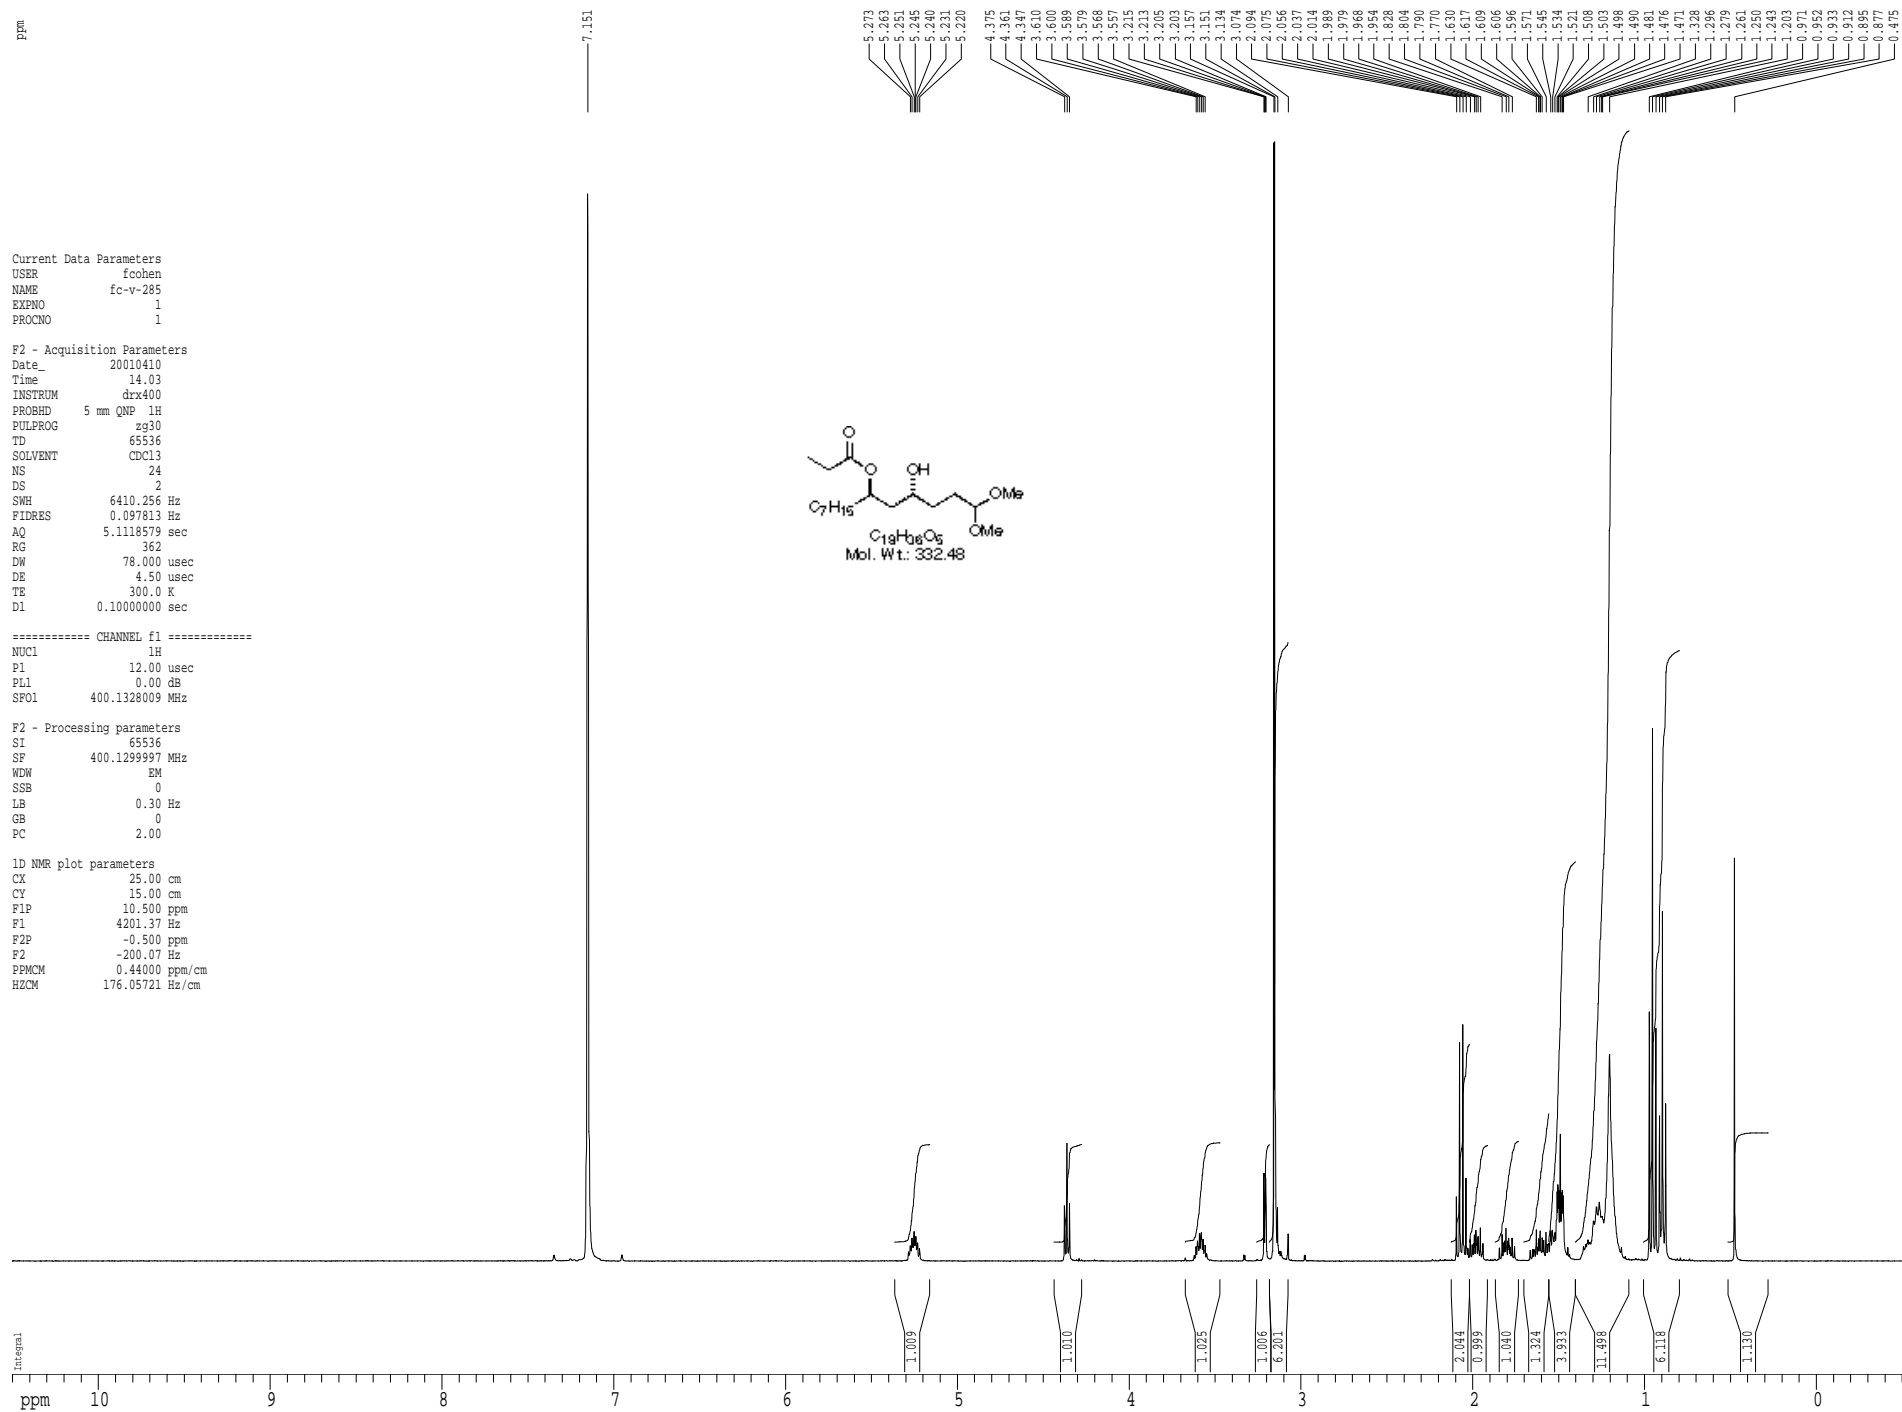

13C spectrum with 1H decoupling

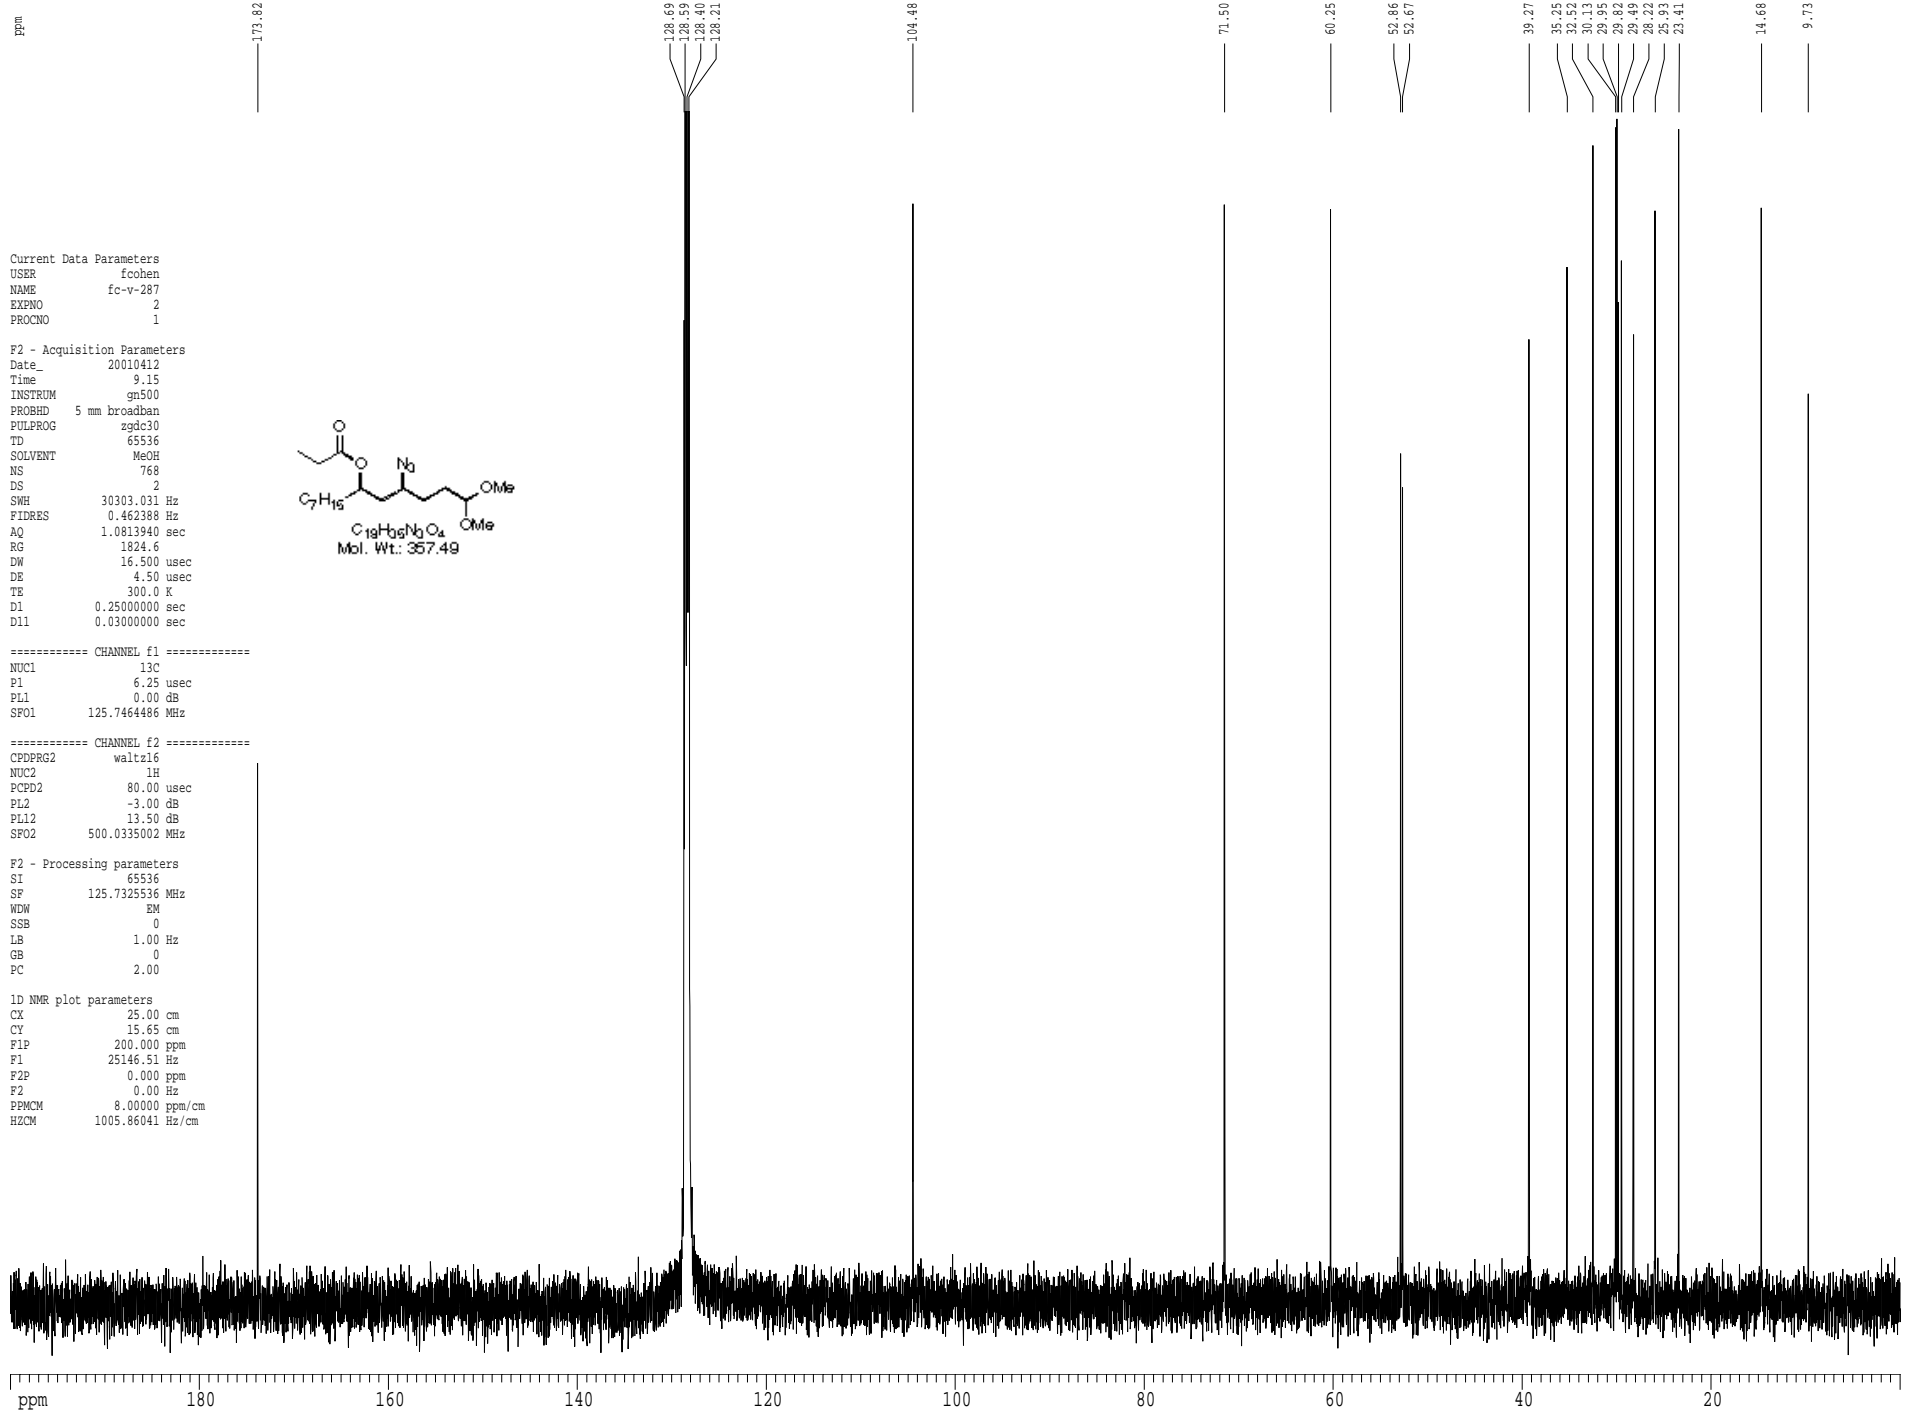

## 1H spectrum

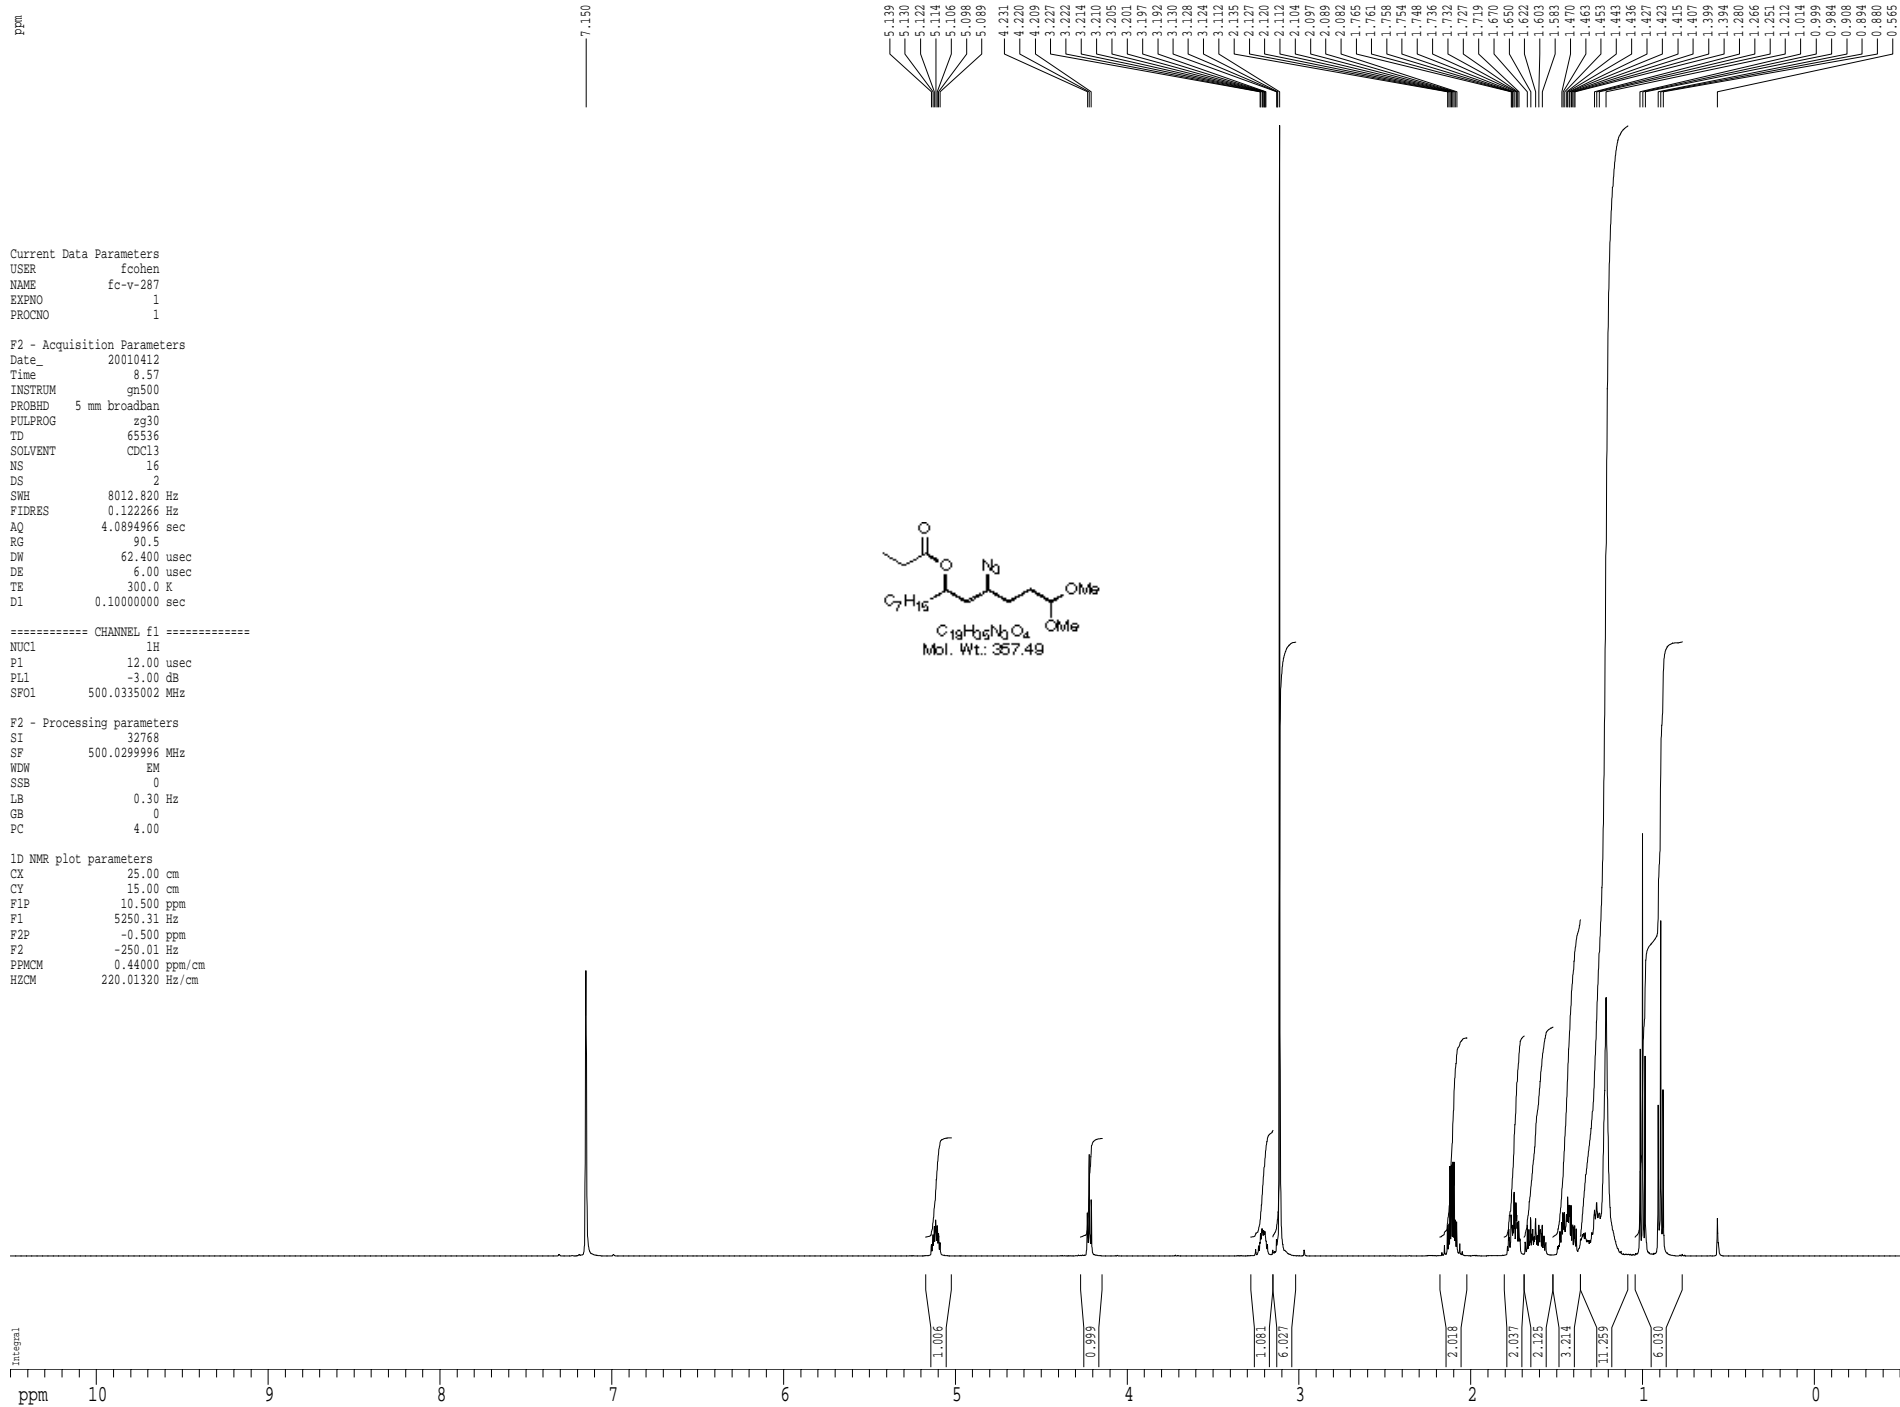

<sup>13</sup>C spectrum with <sup>1</sup>H decoupling

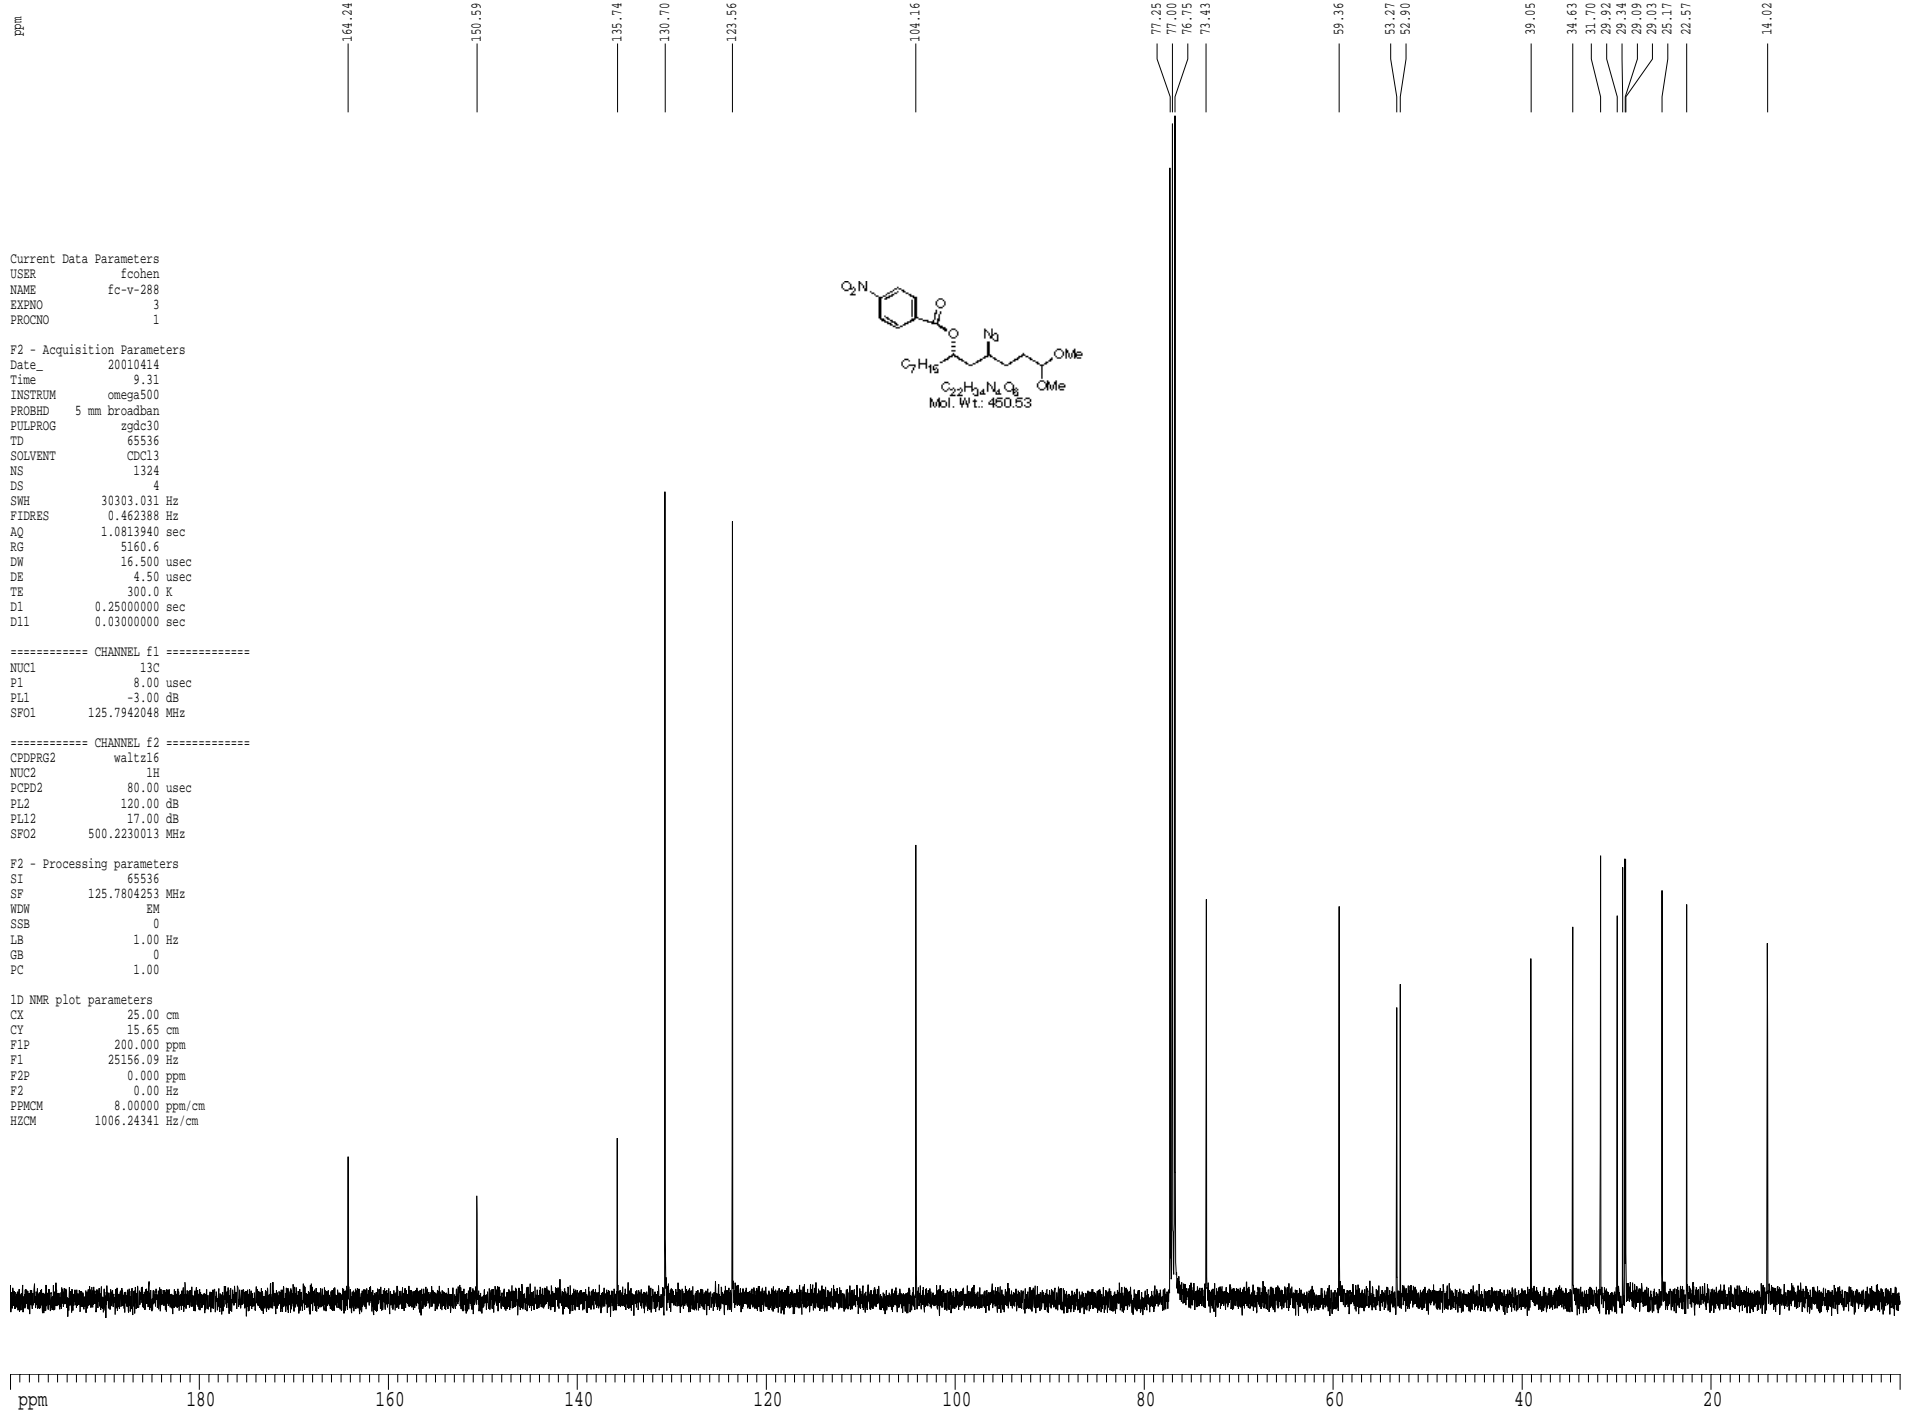

Current Data Parameters  
USER fcohen  
NAME fc-v-288  
EXPNO 3  
PROCNO 1

F2 - Acquisition Parameters  
Date\_ 20010414  
Time 9.31  
INSTRUM omega500  
PROBHD 5 mm broadband  
PULPROG zgdc30  
TD 65536  
SOLVENT CDCl3  
NS 1324  
DS 4  
SWH 30303.031 Hz  
FIDRES 0.462388 Hz  
AQ 1.0813940 sec  
RG 5160.6  
DW 16.500 usec  
DE 4.50 usec  
TE 300.0 K  
D1 0.25000000 sec  
D11 0.03000000 sec

==== CHANNEL f1 =====  
NUC1 13C  
P1 8.00 usec  
PL1 -3.00 dB  
SFO1 125.7942048 MHz

==== CHANNEL f2 =====  
CPDPRG2 waltz16  
NUC2 1H  
PCPD2 90.00 usec  
PL2 120.00 dB  
PL12 17.00 dB  
SFO2 500.2230013 MHz

F2 - Processing parameters  
SI 65536  
SF 125.7804253 MHz  
WDW EM  
SSB 0  
LB 1.00 Hz  
GB 0  
PC 1.00

1D NMR plot parameters  
CX 25.00 cm  
CY 15.65 cm  
FIP 200.000 ppm  
F1 25156.09 Hz  
F2P 0.000 ppm  
F2 0.00 Hz  
PPMCM 8.00000 ppm/cm  
HZCM 1006.24341 Hz/cm

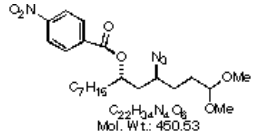

<sup>1</sup>H spectrum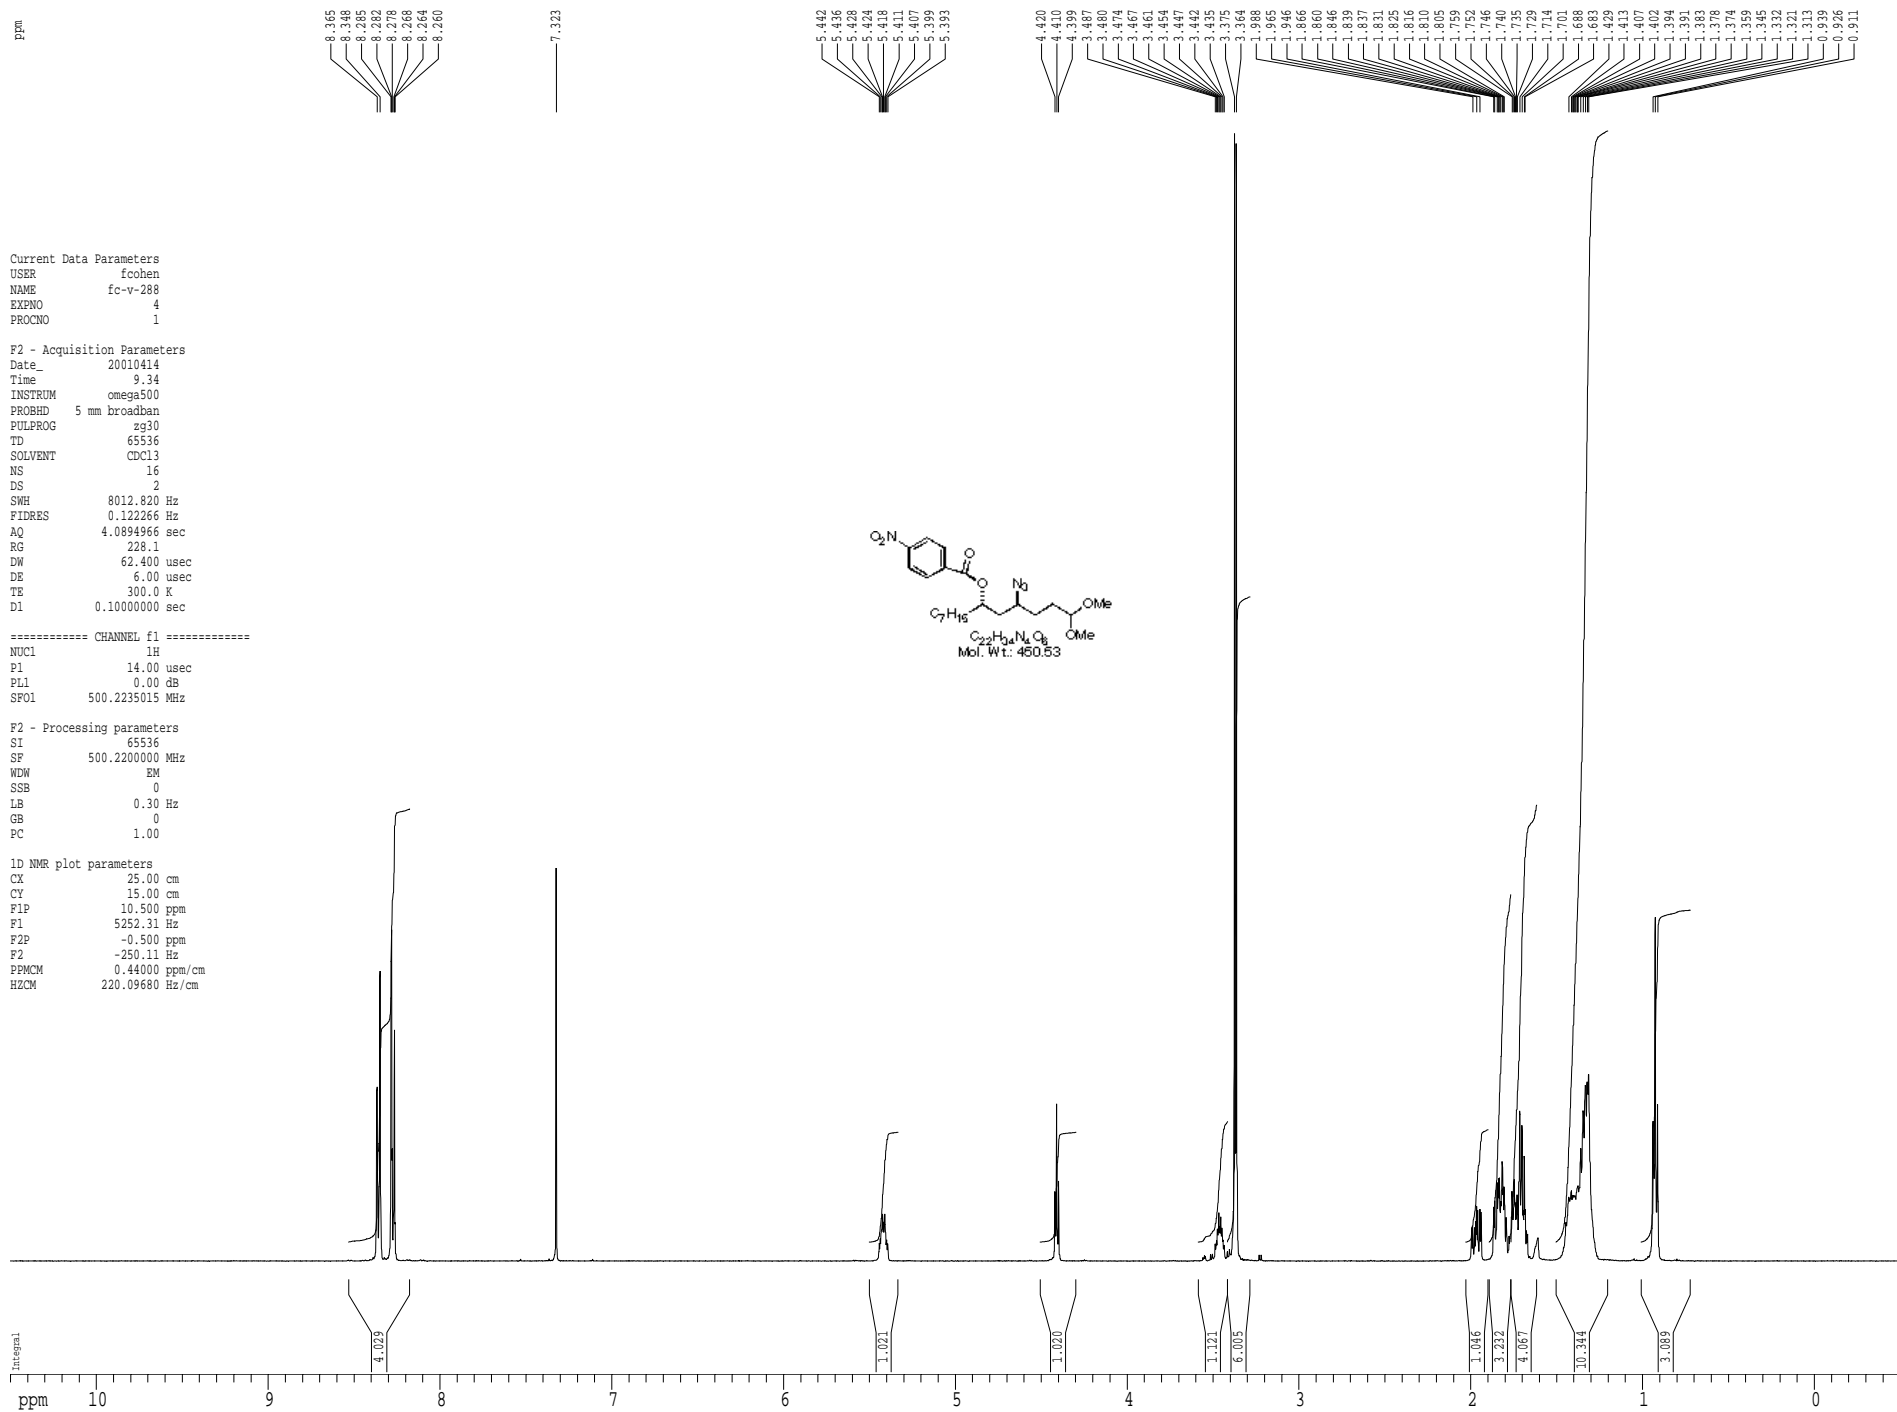

<sup>13</sup>C spectrum with <sup>1</sup>H decoupling

ppm

Current Data Parameters  
 USER fcohen  
 NAME fc-v-289  
 EXPNO 2  
 PROCNO 1

F2 - Acquisition Parameters  
 Date\_ 20010414  
 Time 14.04  
 INSTRUM omega500  
 PROBHD 5 mm broadband  
 PULPROG zgdc30  
 TD 65536  
 SOLVENT CDCl3  
 NS 1292  
 DS 4  
 SWH 30303.031 Hz  
 FIDRES 0.462388 Hz  
 AQ 1.0813940 sec  
 RG 3251  
 DW 16.500 usec  
 DE 4.500 usec  
 TE 300.0 K  
 D1 0.25000000 sec  
 D11 0.03000000 sec

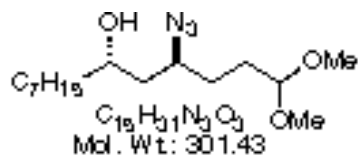

===== CHANNEL f1 =====  
 NUC1 13C  
 P1 8.00 usec  
 PL1 -3.00 dB  
 SFO1 125.7942048 MHz

===== CHANNEL f2 =====  
 CPDPRG2 waltz16  
 NUC2 1H  
 PCPD2 90.00 usec  
 PL2 120.00 dB  
 PL12 17.00 dB  
 SFO2 500.2230013 MHz

F2 - Processing parameters  
 SI 65536  
 SF 125.7804253 MHz  
 WDM EM  
 SSB 0  
 LB 1.00 Hz  
 GB 0  
 PC 1.00

1D NMR plot parameters  
 CX 25.00 cm  
 CY 15.65 cm  
 FID 200.000 ppm  
 F1 25156.09 Hz  
 F2P 0.000 ppm  
 F2 0.00 Hz  
 PPMCM 8.00000 ppm/cm  
 HZCM 1006.24341 Hz/cm

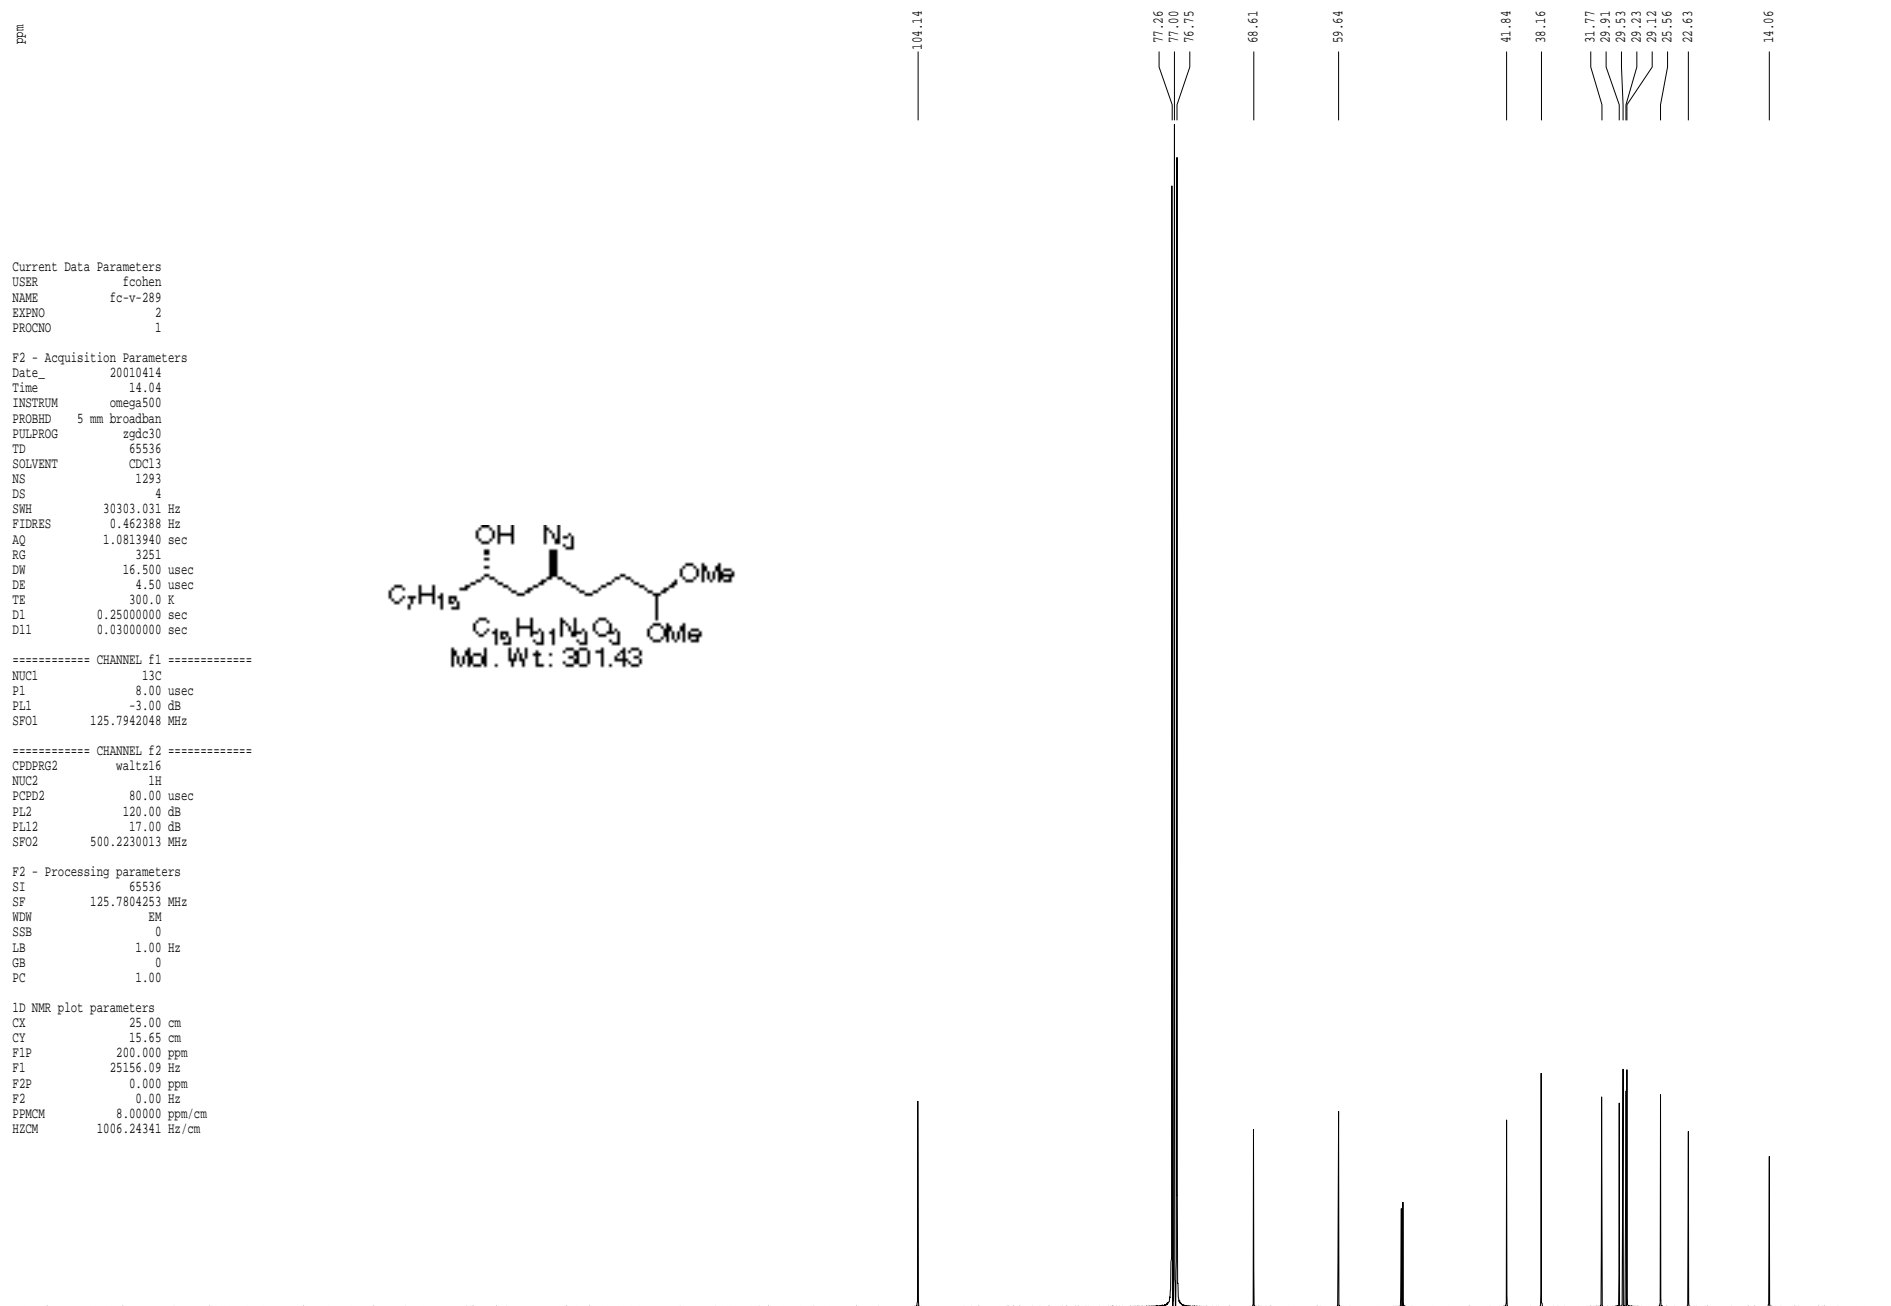

ppm 180 160 140 120 100 80 60 40 20



## 1H spectrum

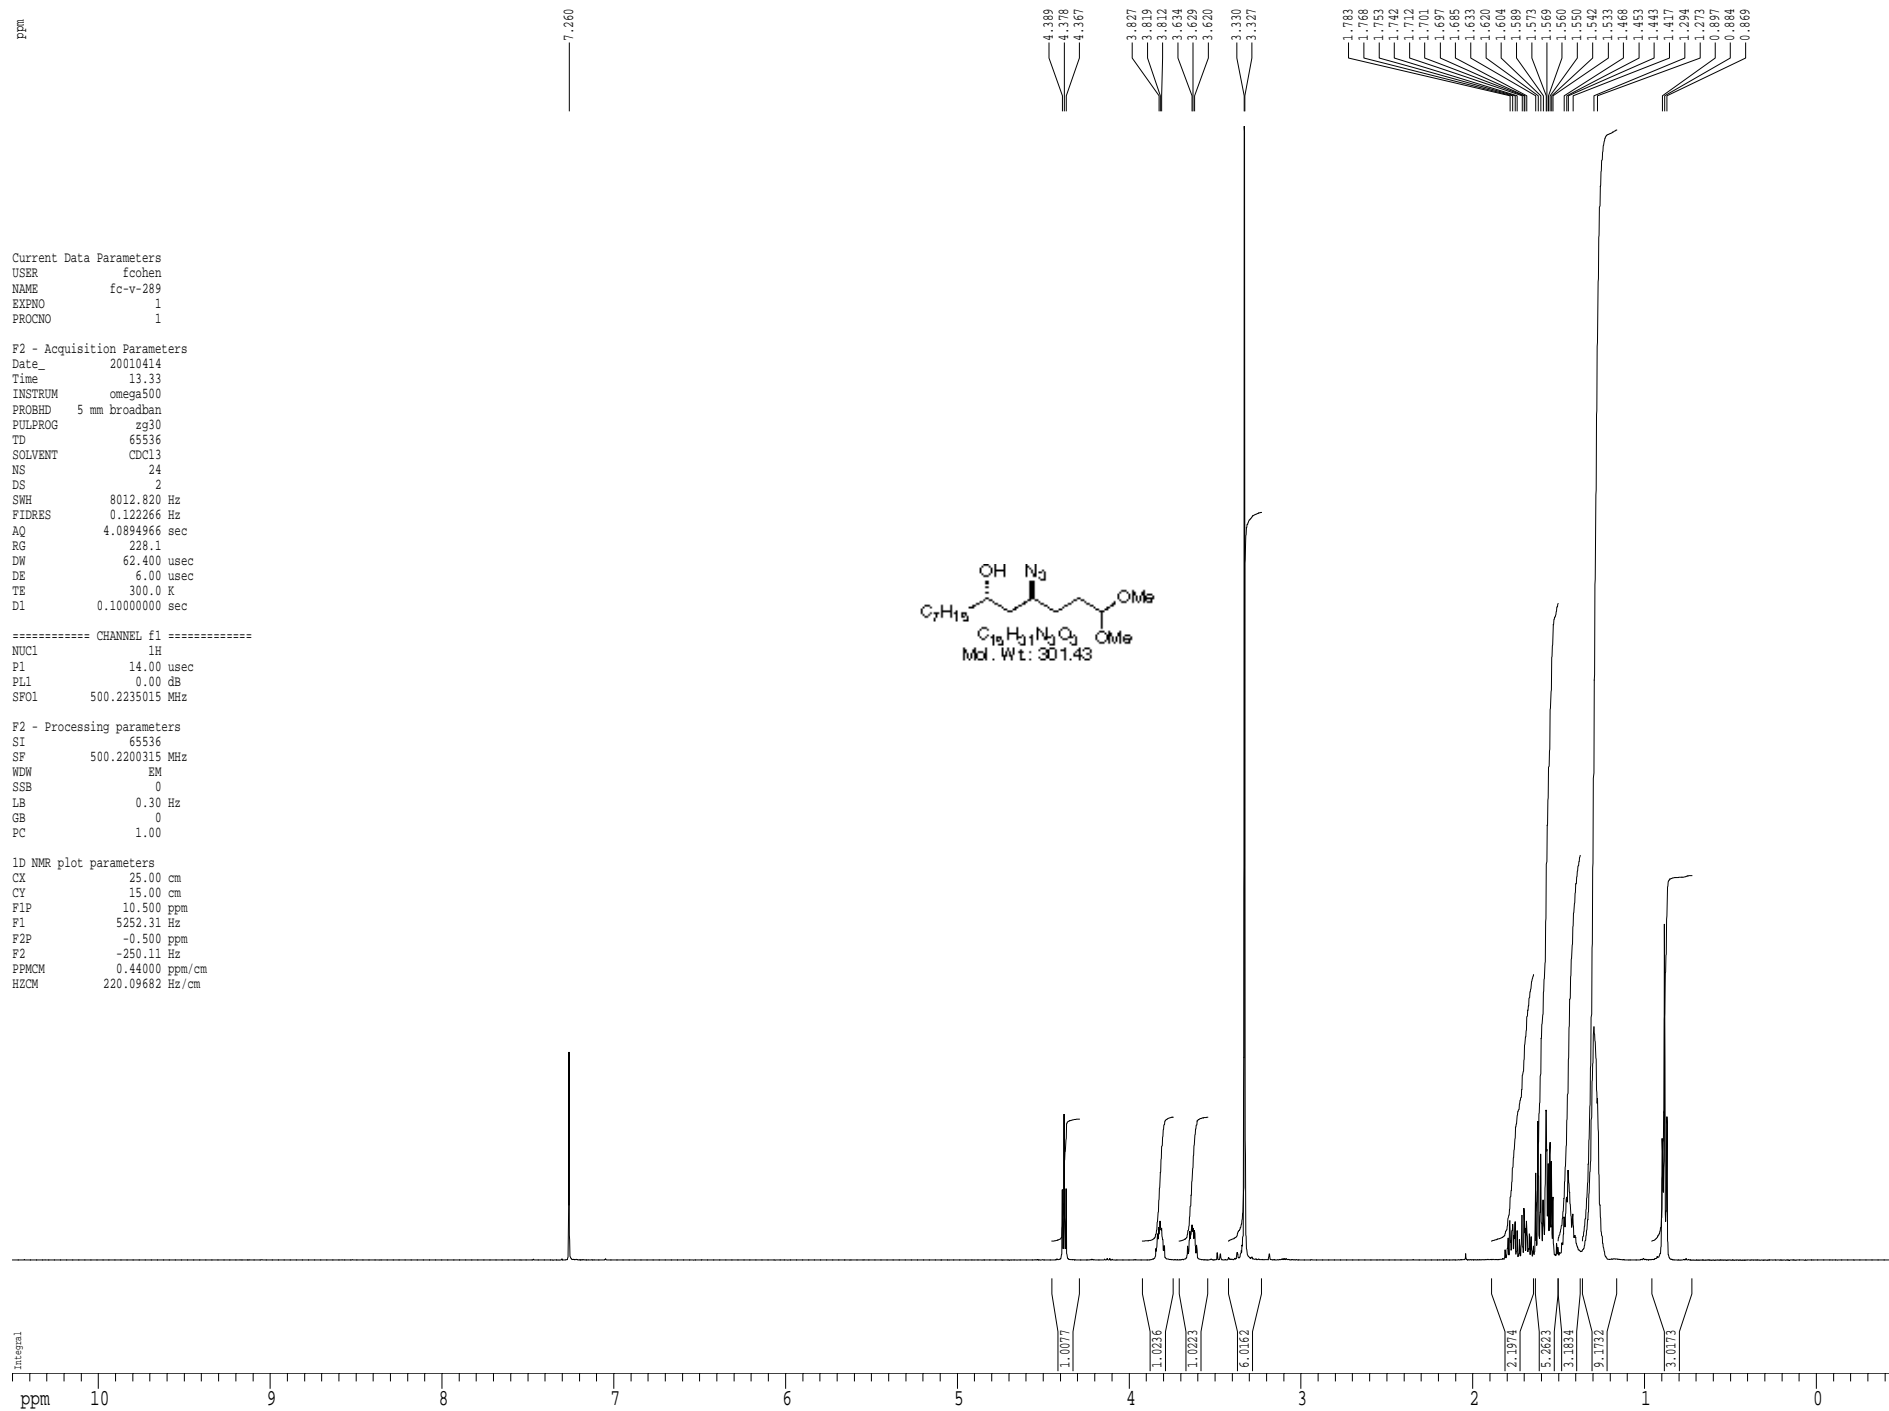

<sup>13</sup>C spectrum with <sup>1</sup>H decoupling

ppm

Current Data Parameters  
USER fcoben  
NAME fc-v-290  
EXPNO 2  
PROCNO 1

F2 - Acquisition Parameters  
Date\_ 20010415  
Time 18.08  
INSTRUM gn500  
PROBHD 5 mm broadband  
PULPROG zgdc30  
TD 65536  
SOLVENT MeOH  
NS 1160  
DS 2  
SWH 30303.031 Hz  
FIDRES 0.462388 Hz  
AQ 1.0813940 sec  
RG 5160.6  
DW 16.500 usec  
DE 4.50 usec  
TE 300.0 K  
D1 0.25000000 sec  
D11 0.03000000 sec

==== CHANNEL f1 =====  
NUC1 13C  
P1 6.25 usec  
PL1 0.00 dB  
SFO1 125.7464486 MHz

==== CHANNEL f2 =====  
CPDPRG2 waltz16  
NUC2 1H  
PCPD2 80.00 usec  
PL2 -3.00 dB  
PL12 13.50 dB  
SFO2 500.0335002 MHz

F2 - Processing parameters  
SI 65536  
SF 125.7326487 MHz  
WDW EM  
SSB 0  
LB 1.00 Hz  
GB 0  
PC 2.00

1D NMR plot parameters  
CX 25.00 cm  
CY 15.65 cm  
F1P 200.000 ppm  
F1 25146.53 Hz  
F2P 0.000 ppm  
F2 0.00 Hz  
PPMCM 8.00000 ppm/cm  
HZCM 1005.86121 Hz/cm

104.53  
77.25  
77.00  
76.75  
69.34  
52.98  
52.92  
49.02  
40.96  
37.76  
32.47  
31.83  
29.72  
29.47  
29.30  
25.88  
22.65  
14.07

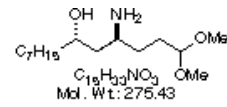

## 1H spectrum

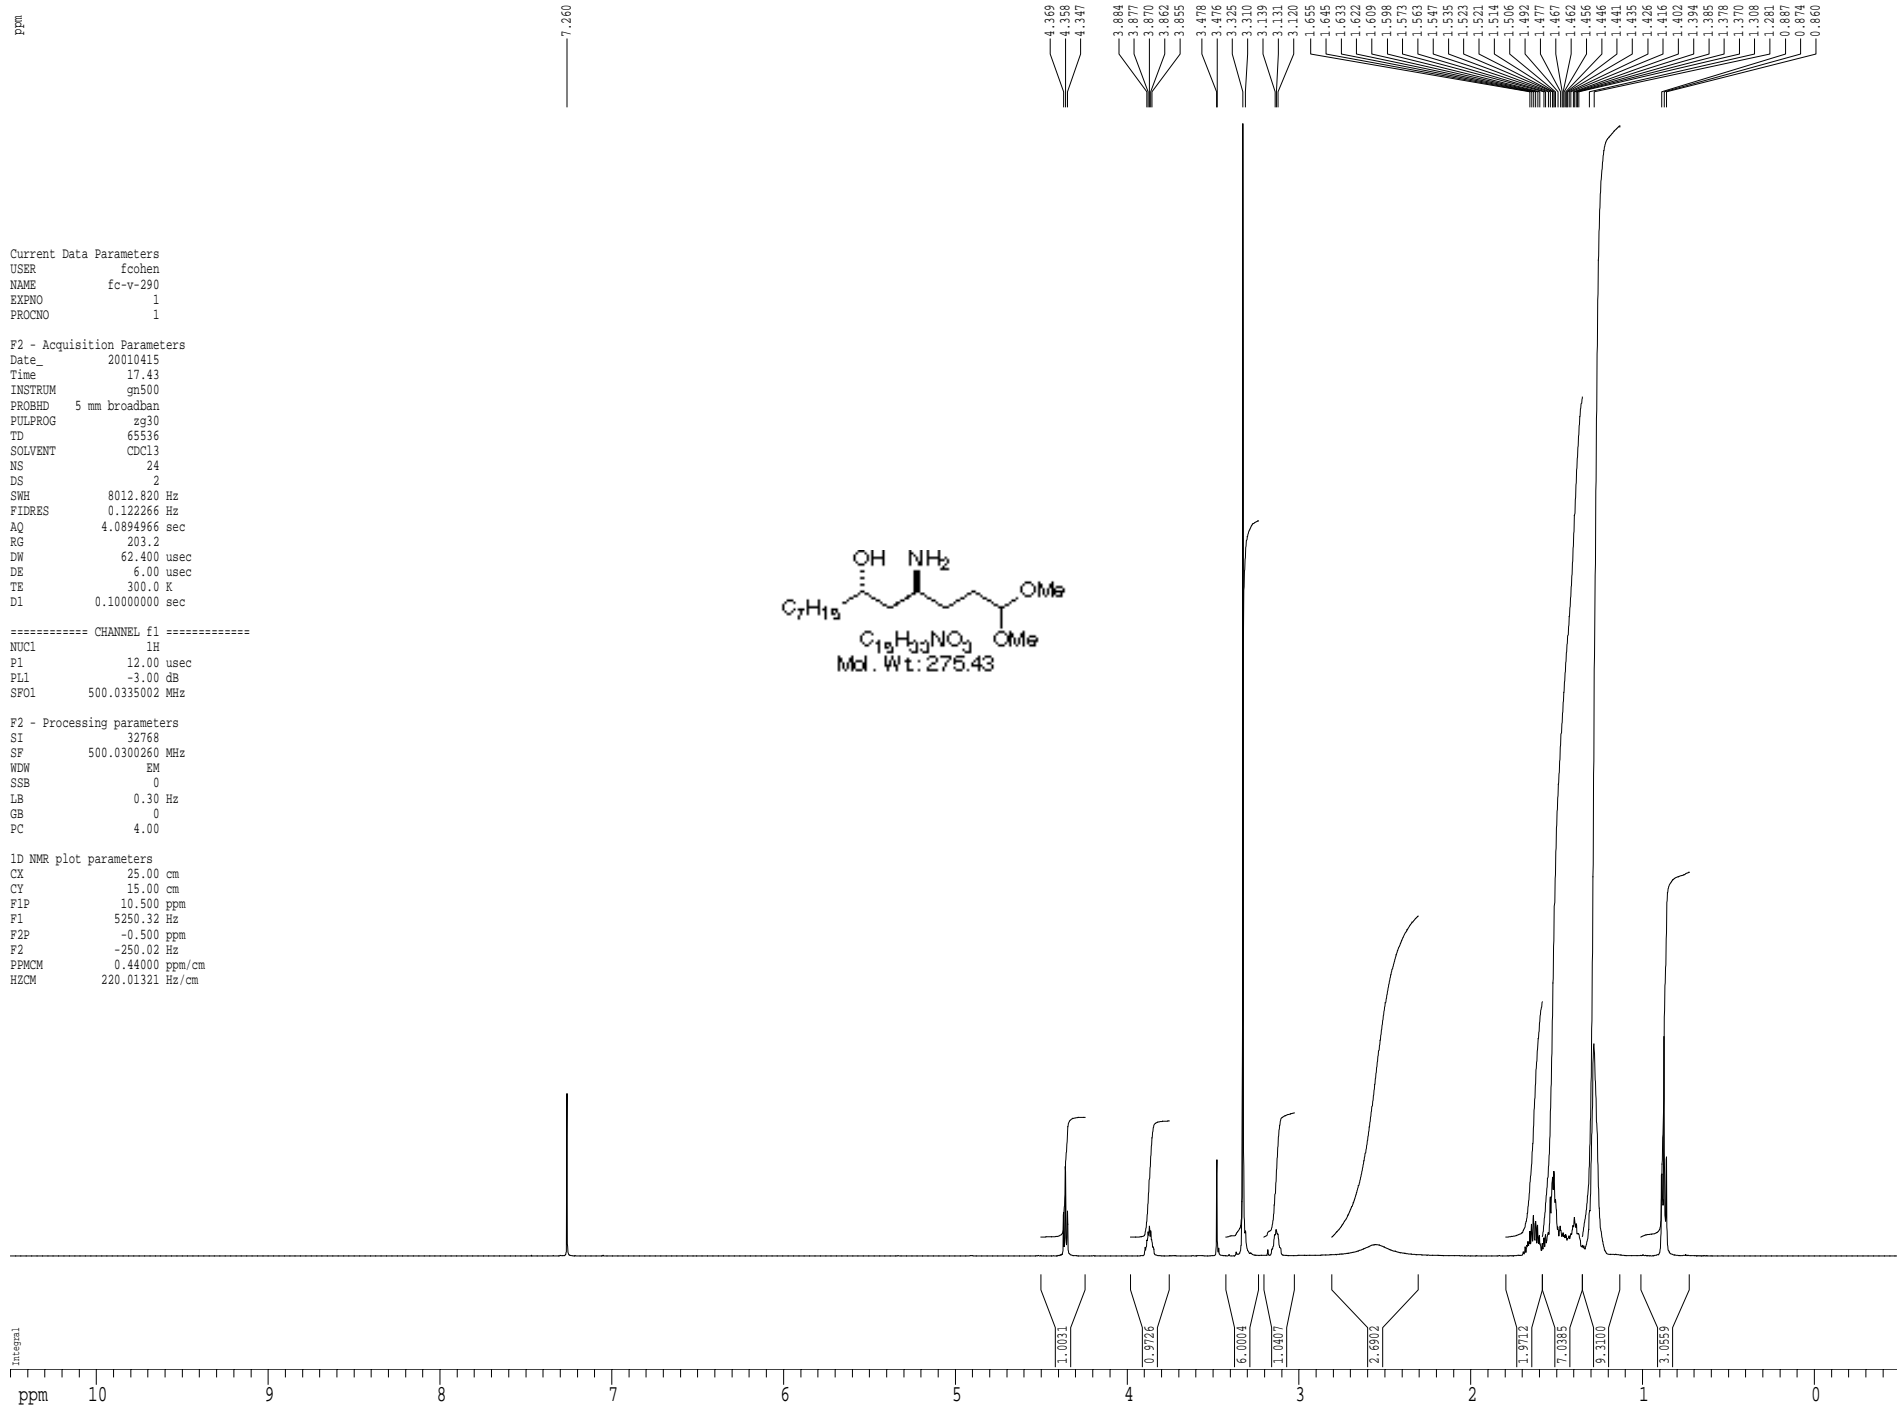

<sup>13</sup>C spectrum with <sup>1</sup>H decoupling

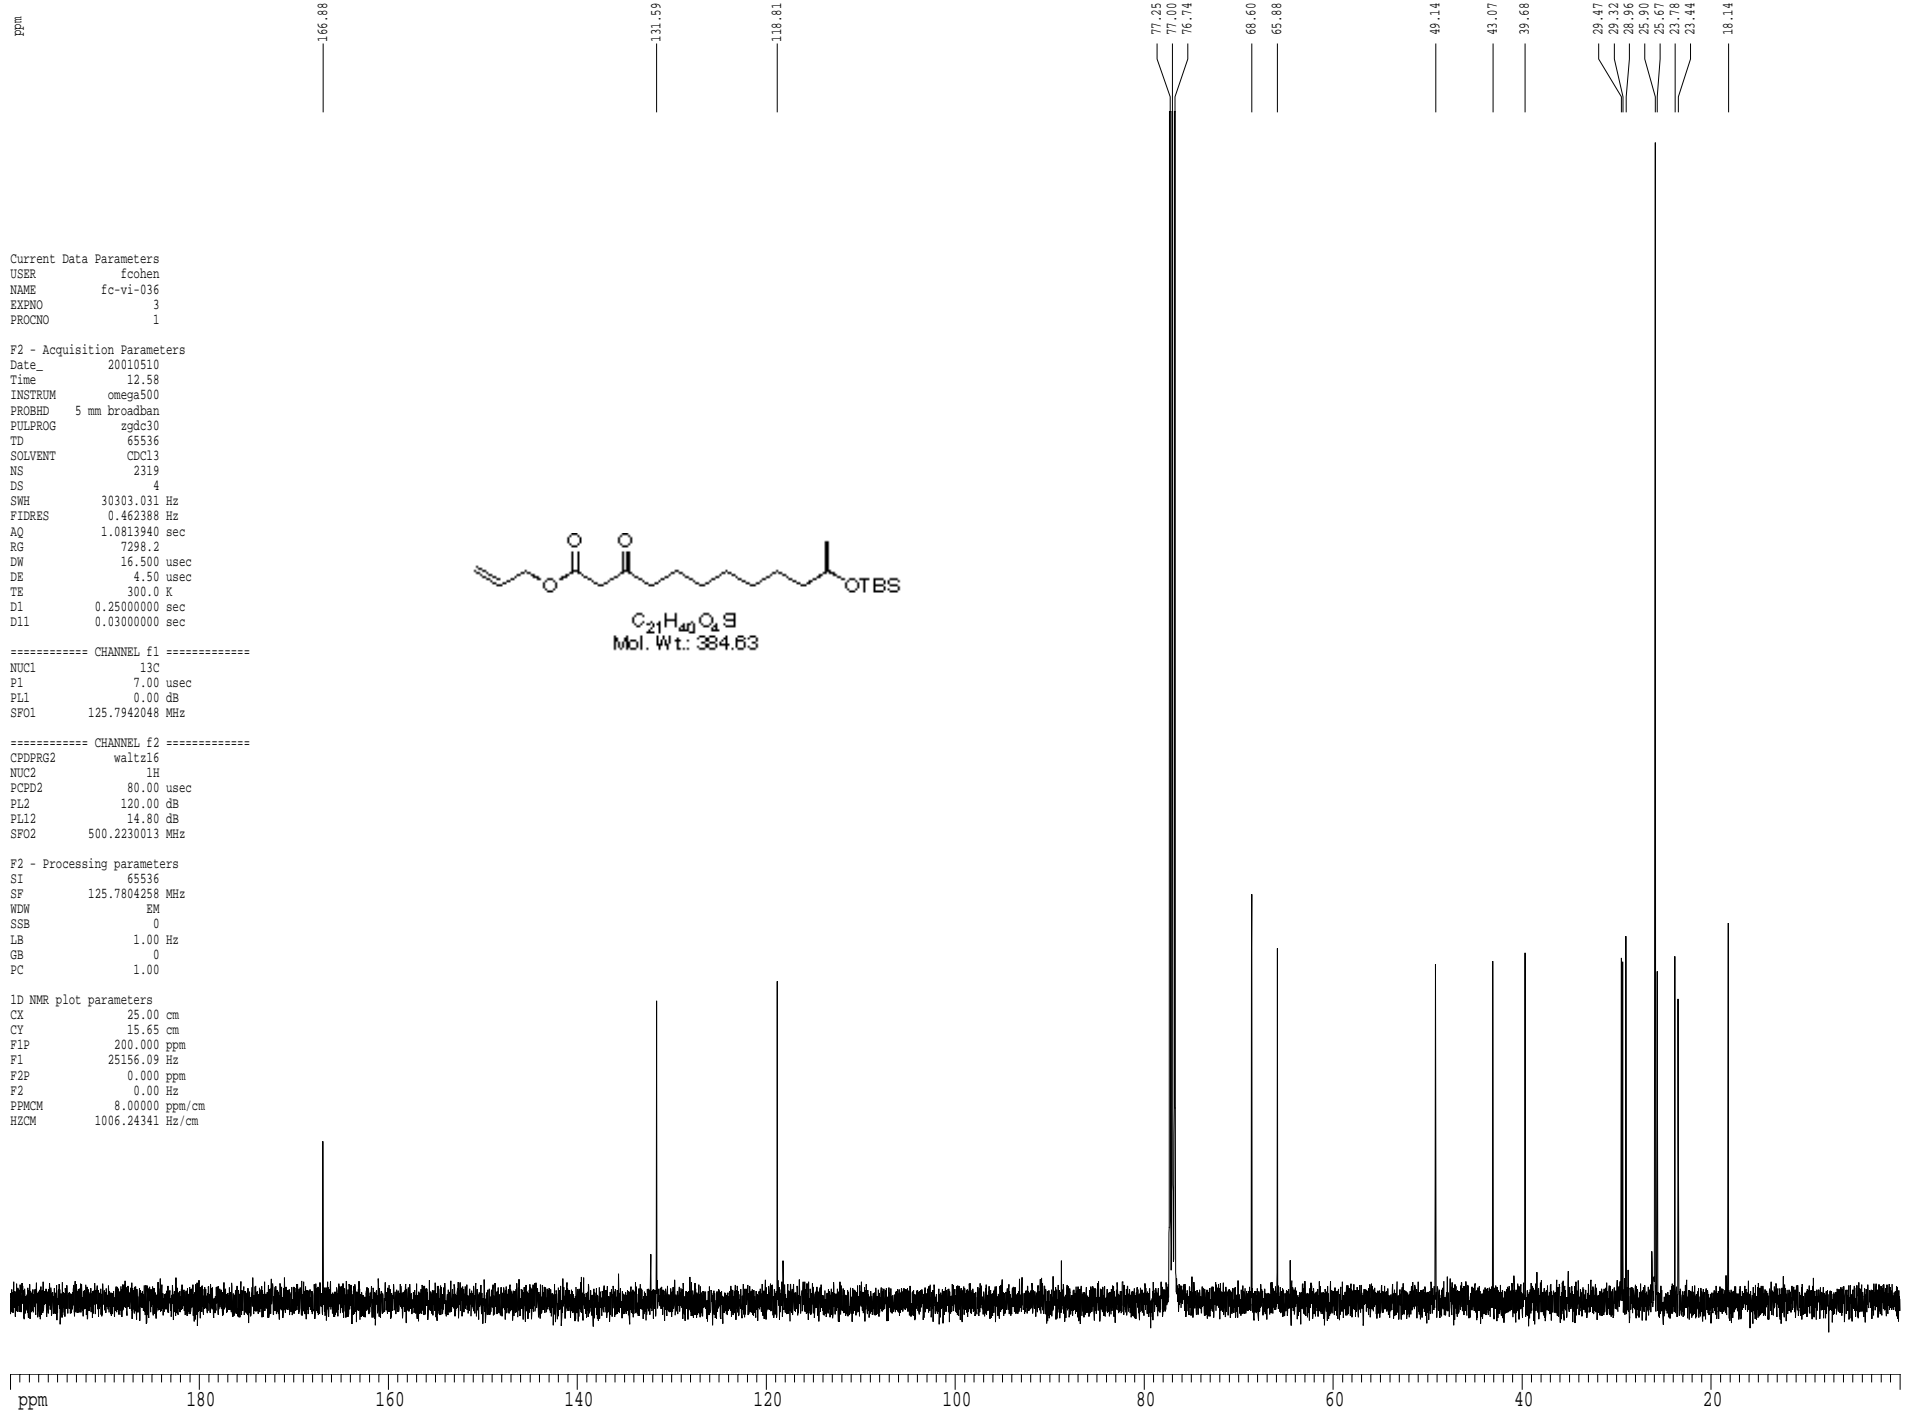

## 1H spectrum

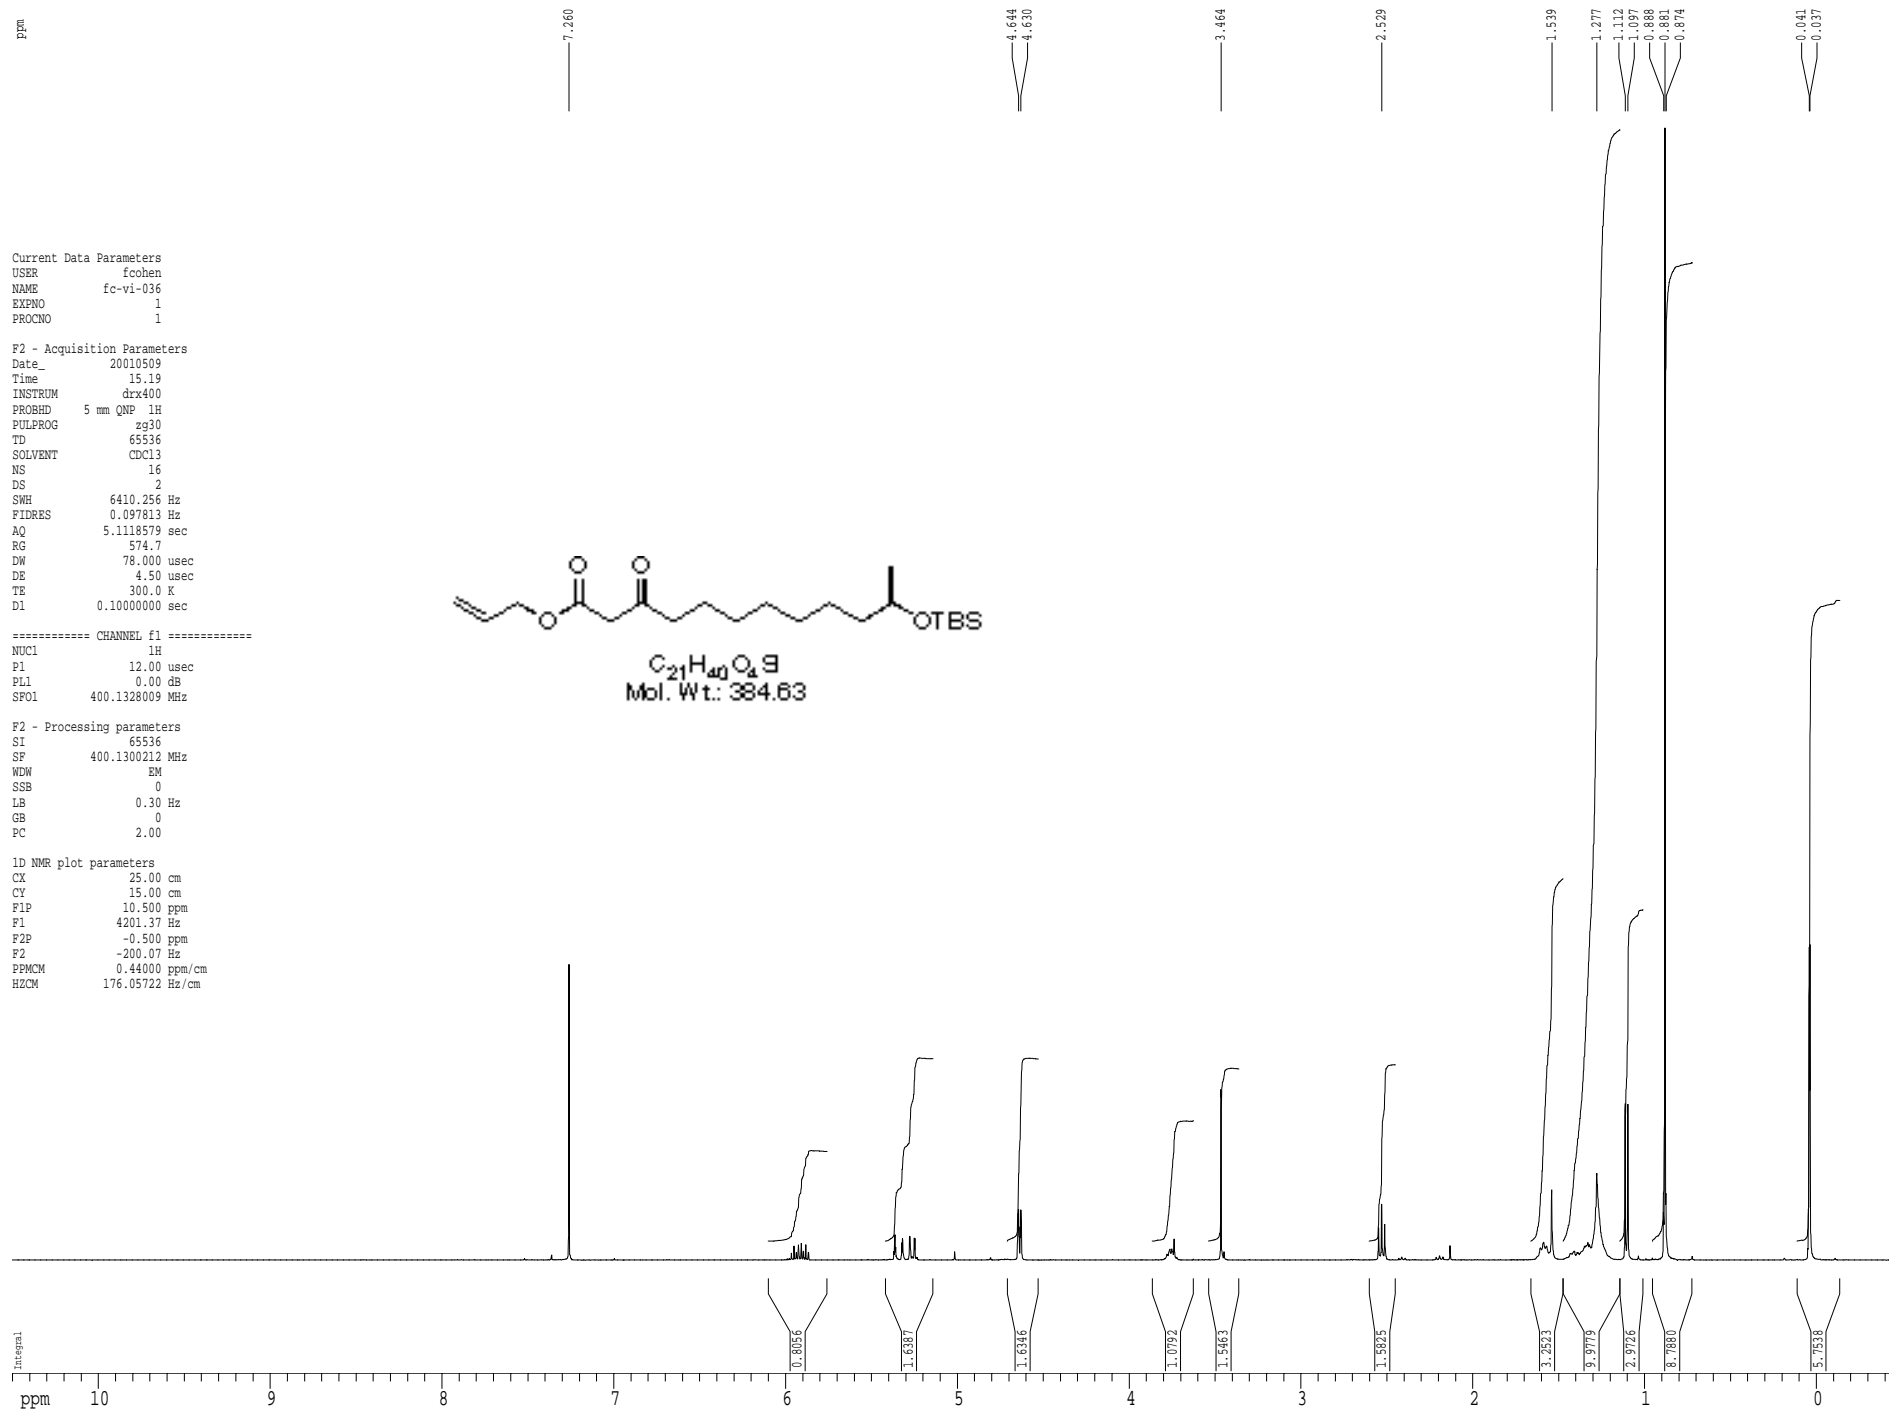

<sup>13</sup>C spectrum with <sup>1</sup>H decoupling

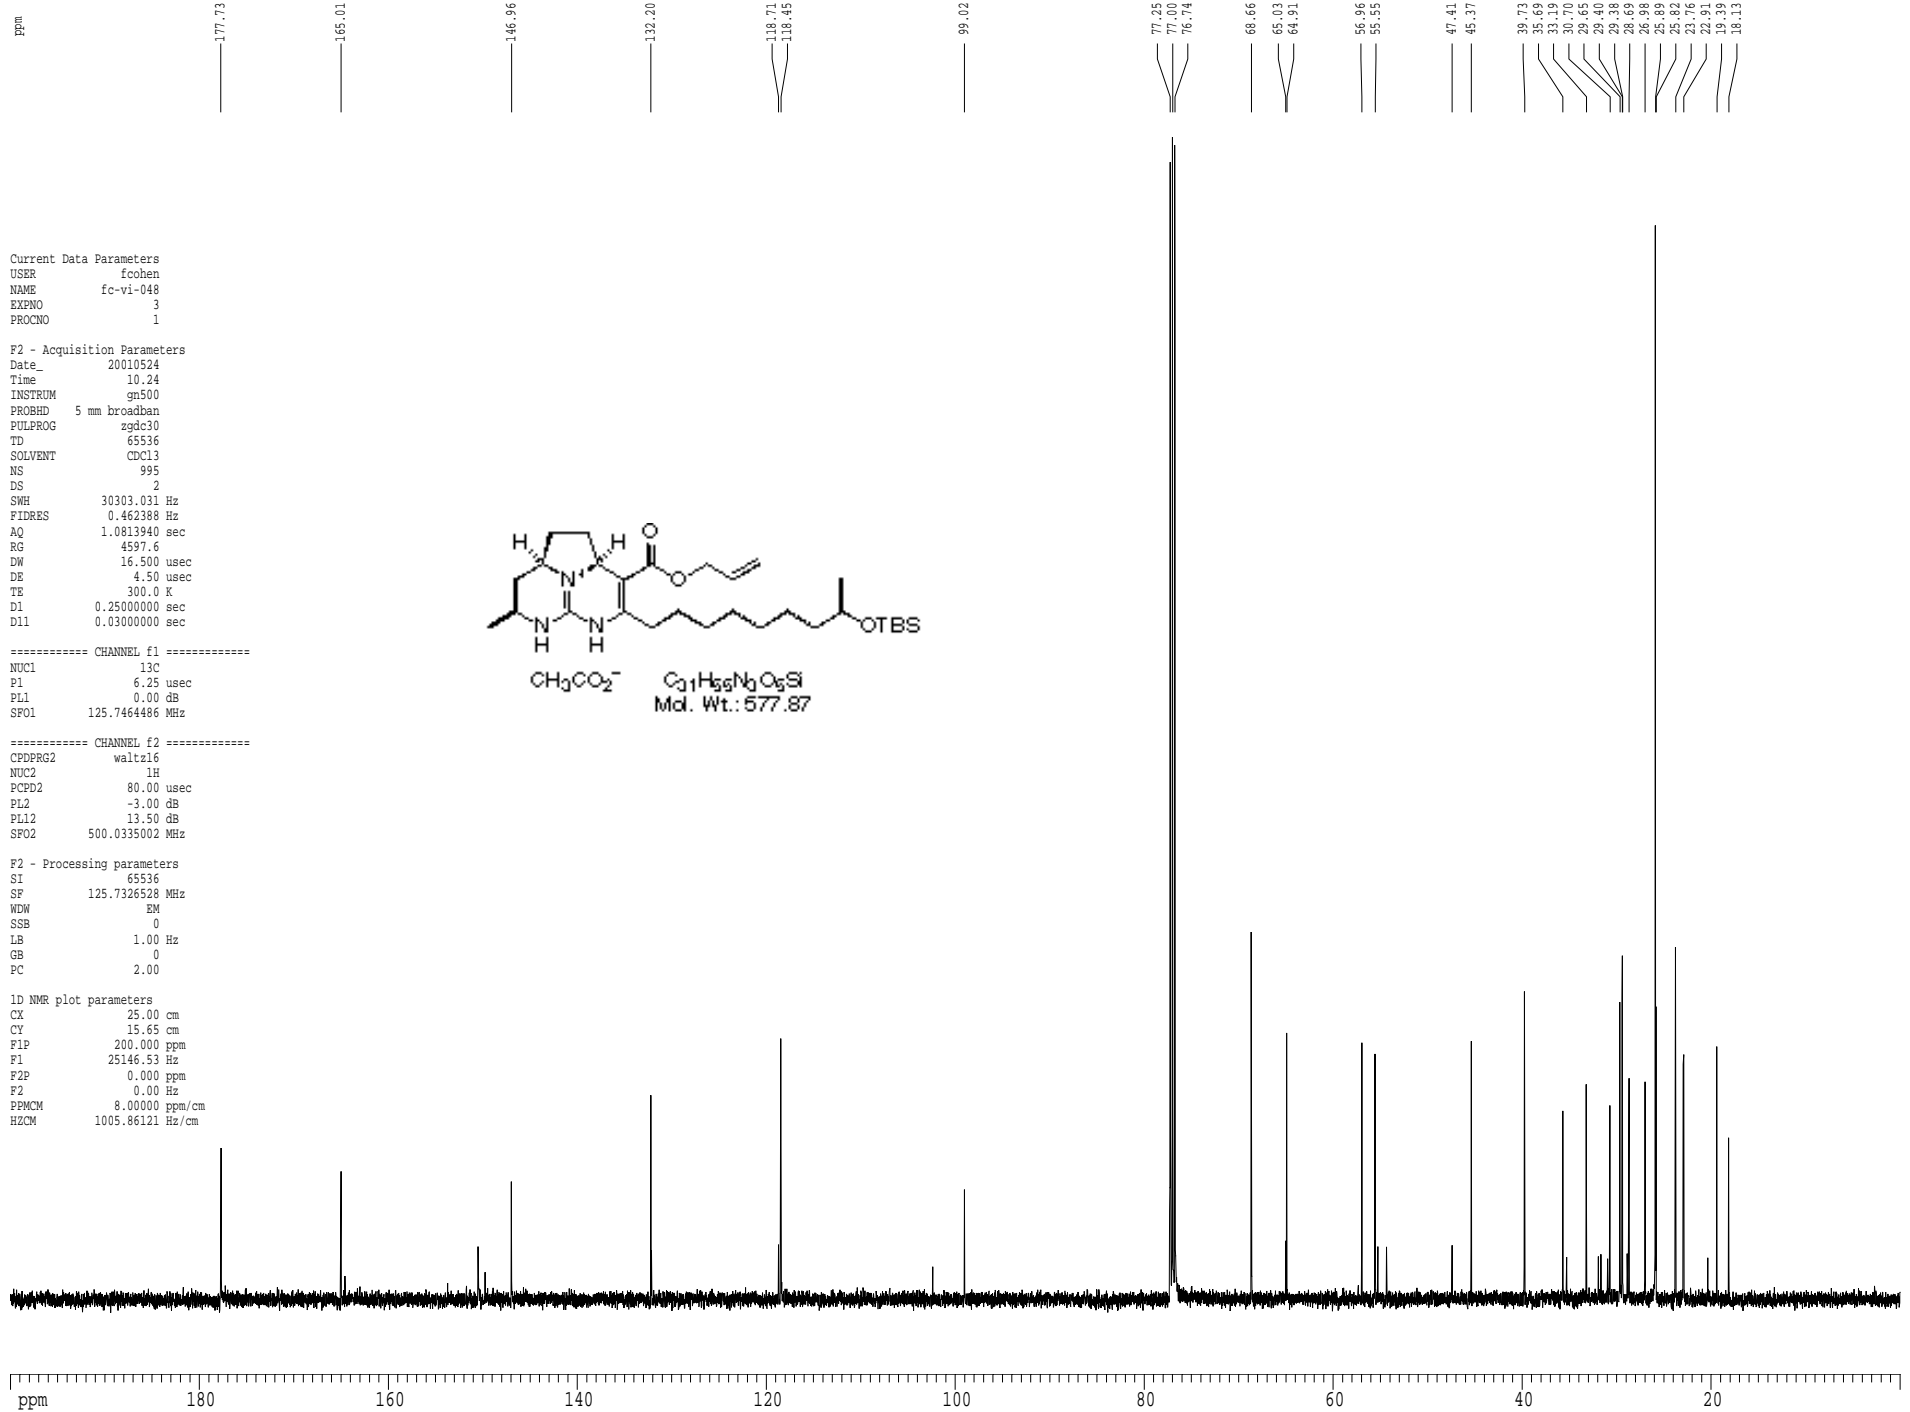

$^1\text{H}$  spectrum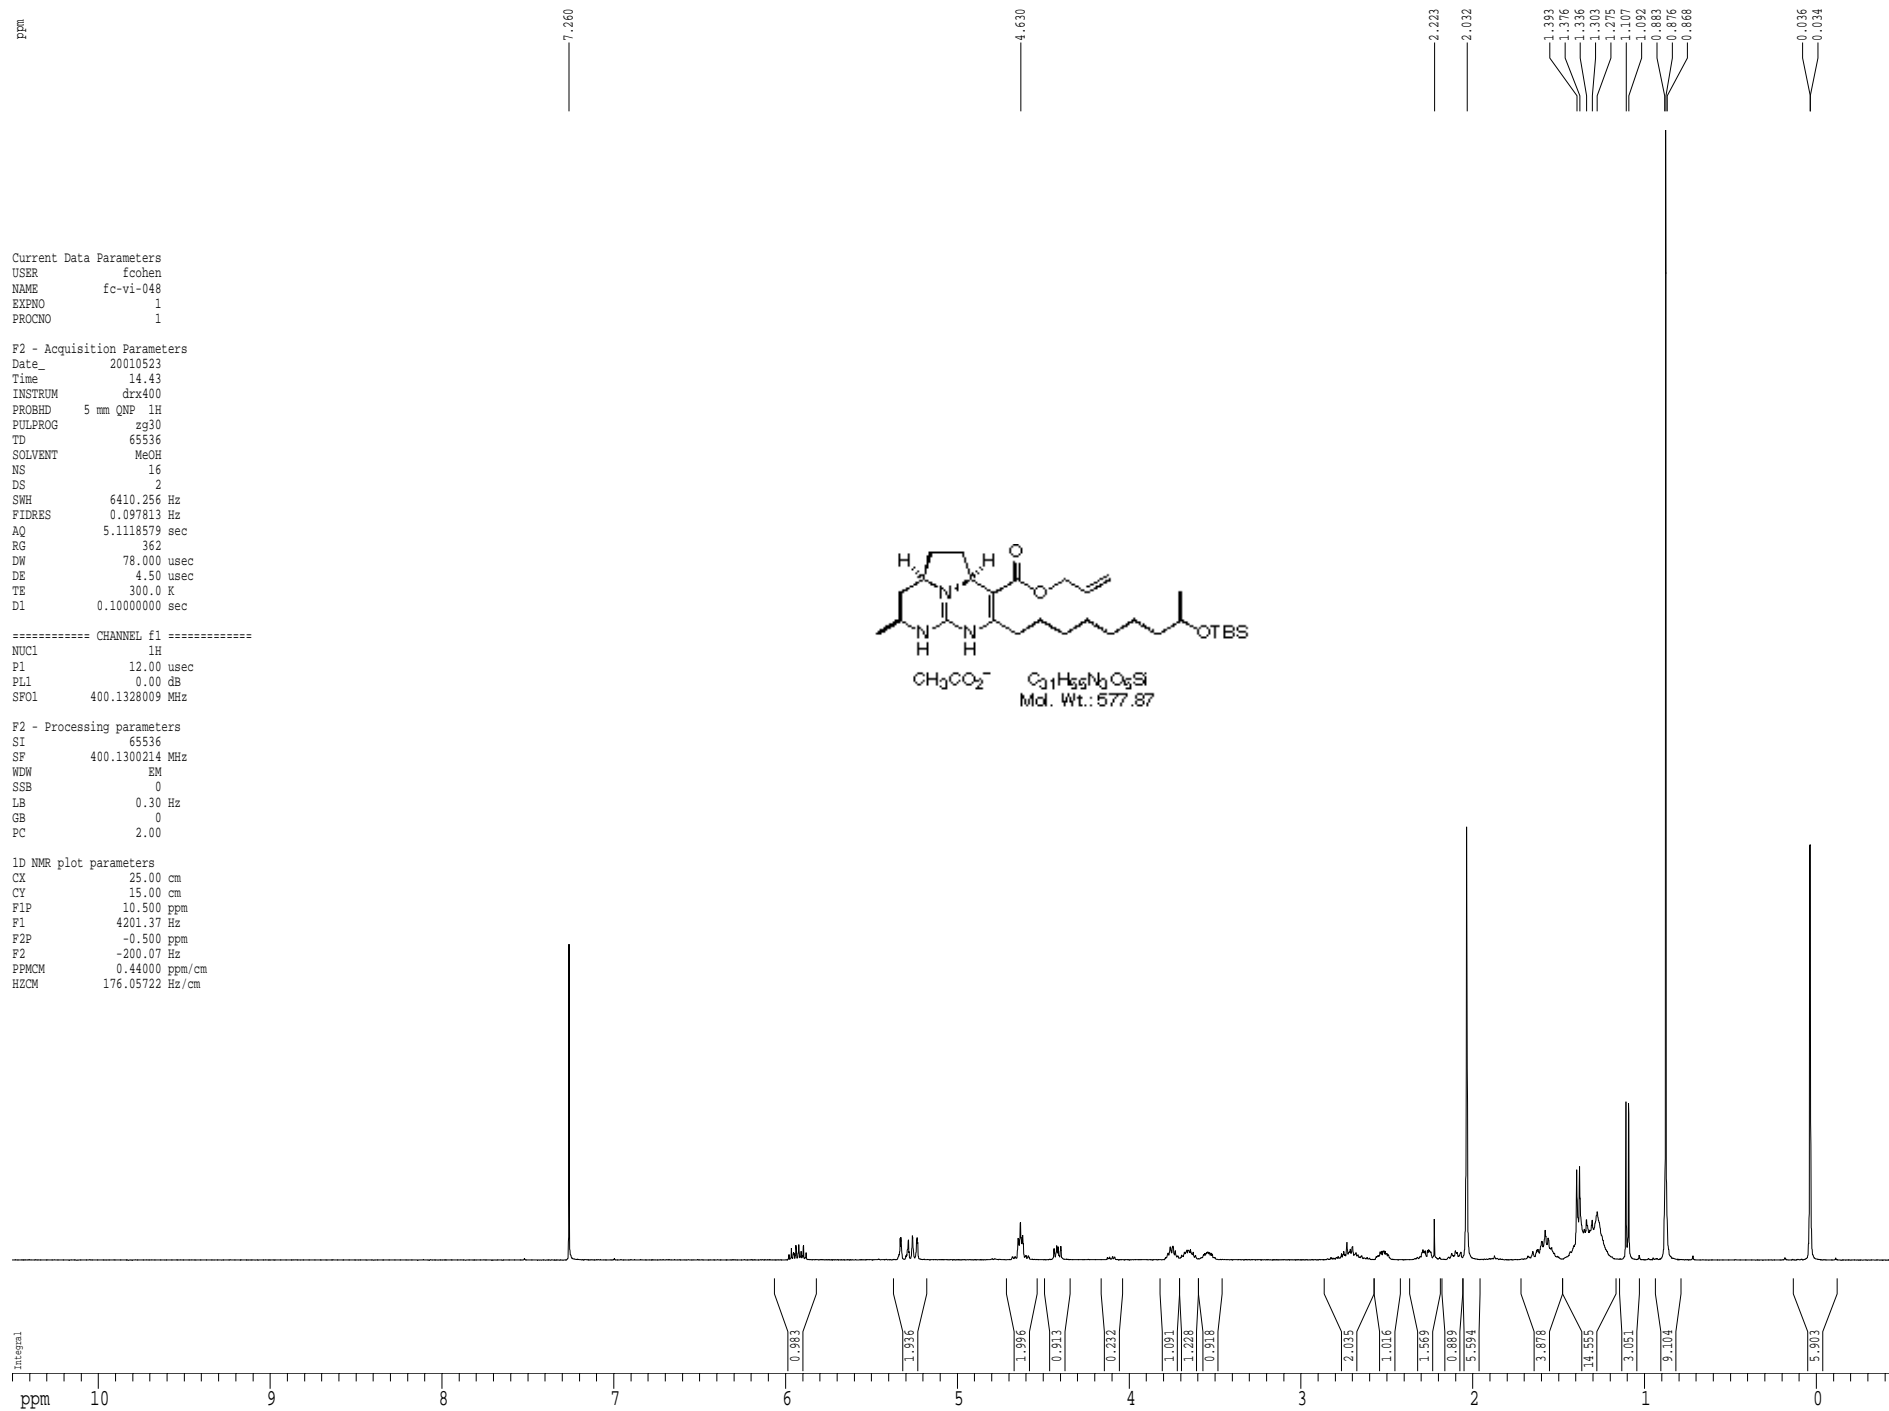

<sup>13</sup>C spectrum with 1H decoupling

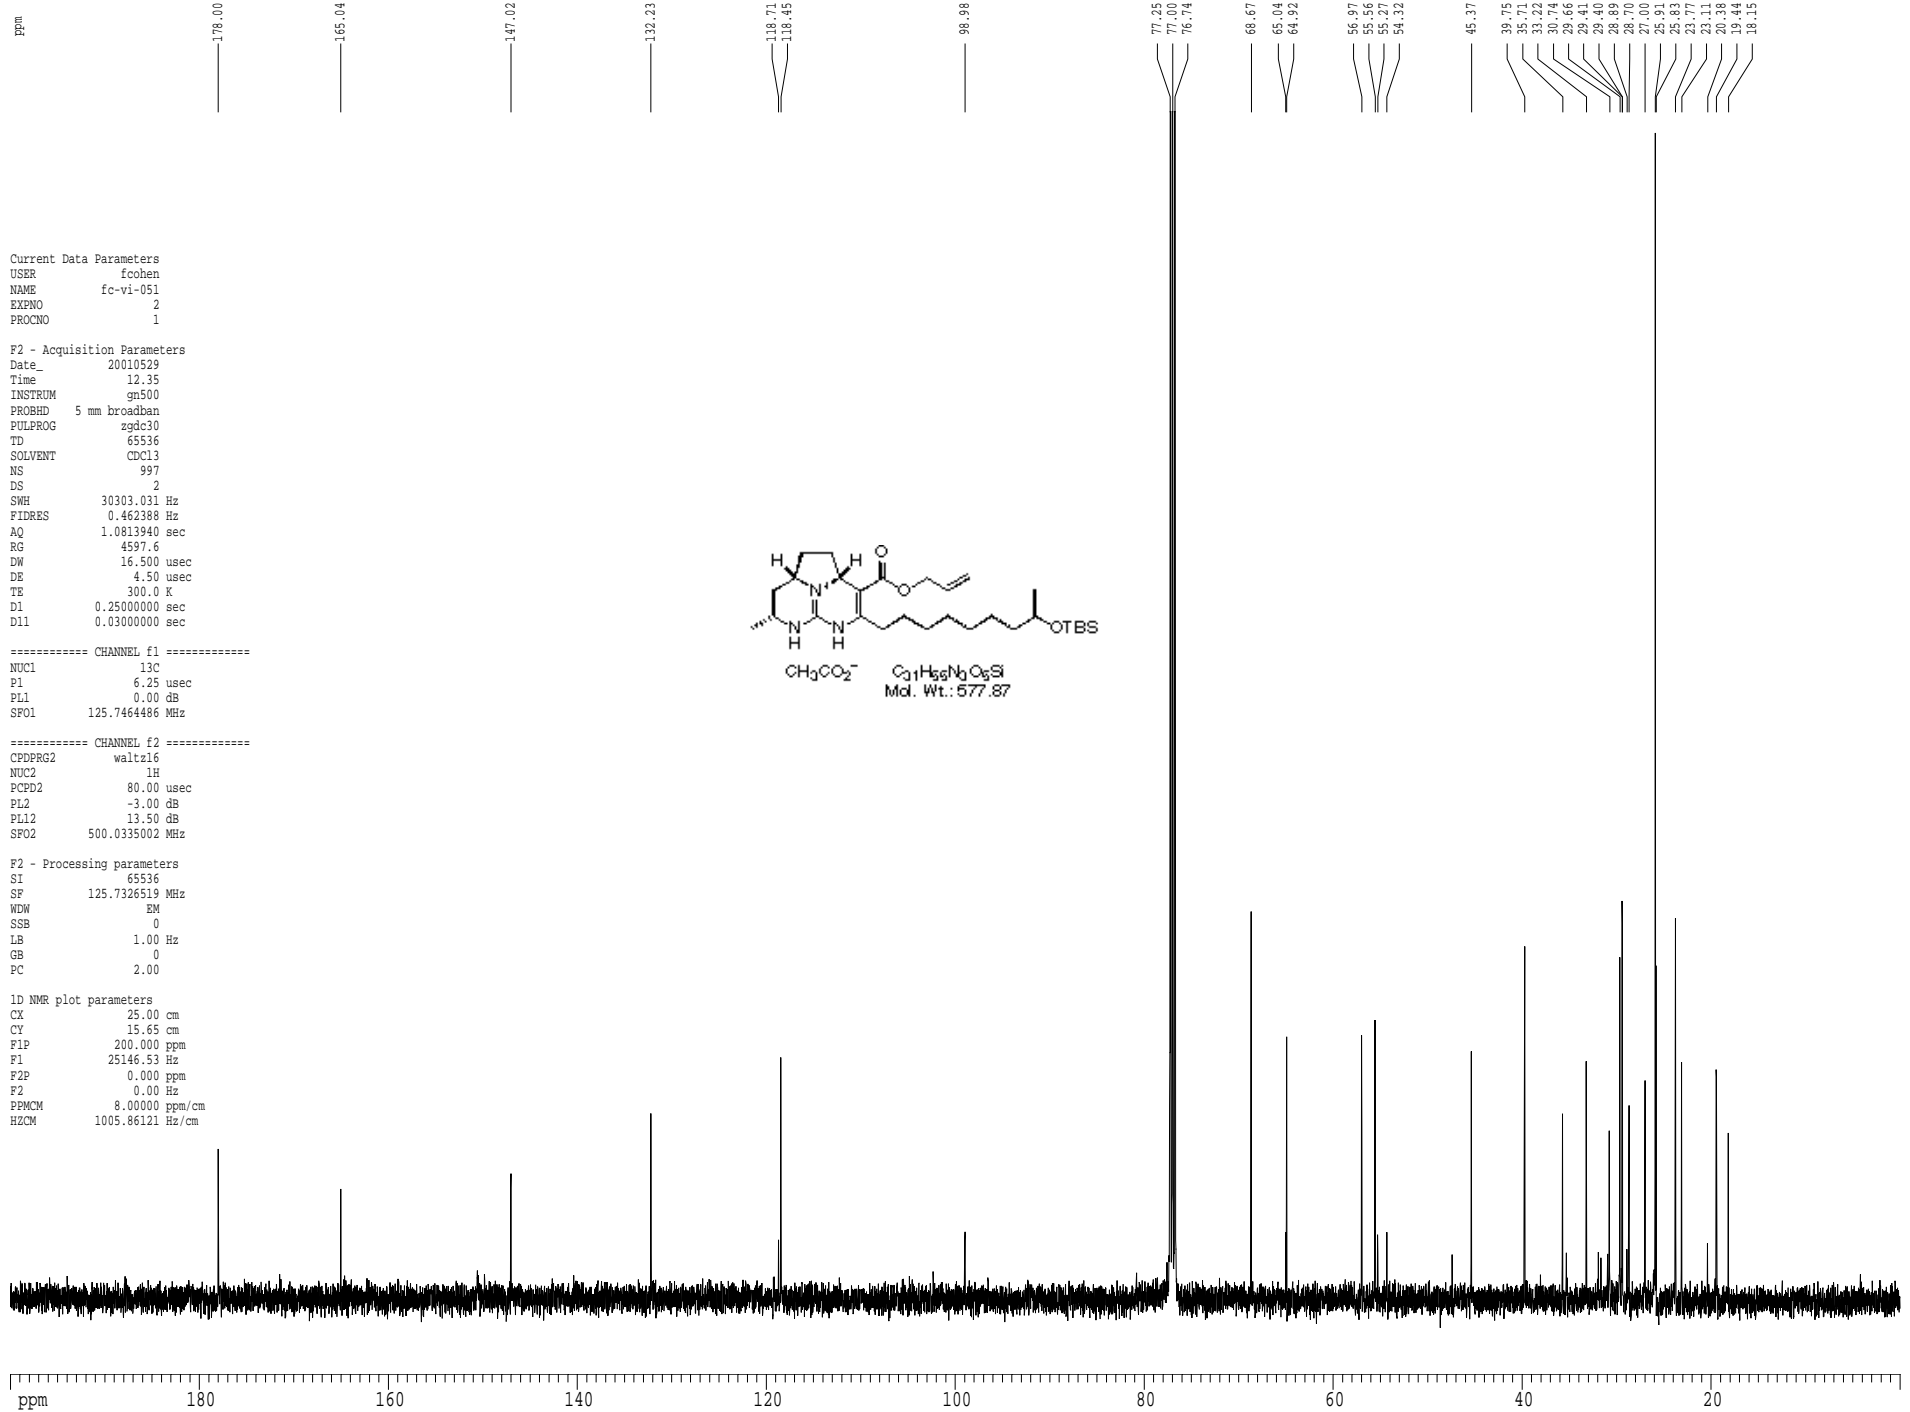

Current Data Parameters  
 USER fcohen  
 NAME fc-vi-051  
 EXPNO 2  
 PROCNO 1

F2 - Acquisition Parameters  
 Date\_ 20010529  
 Time 12.35  
 INSTRUM gn500  
 PROBHD 5 mm broadband  
 PULPROG zgdc30  
 TD 65536  
 SOLVENT CDCl3  
 NS 997  
 DS 2  
 SWH 30303.031 Hz  
 FIDRES 0.462388 Hz  
 AQ 1.0813940 sec  
 RG 4597.6  
 DW 16.500 usec  
 DE 4.50 usec  
 TE 300.0 K  
 D1 0.25000000 sec  
 D11 0.03000000 sec

===== CHANNEL f1 =====  
 NUC1 13C  
 P1 6.25 usec  
 PL1 0.00 dB  
 SFO1 125.7464486 MHz

===== CHANNEL f2 =====  
 CPDPRG2 waltz16  
 NUC2 1H  
 PCPD2 80.00 usec  
 PL2 -3.00 dB  
 PL12 13.50 dB  
 SFO2 500.0335002 MHz

F2 - Processing parameters  
 SI 65536  
 SF 125.7326519 MHz  
 WDM EM  
 SSB 0  
 LB 1.00 Hz  
 GB 0  
 PC 2.00

1D NMR plot parameters  
 CX 25.00 cm  
 CY 15.65 cm  
 FID 200.000 ppm  
 F1 25146.53 Hz  
 F2P 0.000 ppm  
 F2 0.00 Hz  
 PPMCM 8.00000 ppm/cm  
 HZCM 1005.86121 Hz/cm



<sup>1</sup>H spectrum

ppm

Current Data Parameters  
 USER fcohen  
 NAME fc-vi-051  
 EXPNO 1  
 PROCNO 1

F2 - Acquisition Parameters  
 Date\_ 20010529  
 Time 12.11  
 INSTRUM gn500  
 PROBHD 5 mm broadband  
 PULPROG zg30  
 TD 65536  
 SOLVENT CDCl3  
 NS 8  
 DS 2  
 SWH 8012.820 Hz  
 FIDRES 0.122266 Hz  
 AQ 4.0894966 sec  
 RG 203.2  
 DW 62.400 usec  
 DE 6.00 usec  
 TE 300.0 K  
 D1 0.10000000 sec

===== CHANNEL f1 =====  
 NUC1 <sup>1</sup>H  
 P1 12.00 usec  
 PL1 -3.00 dB  
 SFO1 500.0335002 MHz

F2 - Processing parameters  
 SI 32768  
 SF 500.0300260 MHz  
 WDW EM  
 SSB 0  
 LB 0.30 Hz  
 GB 0  
 PC 4.00

1D NMR plot parameters  
 CX 25.00 cm  
 CY 15.00 cm  
 F1P 10.500 ppm  
 F1 5250.32 Hz  
 F2P -0.500 ppm  
 F2 -250.02 Hz  
 PPMCM 0.44000 ppm/cm  
 HZCM 220.01321 Hz/cm

7.260

5.321  
5.318  
5.286  
5.284  
5.251  
5.249  
5.231  
4.638  
4.636  
4.629  
4.626  
4.624  
4.617  
4.615  
4.425  
4.414  
4.406  
4.394  
3.753  
3.741  
2.736  
2.686  
2.218  
2.009  
1.587  
1.571  
1.571  
1.566  
1.407  
1.387  
1.382  
1.374  
1.370  
1.349  
1.326  
1.300  
1.285  
1.277  
1.271  
1.258  
1.244  
1.101  
1.089  
1.077  
0.871  
0.866  
0.032  
0.030

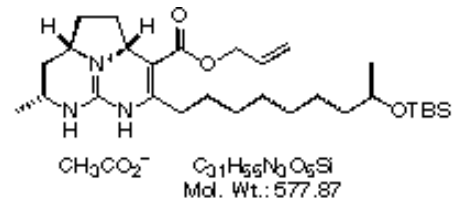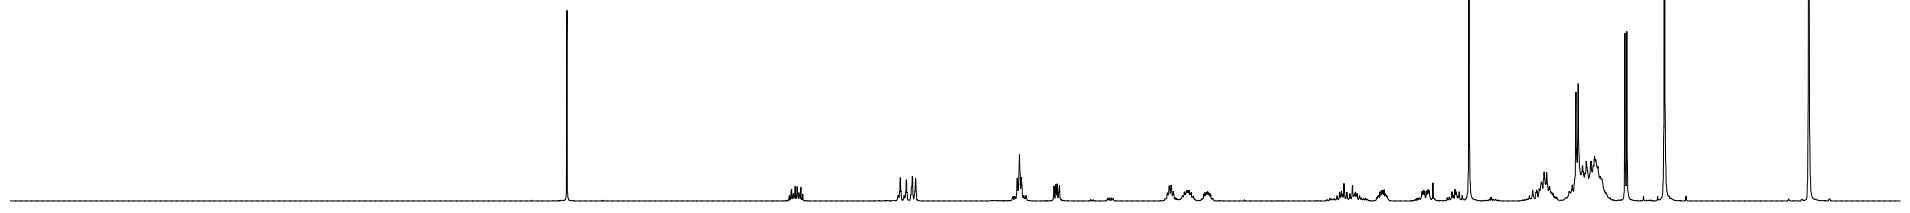

Integral

ppm

10 9 8 7 6 5 4 3 2 1 0

0.902  
1.830  
1.912  
0.831  
1.042  
1.200  
0.823  
1.921  
0.965  
1.298  
0.992  
4.213  
3.838  
14.531  
3.001  
9.056  
5.914

<sup>13</sup>C spectrum with 1H decoupling

ppm

151.06

```

Current Data Parameters
USER          fcohen
NAME          fc-vi-052
EXPNO         3
PROCNO        1

F2 - Acquisition Parameters
Date_         20010601
Time          12.25
INSTRUM       gn500
PROBHD        5 mm broadband
PULPROG       zgdc30
TD            65536
SOLVENT       CDCl3
NS            1137
DS            2
SWH           30303.031 Hz
FIDRES        0.462388 Hz
AQ            1.0813940 sec
RG            2298.8
DW            16.500 usec
DE            4.50 usec
TE            300.0 K
D1            0.25000000 sec
D11           0.03000000 sec

===== CHANNEL f1 =====
NUC1          13C
P1            6.25 usec
PL1           0.00 dB
SFO1         125.7464486 MHz

===== CHANNEL f2 =====
CPDPRG2       waltz16
NUC2          1H
PCPD2         80.00 usec
PL2           -3.00 dB
PL12          13.50 dB
SFO2         500.0335002 MHz

F2 - Processing parameters
SI            65536
SF           125.7324706 MHz
WDM           EM
SSB           0
LB            1.00 Hz
GB            0
PC            2.00

1D NMR plot parameters
CX            25.00 cm
CY            20.00 cm
FIP           200.000 ppm
F1            25146.49 Hz
F2P           0.000 ppm
F2            0.00 Hz
PPMCM         8.00000 ppm/cm
HZCM          1005.85974 Hz/cm
    
```

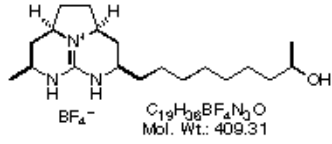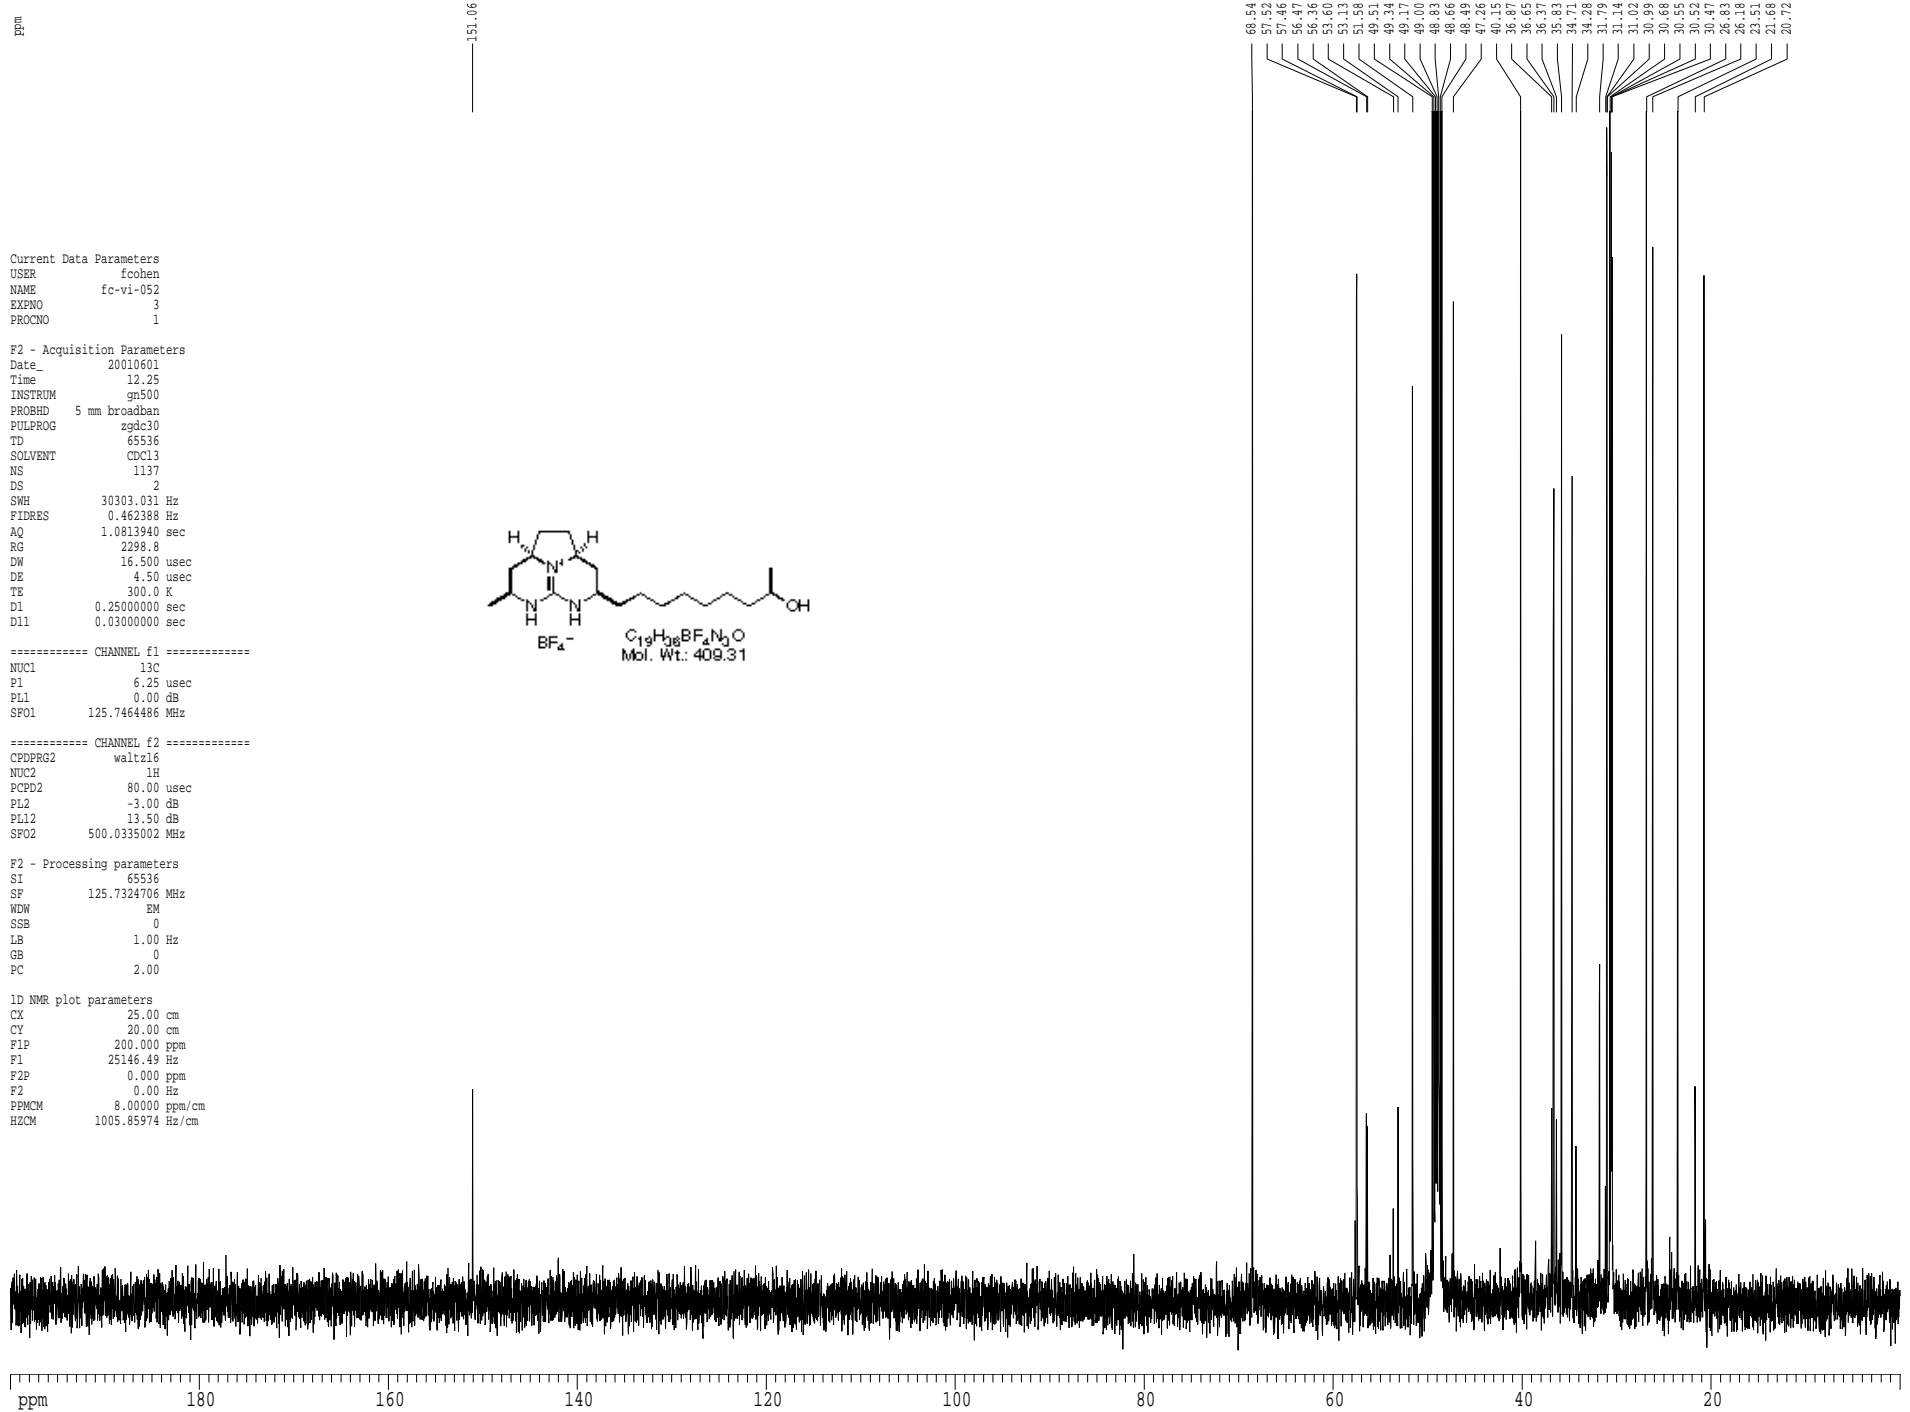

ppm

180

160

140

120

100

80

60

40

20

## 1H spectrum

ppm

Current Data Parameters  
 USER fcobhen  
 NAME fc-vi-052  
 EXPNO 2  
 PROCNO 1

F2 - Acquisition Parameters  
 Date\_ 20010601  
 Time 11.59  
 INSTRUM gn500  
 PROBHD 5 mm broadban  
 PULPROG zg30  
 TD 65536  
 SOLVENT MeOH  
 NS 16  
 DS 2  
 SWH 8012.820 Hz  
 FIDRES 0.122266 Hz  
 AQ 4.0894966 sec  
 RG 90.5  
 DW 62.400 usec  
 DE 6.00 usec  
 TE 300.0 K  
 D1 0.10000000 sec

===== CHANNEL f1 =====  
 NUC1 1H  
 P1 12.00 usec  
 PL1 -3.00 dB  
 SFO1 500.0335002 MHz

F2 - Processing parameters  
 SI 32768  
 SF 500.0300183 MHz  
 WDW EM  
 SSB 0  
 LB 0.30 Hz  
 GB 0  
 PC 4.00

1D NMR plot parameters  
 CX 25.00 cm  
 CY 15.00 cm  
 F1P 10.500 ppm  
 F1 5250.32 Hz  
 F2P -0.500 ppm  
 F2 -250.02 Hz  
 PPMCM 0.44000 ppm/cm  
 HZCM 220.01321 Hz/cm

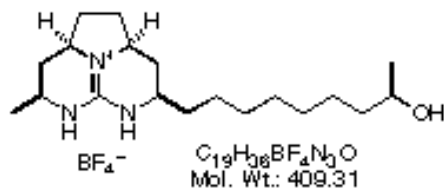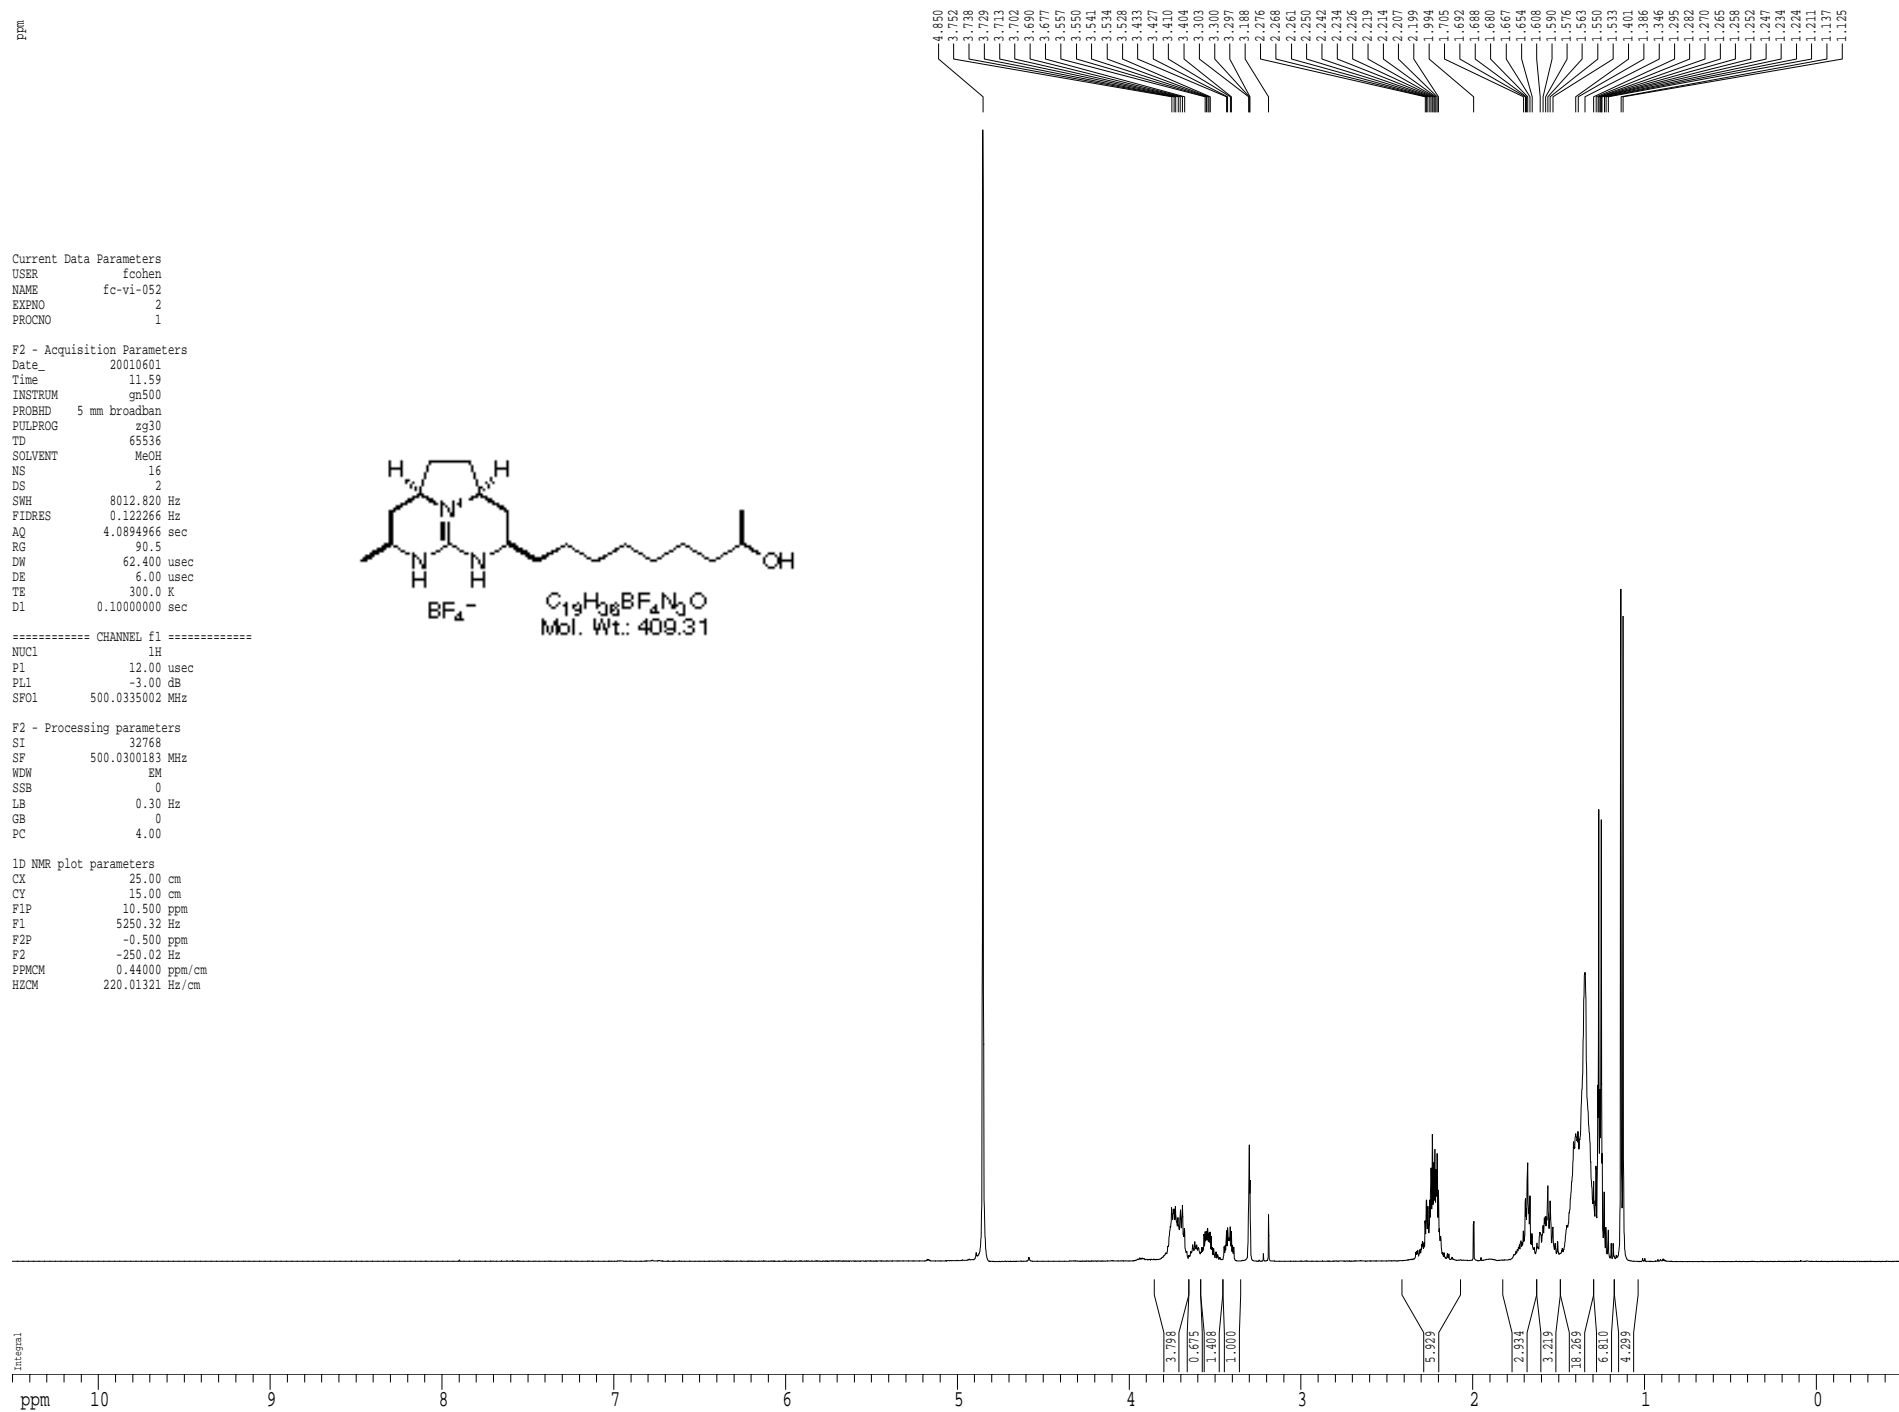

Integral

ppm

<sup>13</sup>C spectrum with <sup>1</sup>H decoupling

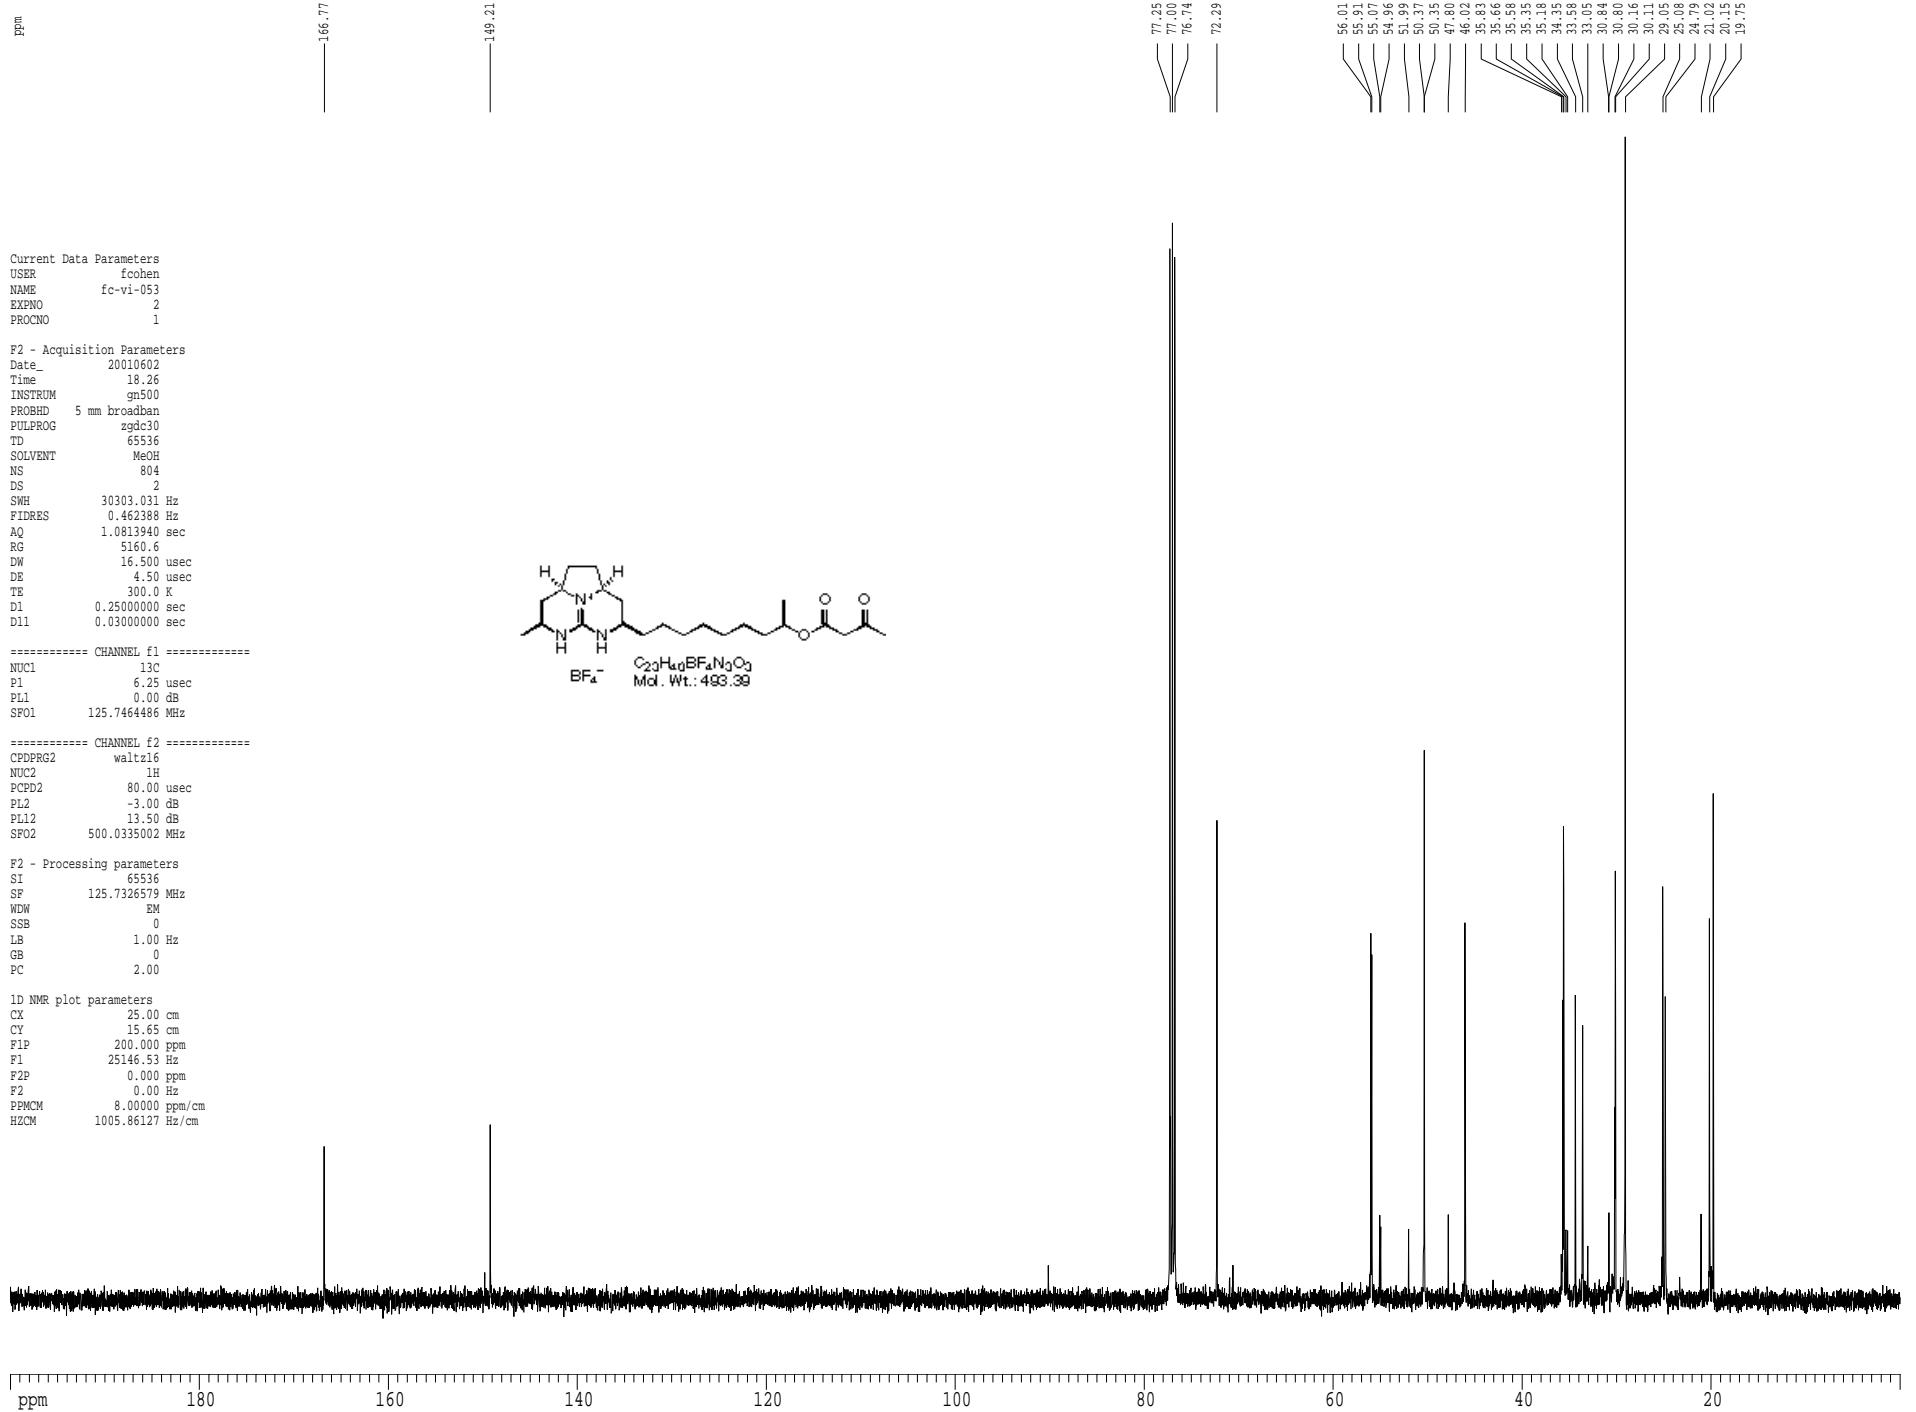

## 1H spectrum

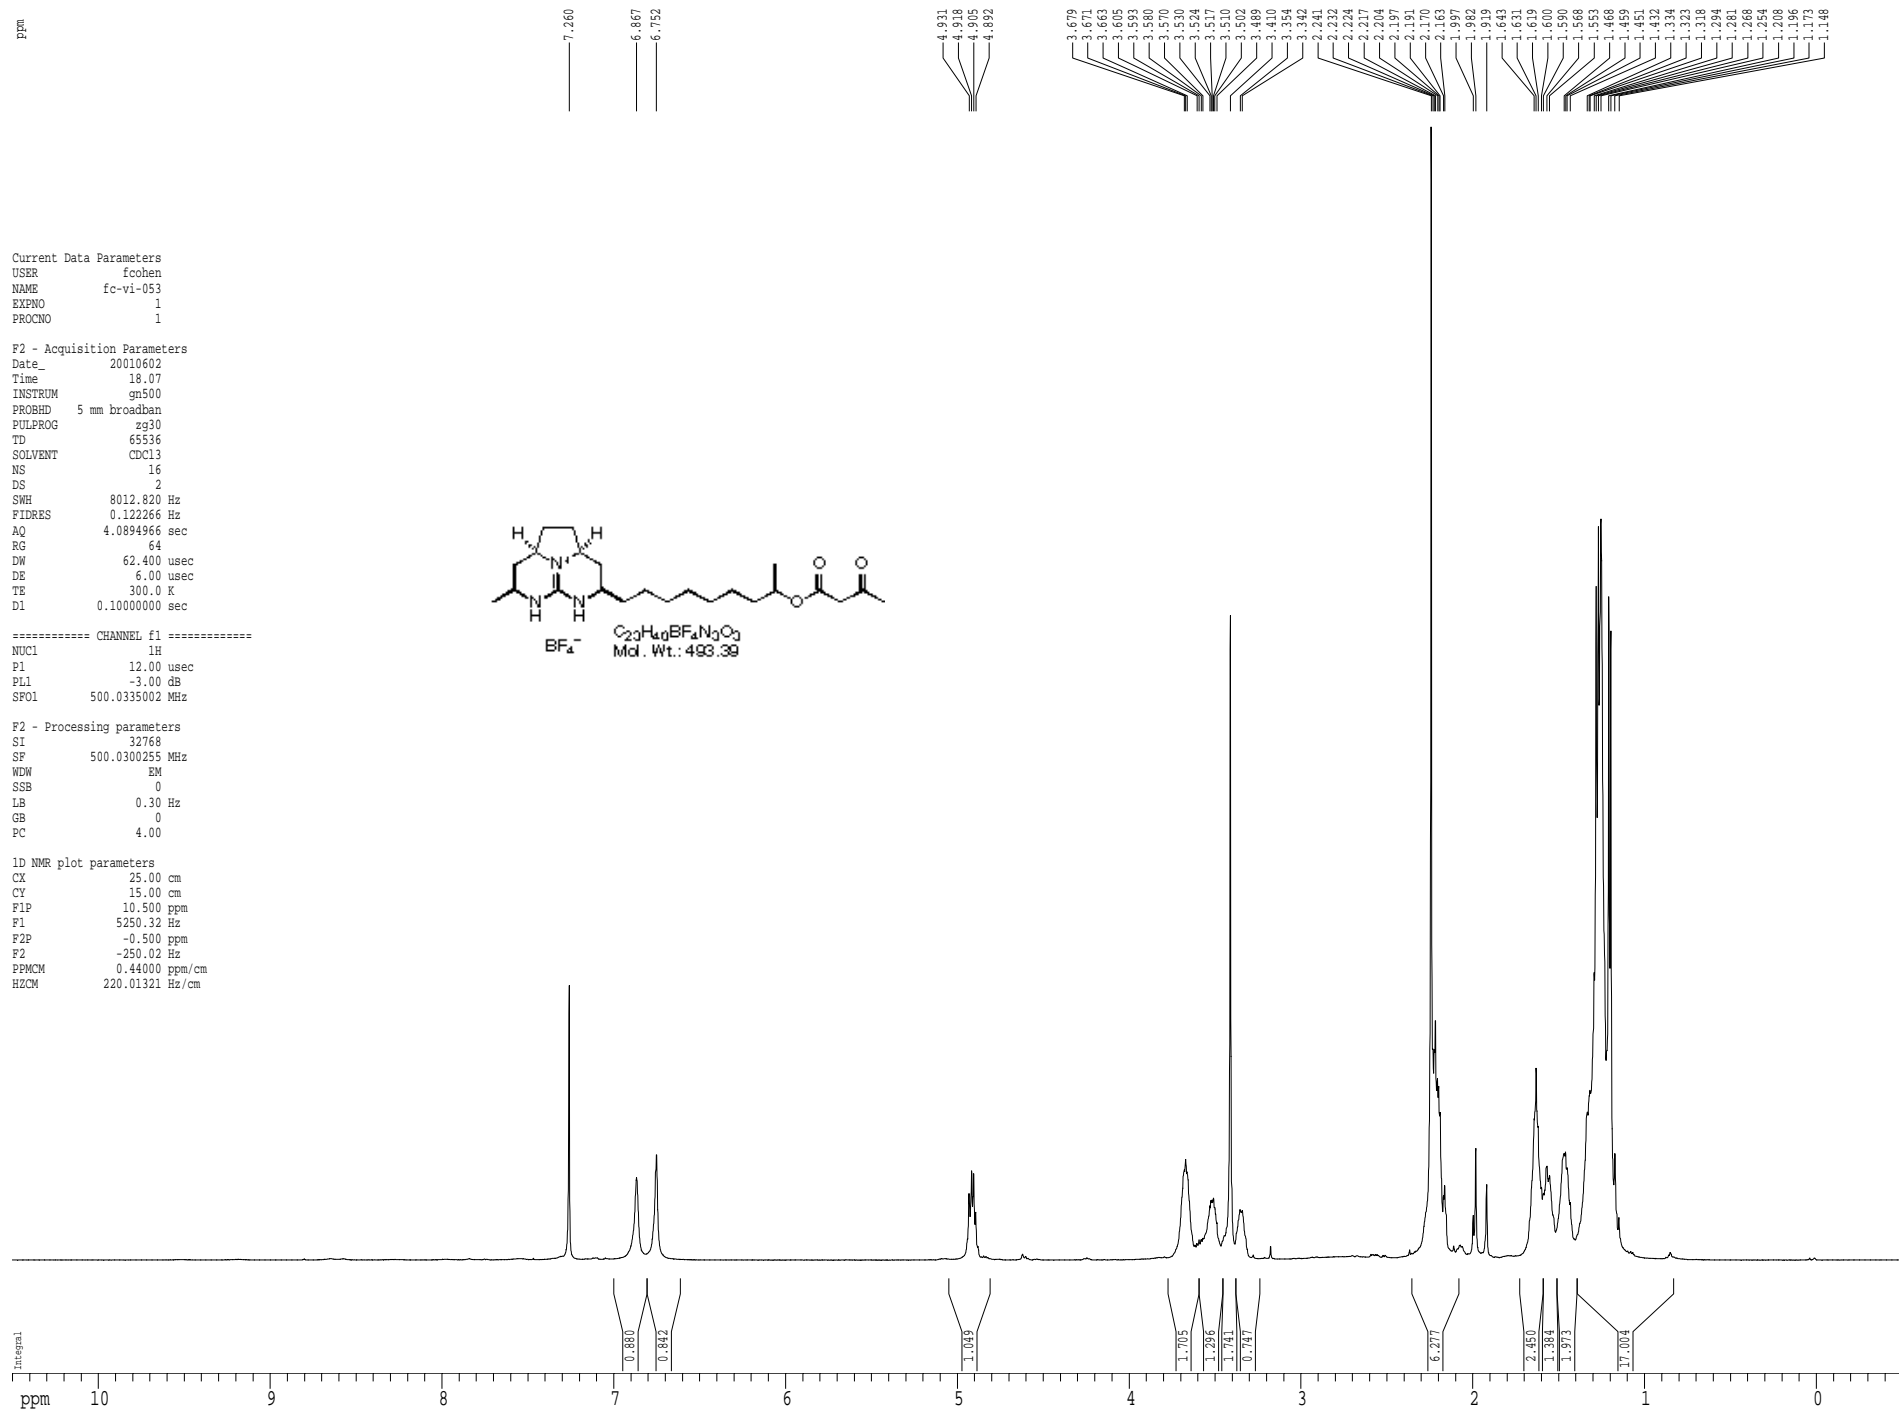

<sup>13</sup>C spectrum with <sup>1</sup>H decoupling

ppm

151.07

Current Data Parameters  
USER fcohen  
NAME fc-vi-054  
EXPNO 2  
PROCNO 1

F2 - Acquisition Parameters  
Date\_ 20010604  
Time 15.25  
INSTRUM gn500  
PROBHD 5 mm broadband  
PULPROG zgdc30  
TD 65536  
SOLVENT CDCl3  
NS 910  
DS 2  
SWH 30303.031 Hz  
FIDRES 0.462388 Hz  
AQ 1.0813940 sec  
RG 4597.6  
DW 16.500 usec  
DE 4.50 usec  
TE 300.0 K  
D1 0.25000000 sec  
D11 0.03000000 sec

==== CHANNEL f1 =====  
NUC1 13C  
P1 6.25 usec  
PL1 0.00 dB  
SFO1 125.7464486 MHz

==== CHANNEL f2 =====  
CPDPRG2 waltz16  
NUC2 1H  
PCPD2 80.00 usec  
PL2 -3.00 dB  
PL12 13.50 dB  
SFO2 500.0335002 MHz

F2 - Processing parameters  
SI 65536  
SF 125.7324692 MHz  
WDW EM  
SSB 0  
LB 1.00 Hz  
GB 0  
PC 2.00

1D NMR plot parameters  
CX 25.00 cm  
CY 15.65 cm  
F1P 200.000 ppm  
F1 25146.49 Hz  
F2P 0.000 ppm  
F2 0.00 Hz  
PPMCM 8.00000 ppm/cm  
HZCM 1005.85974 Hz/cm

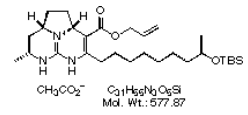

68.54  
57.52  
57.47  
56.48  
56.37  
51.18  
51.13  
50.15  
49.31  
49.17  
49.10  
48.83  
48.66  
48.49  
47.27  
40.15  
36.86  
36.66  
36.38  
35.83  
34.71  
34.29  
31.79  
31.02  
30.99  
30.67  
30.53  
30.46  
28.62  
28.51  
23.51  
21.67  
20.72

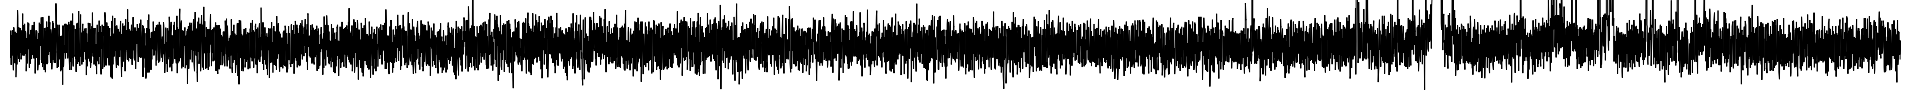

ppm 180 160 140 120 100 80 60 40 20

1H spectrum

ppm

Current Data Parameters  
USER fcoben  
NAME fc-vi-054  
EXPNO 1  
PROCNO 1

F2 - Acquisition Parameters  
Date\_ 20010604  
Time 15.03  
INSTRUM gn500  
PROBHD 5 mm broadband  
PULPROG zg30  
TD 65536  
SOLVENT CDCl3  
NS 8  
DS 2  
SWH 8012.820 Hz  
FIDRES 0.122266 Hz  
AQ 4.0894966 sec  
RG 90.5  
DW 62.400 usec  
DE 6.00 usec  
TE 300.0 K  
D1 0.10000000 sec

===== CHANNEL f1 =====  
NUC1 1H  
P1 12.00 usec  
PL1 -3.00 dB  
SFO1 500.0335002 MHz

F2 - Processing parameters  
SI 32768  
SF 500.0300132 MHz  
WDW EM  
SSB 0  
LB 0.30 Hz  
GB 0  
PC 4.00

1D NMR plot parameters  
CX 25.00 cm  
CY 15.00 cm  
F1P 10.500 ppm  
F1 5250.31 Hz  
F2P -0.500 ppm  
F2 -250.01 Hz  
PPMCM 0.44000 ppm/cm  
HZCM 220.01320 Hz/cm

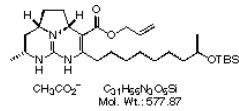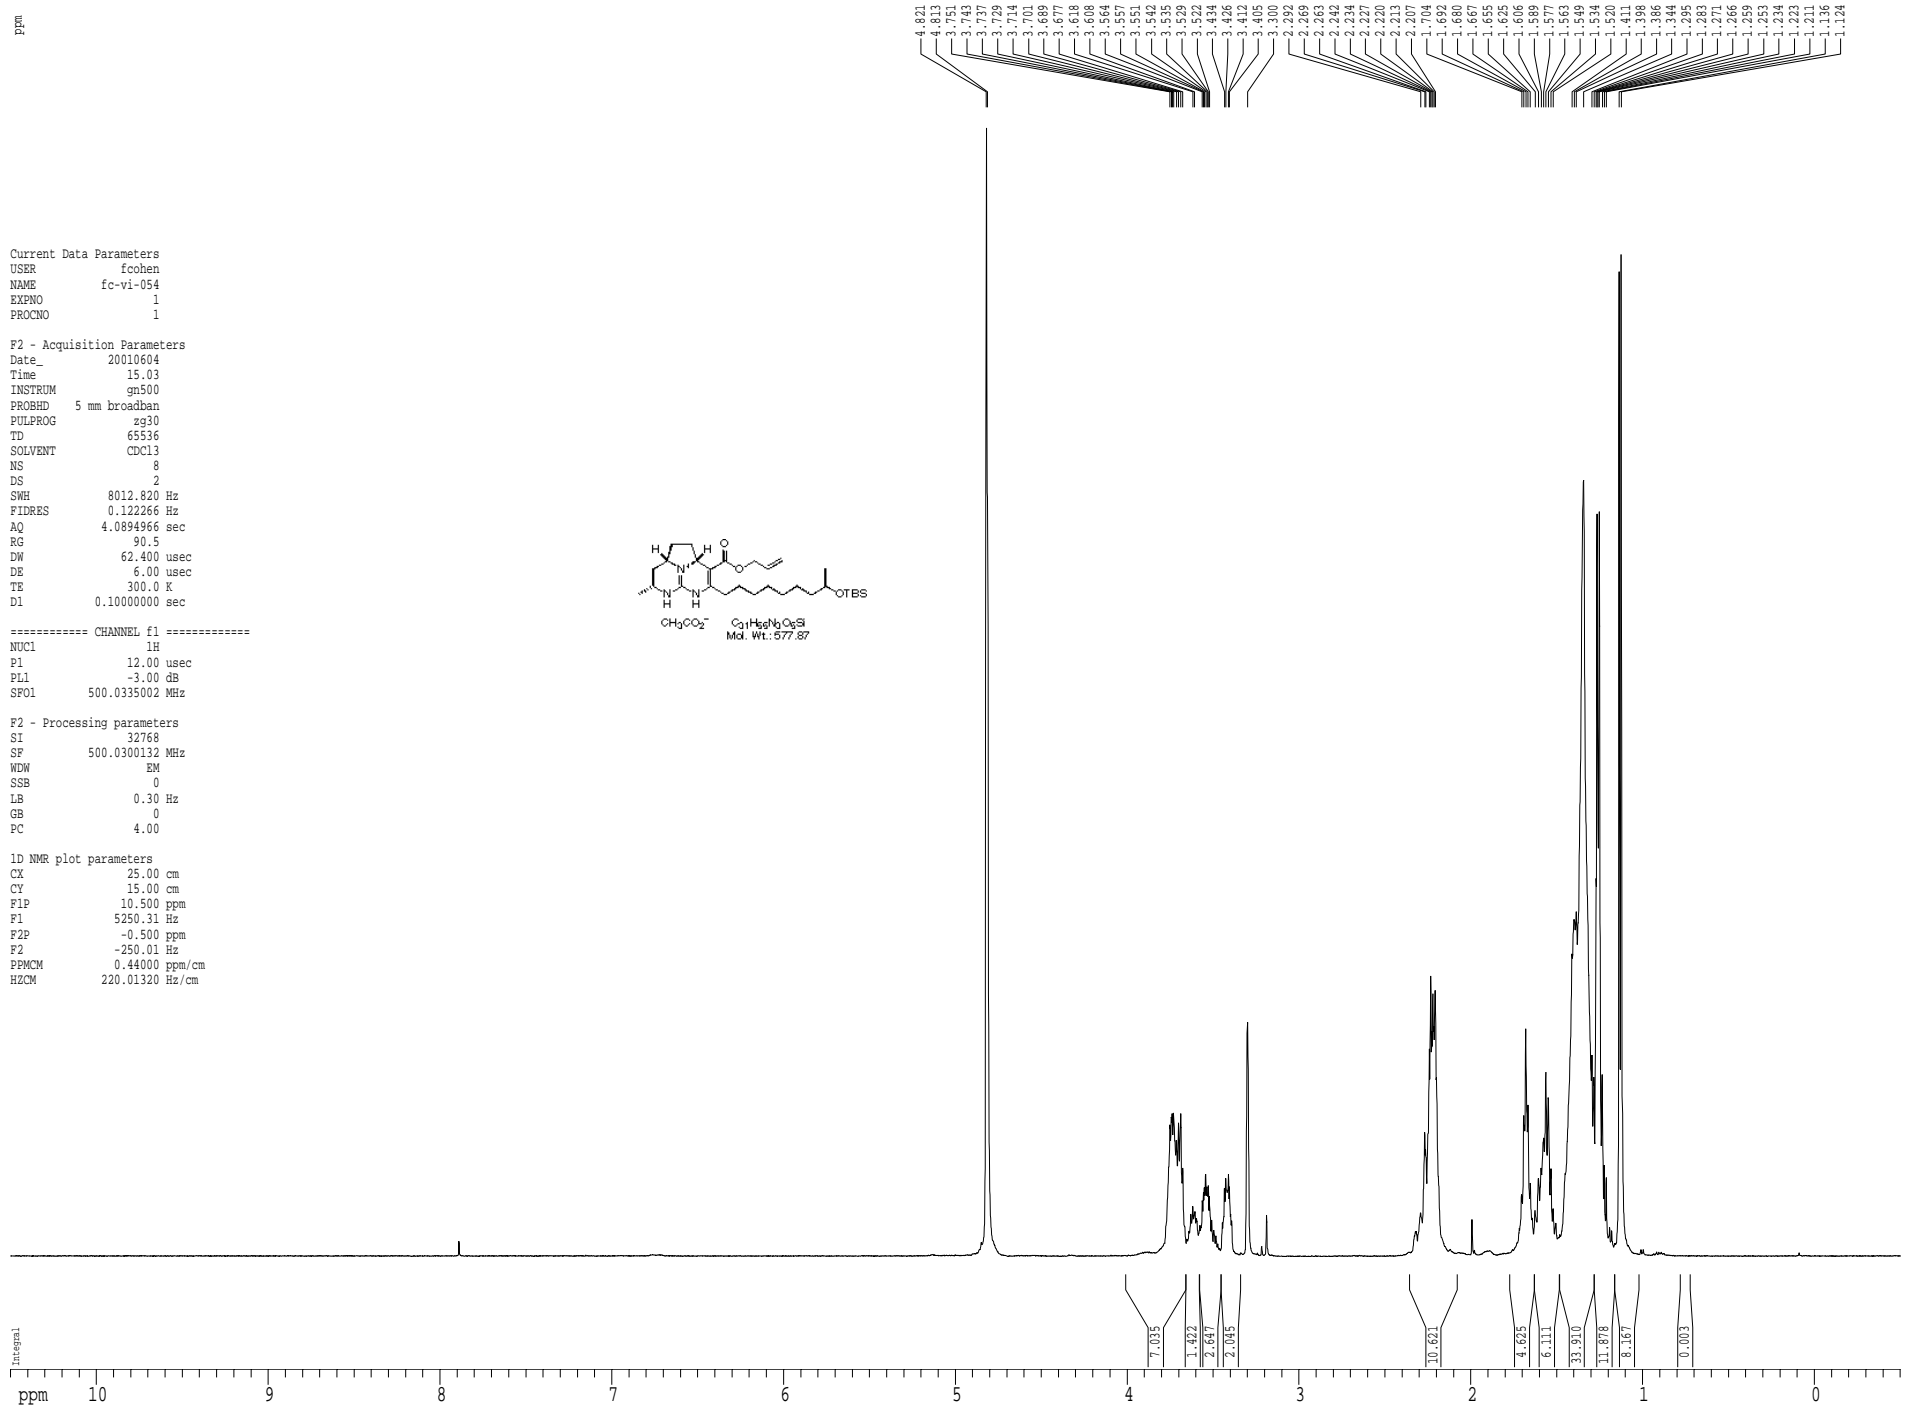

<sup>13</sup>C spectrum with <sup>1</sup>H decoupling

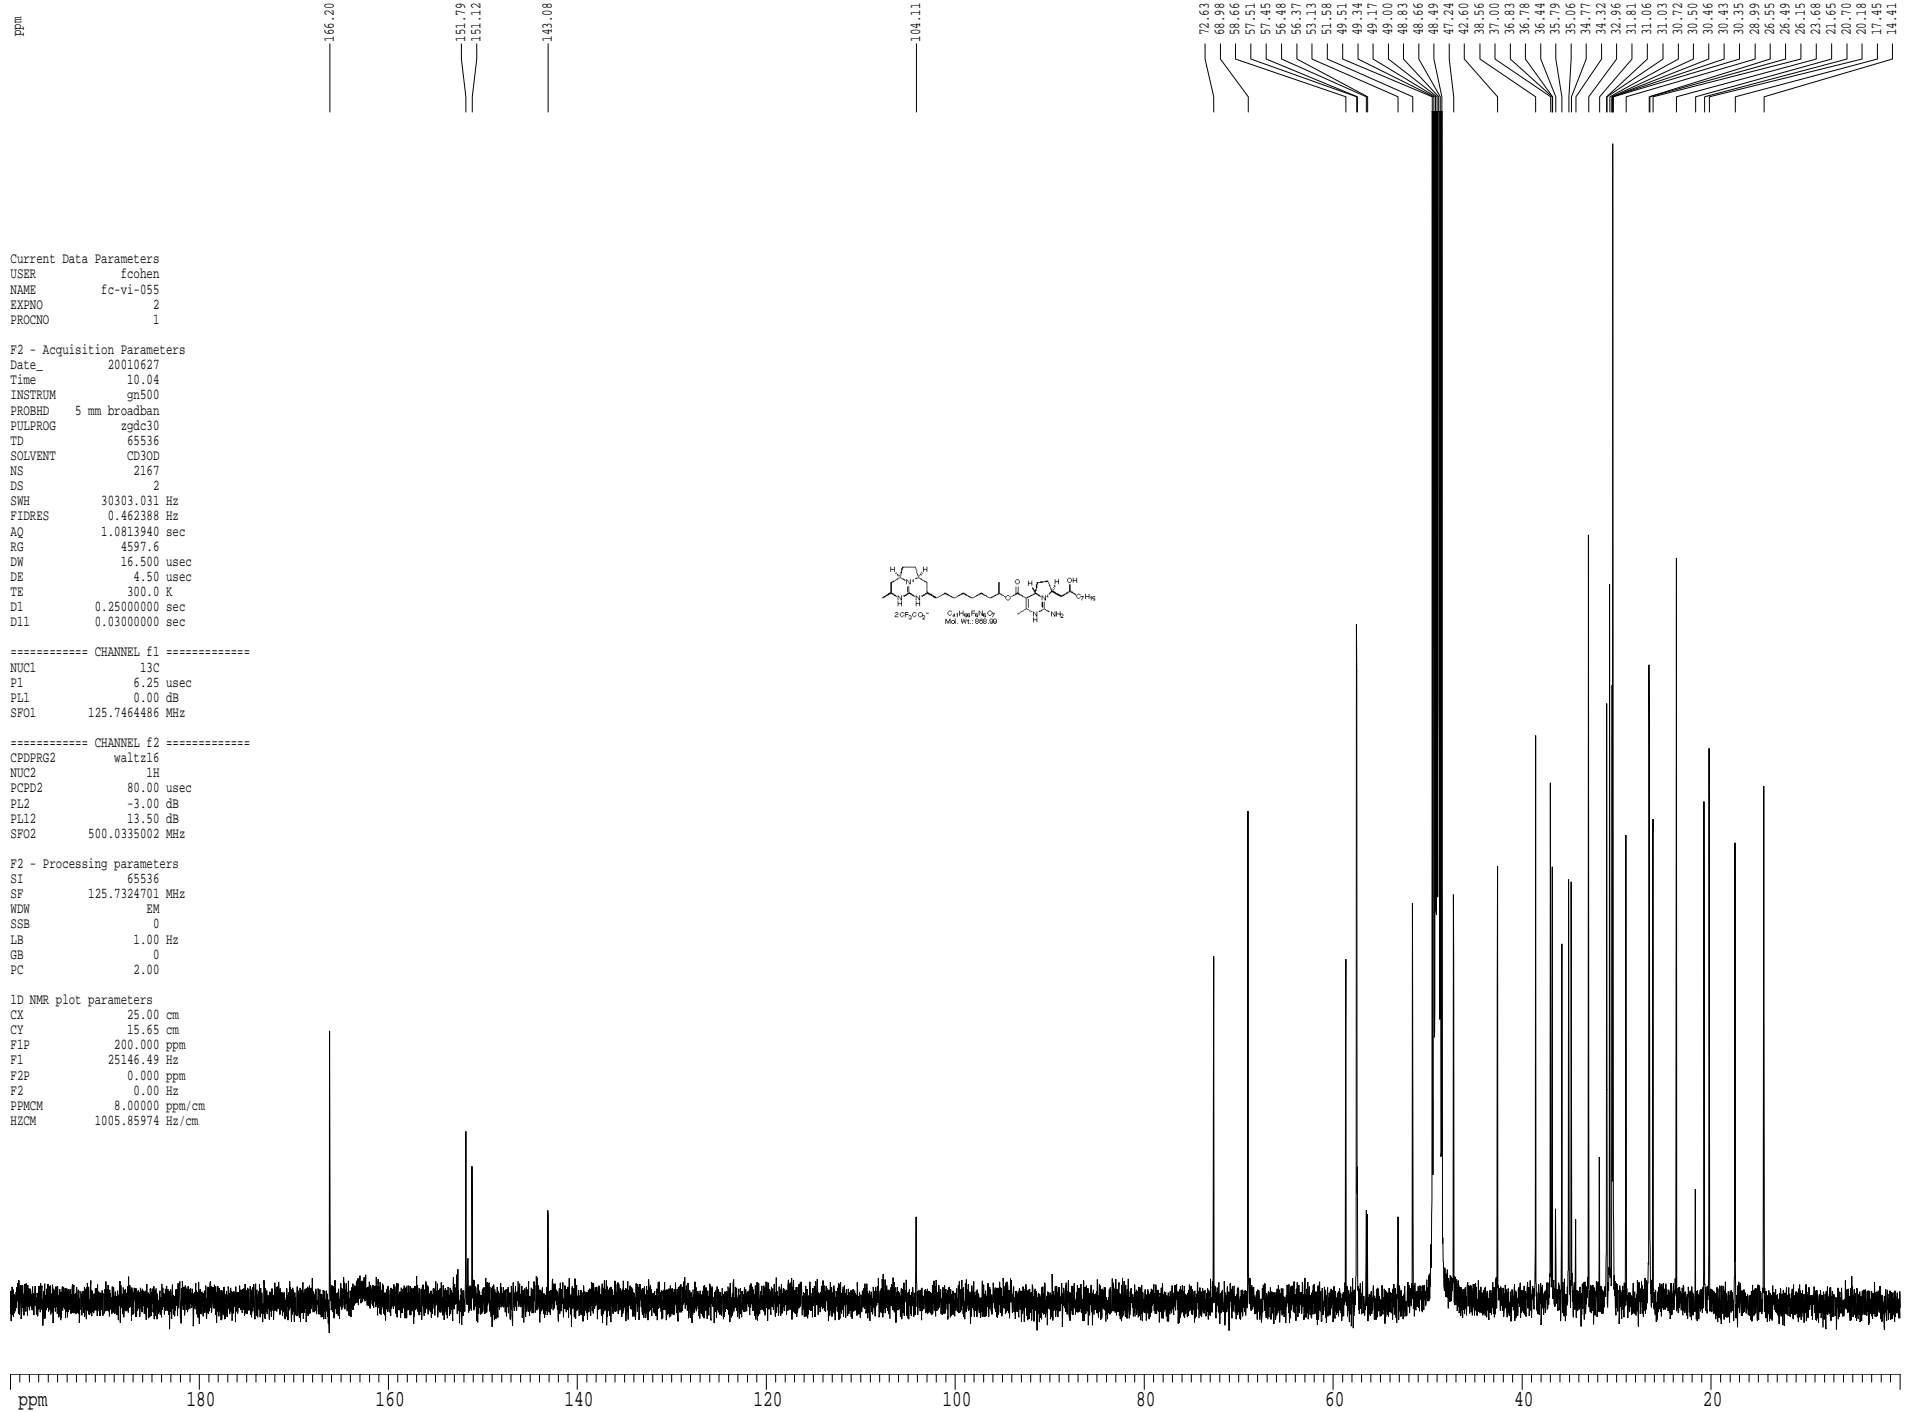

Current Data Parameters  
USER fcoben  
NAME fc-vi-055  
EXPNO 2  
PROCNO 1

F2 - Acquisition Parameters  
Date\_ 20010627  
Time 10.04  
INSTRUM gn500  
PROBHD 5 mm broadband  
PULPROG zgdc30  
TD 65536  
SOLVENT CD3OD  
NS 2167  
DS 2  
SWH 30303.031 Hz  
FIDRES 0.462388 Hz  
AQ 1.0813940 sec  
RG 4597.6  
DW 16.500 usec  
DE 4.500 usec  
TE 300.0 K  
D1 0.25000000 sec  
D11 0.03000000 sec

==== CHANNEL f1 =====  
NUC1 13C  
P1 6.25 usec  
PL1 0.00 dB  
SFO1 125.7464486 MHz

==== CHANNEL f2 =====  
CPDPRG2 waltz16  
NUC2 1H  
PCPD2 80.00 usec  
PL2 -3.00 dB  
PL12 13.50 dB  
SFO2 500.0335002 MHz

F2 - Processing parameters  
SI 65536  
SF 125.7324701 MHz  
WDW EM  
SSB 0  
LB 1.00 Hz  
GB 0  
PC 2.00

1D NMR plot parameters  
CX 25.00 cm  
CY 15.65 cm  
FID 200.000 ppm  
F1 25146.49 Hz  
F2P 0.000 ppm  
F2 0.00 Hz  
PPMCM 8.00000 ppm/cm  
HZCM 1005.85974 Hz/cm



<sup>1</sup>H spectrum

ppm

Current Data Parameters  
USER fcohen  
NAME fc-vi-055  
EXPNO 1  
PROCNO 1

F2 - Acquisition Parameters  
Date\_ 20010627  
Time 9.15  
INSTRUM gn500  
PROBHD 5 mm broadband  
PULPROG zg30  
TD 65536  
SOLVENT CDCl3  
NS 16  
DS 2  
SWH 8012.820 Hz  
FIDRES 0.122266 Hz  
AQ 4.0894966 sec  
RG 90.5  
DW 62.400 usec  
DE 6.000 usec  
TE 300.0 K  
D1 0.10000000 sec

===== CHANNEL f1 =====  
NUC1 1H  
P1 12.00 usec  
PL1 -3.00 dB  
SFO1 500.0335002 MHz

F2 - Processing parameters  
SI 32768  
SF 500.0300176 MHz  
WDW EM  
SSB 0  
LB 0.30 Hz  
GB 0  
PC 4.00

1D NMR plot parameters  
CX 25.00 cm  
CY 15.00 cm  
F1P 10.500 ppm  
F1 5250.32 Hz  
F2P -0.500 ppm  
F2 -250.02 Hz  
PPMCM 0.44000 ppm/cm  
HZCM 220.01321 Hz/cm

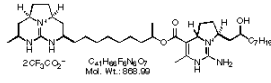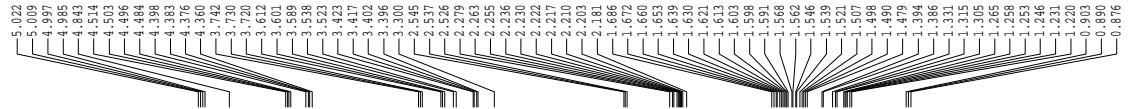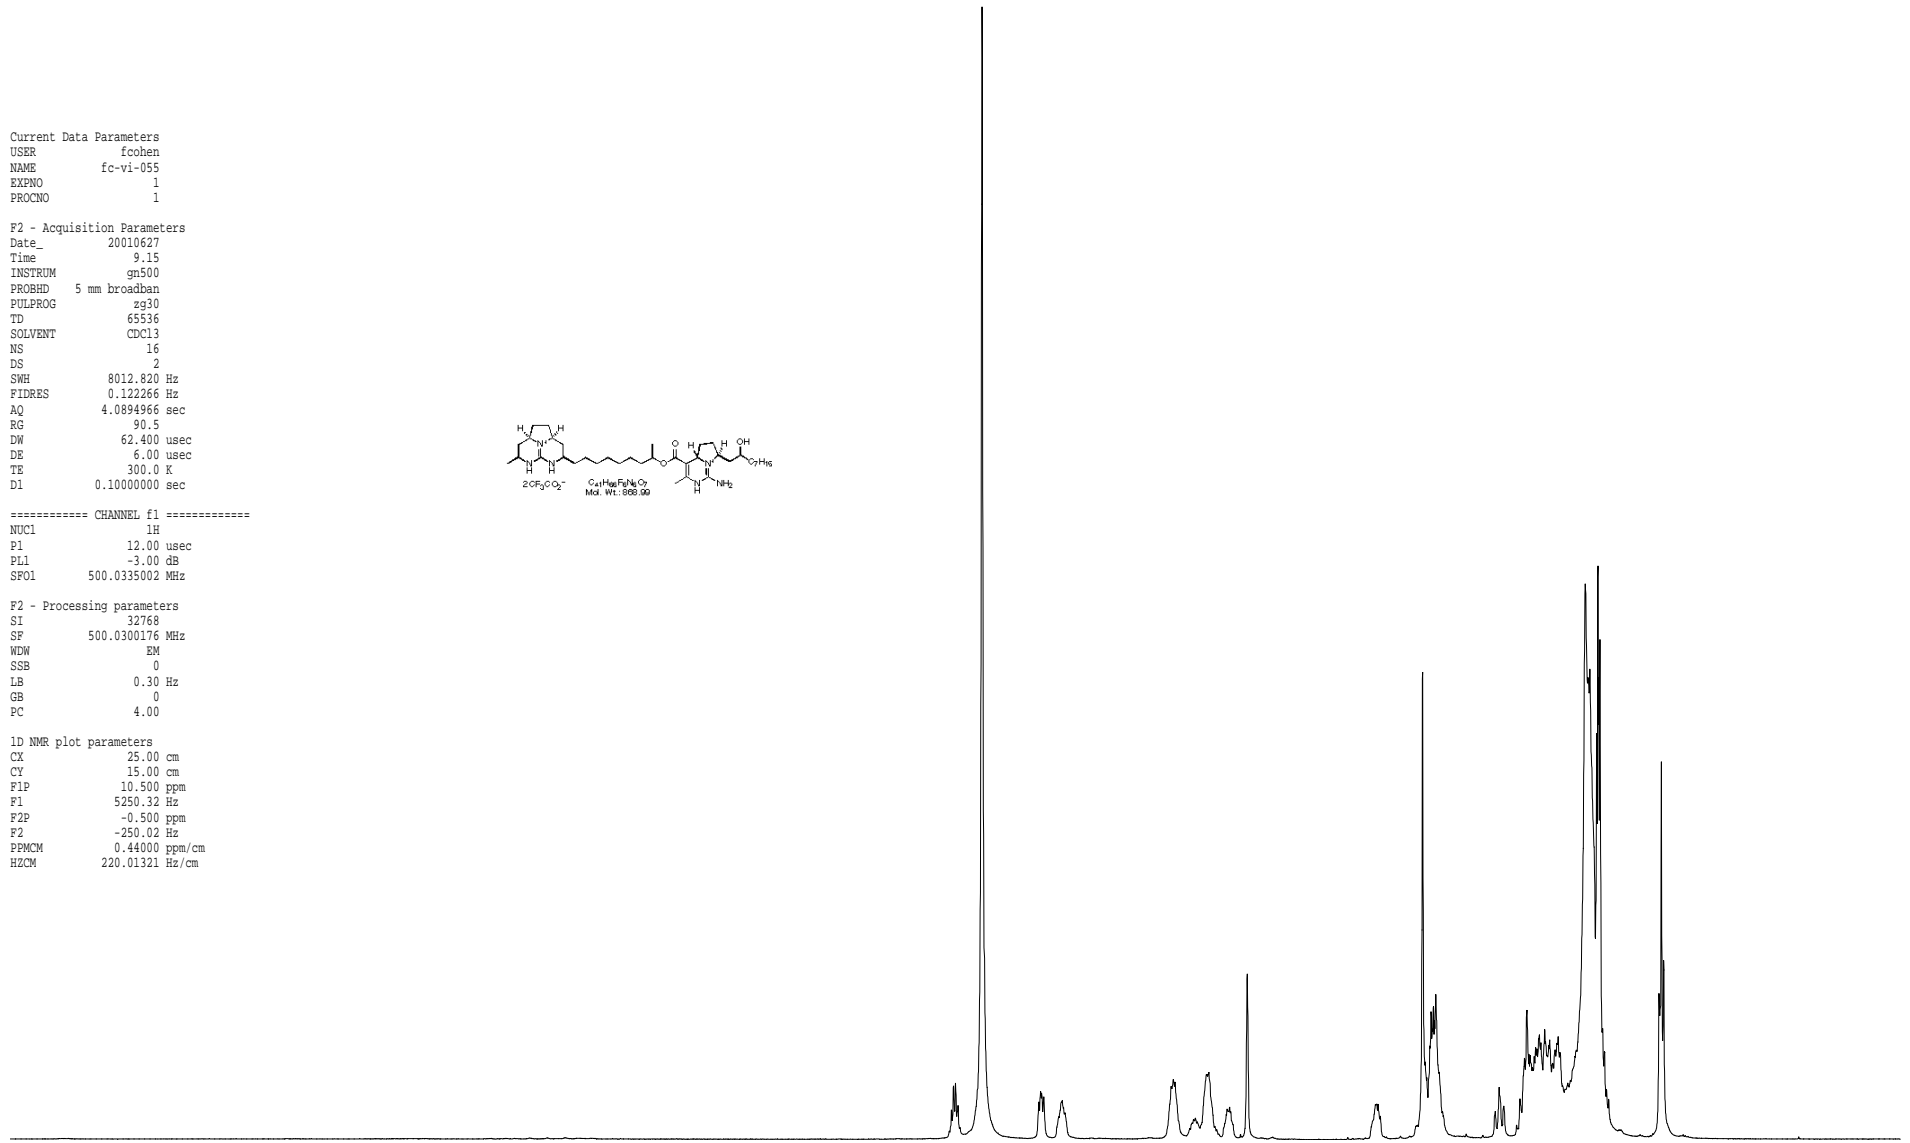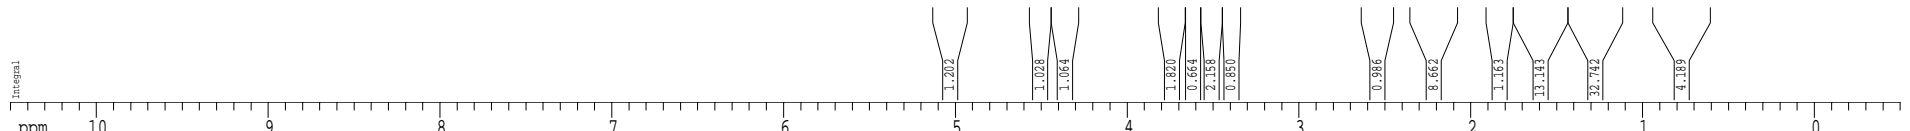

<sup>13</sup>C spectrum with <sup>1</sup>H decoupling

ppm

166.75

149.22

77.26  
77.20  
77.00  
76.75  
72.25

55.98  
55.87  
50.34  
50.29  
45.97

35.65  
35.56  
34.32  
33.55  
30.14  
30.09  
30.07  
29.03  
25.06  
24.83  
24.76  
20.13  
19.73

Current Data Parameters  
USER fcohen  
NAME fc-vi-056  
EXPNO 2  
PROCNO 1

F2 - Acquisition Parameters  
Date\_ 20010607  
Time 11.54  
INSTRUM gn500  
PROBHD 5 mm broadband  
PULPROG zgdc30  
TD 65536  
SOLVENT CDCl3  
NS 1000  
DS 2  
SWH 30303.031 Hz  
FIDRES 0.462388 Hz  
AQ 1.0813940 sec  
RG 4597.6  
DW 16.500 usec  
DE 4.50 usec  
TE 300.0 K  
D1 0.25000000 sec  
D11 0.03000000 sec

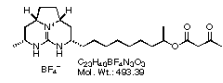

==== CHANNEL f1 =====  
NUC1 13C  
P1 6.25 usec  
PL1 0.00 dB  
SFO1 125.7464486 MHz

==== CHANNEL f2 =====  
CPDPRG2 waltz16  
NUC2 1H  
PCPD2 80.00 usec  
PL2 -3.00 dB  
PL12 13.50 dB  
SFO2 500.0335002 MHz

F2 - Processing parameters  
SI 65536  
SF 125.7326598 MHz  
WDM EM  
SSB 0  
LB 1.00 Hz  
GB 0  
PC 2.00

1D NMR plot parameters  
CX 25.00 cm  
CY 15.65 cm  
FID 220.000 ppm  
F1 27661.19 Hz  
F2P -10.838 ppm  
F2 -1362.72 Hz  
PPMCM 9.23353 ppm/cm  
HZCM 1160.95605 Hz/cm

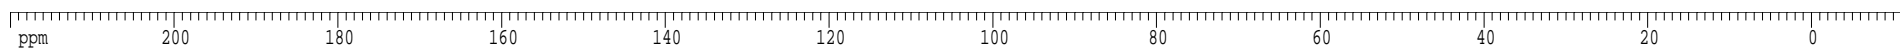

## 1H spectrum

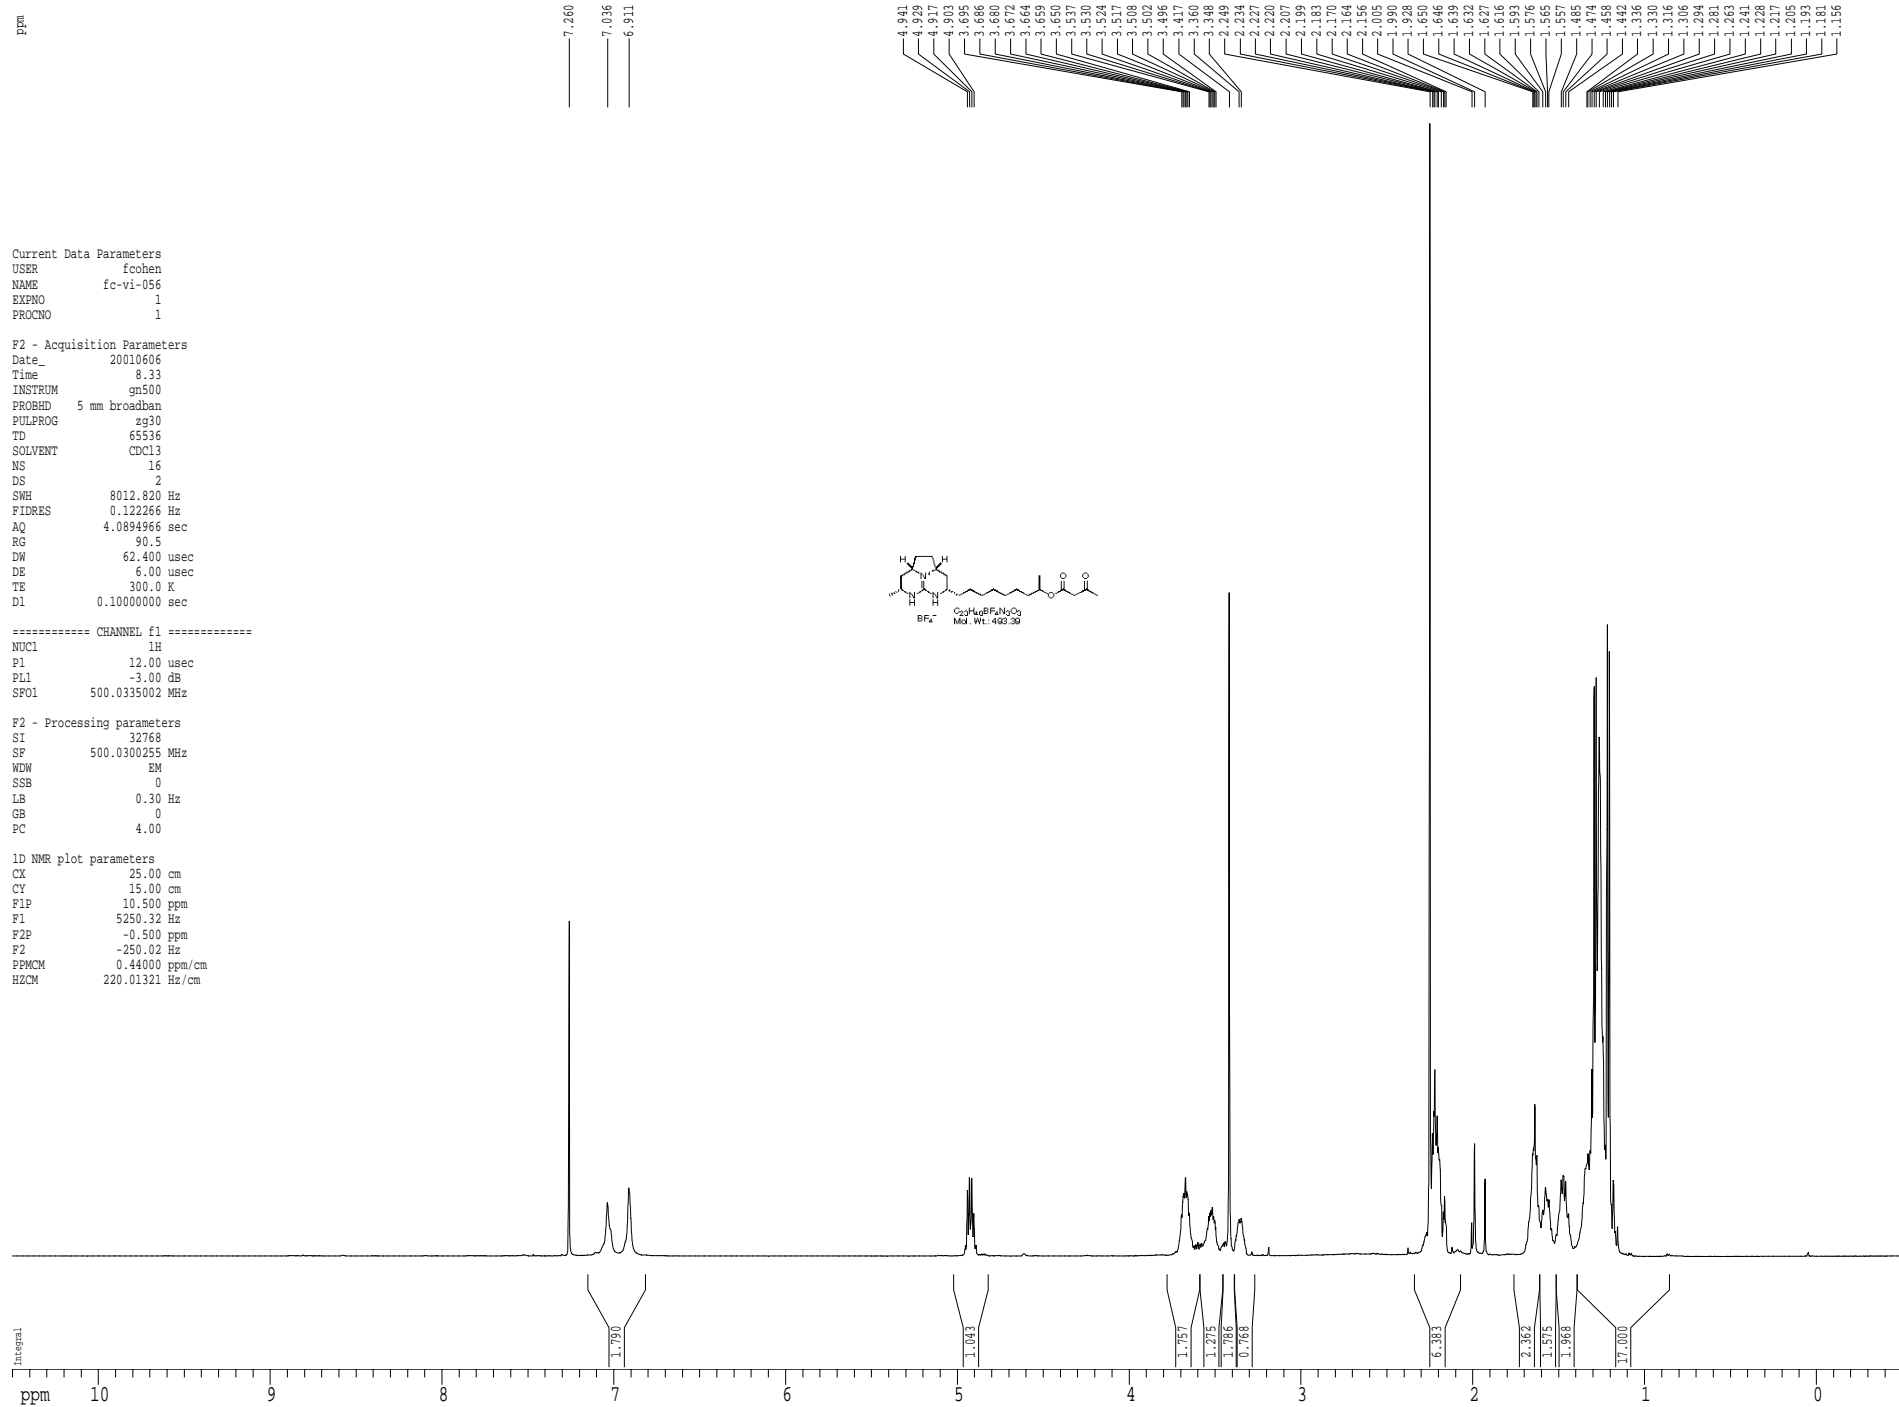

<sup>13</sup>C spectrum with <sup>1</sup>H decoupling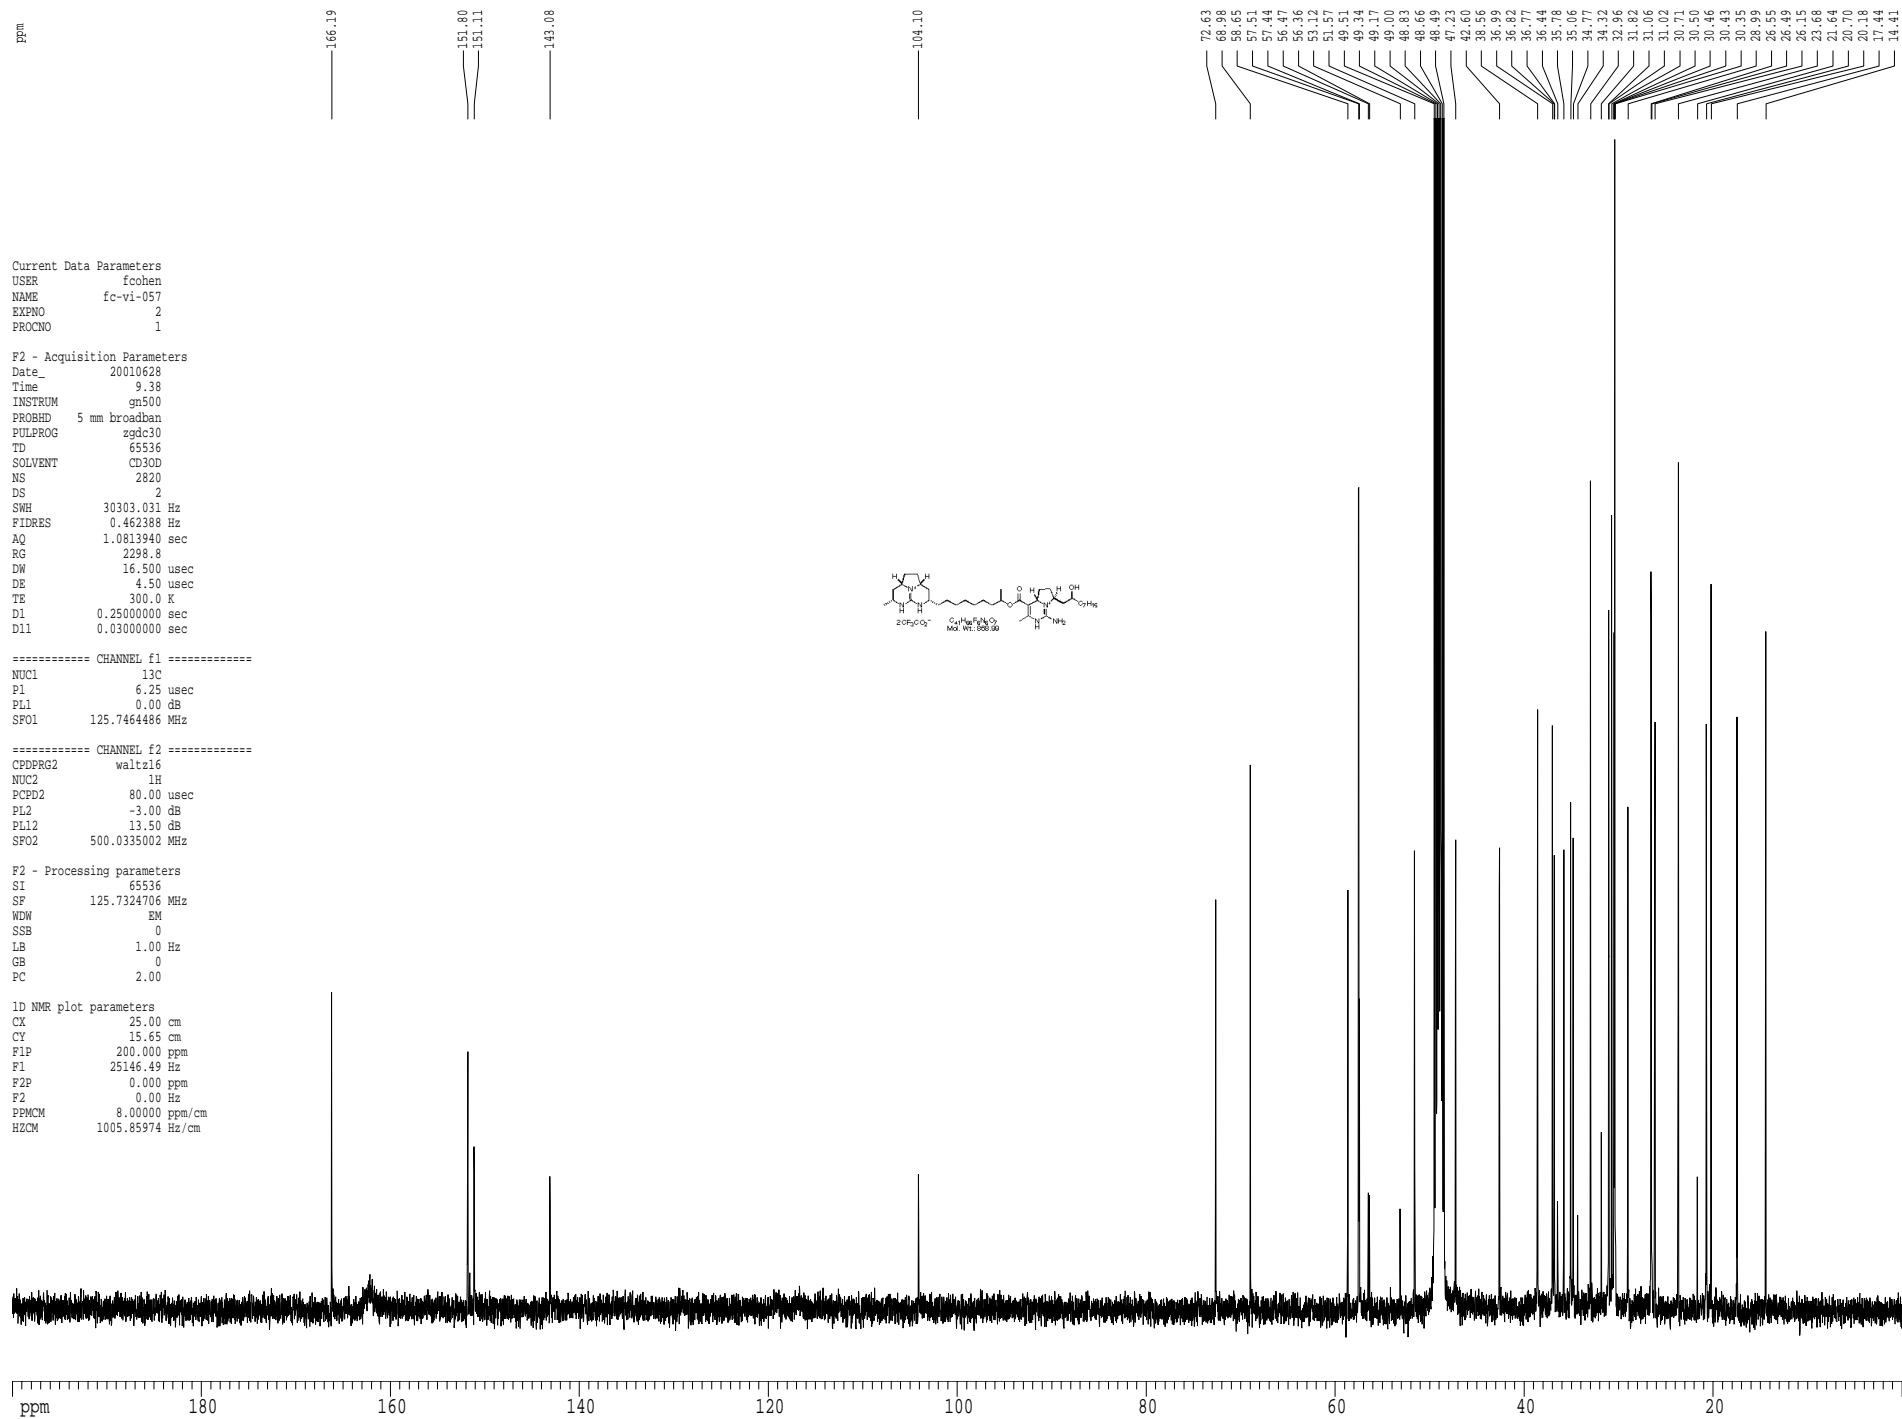

## 1H spectrum

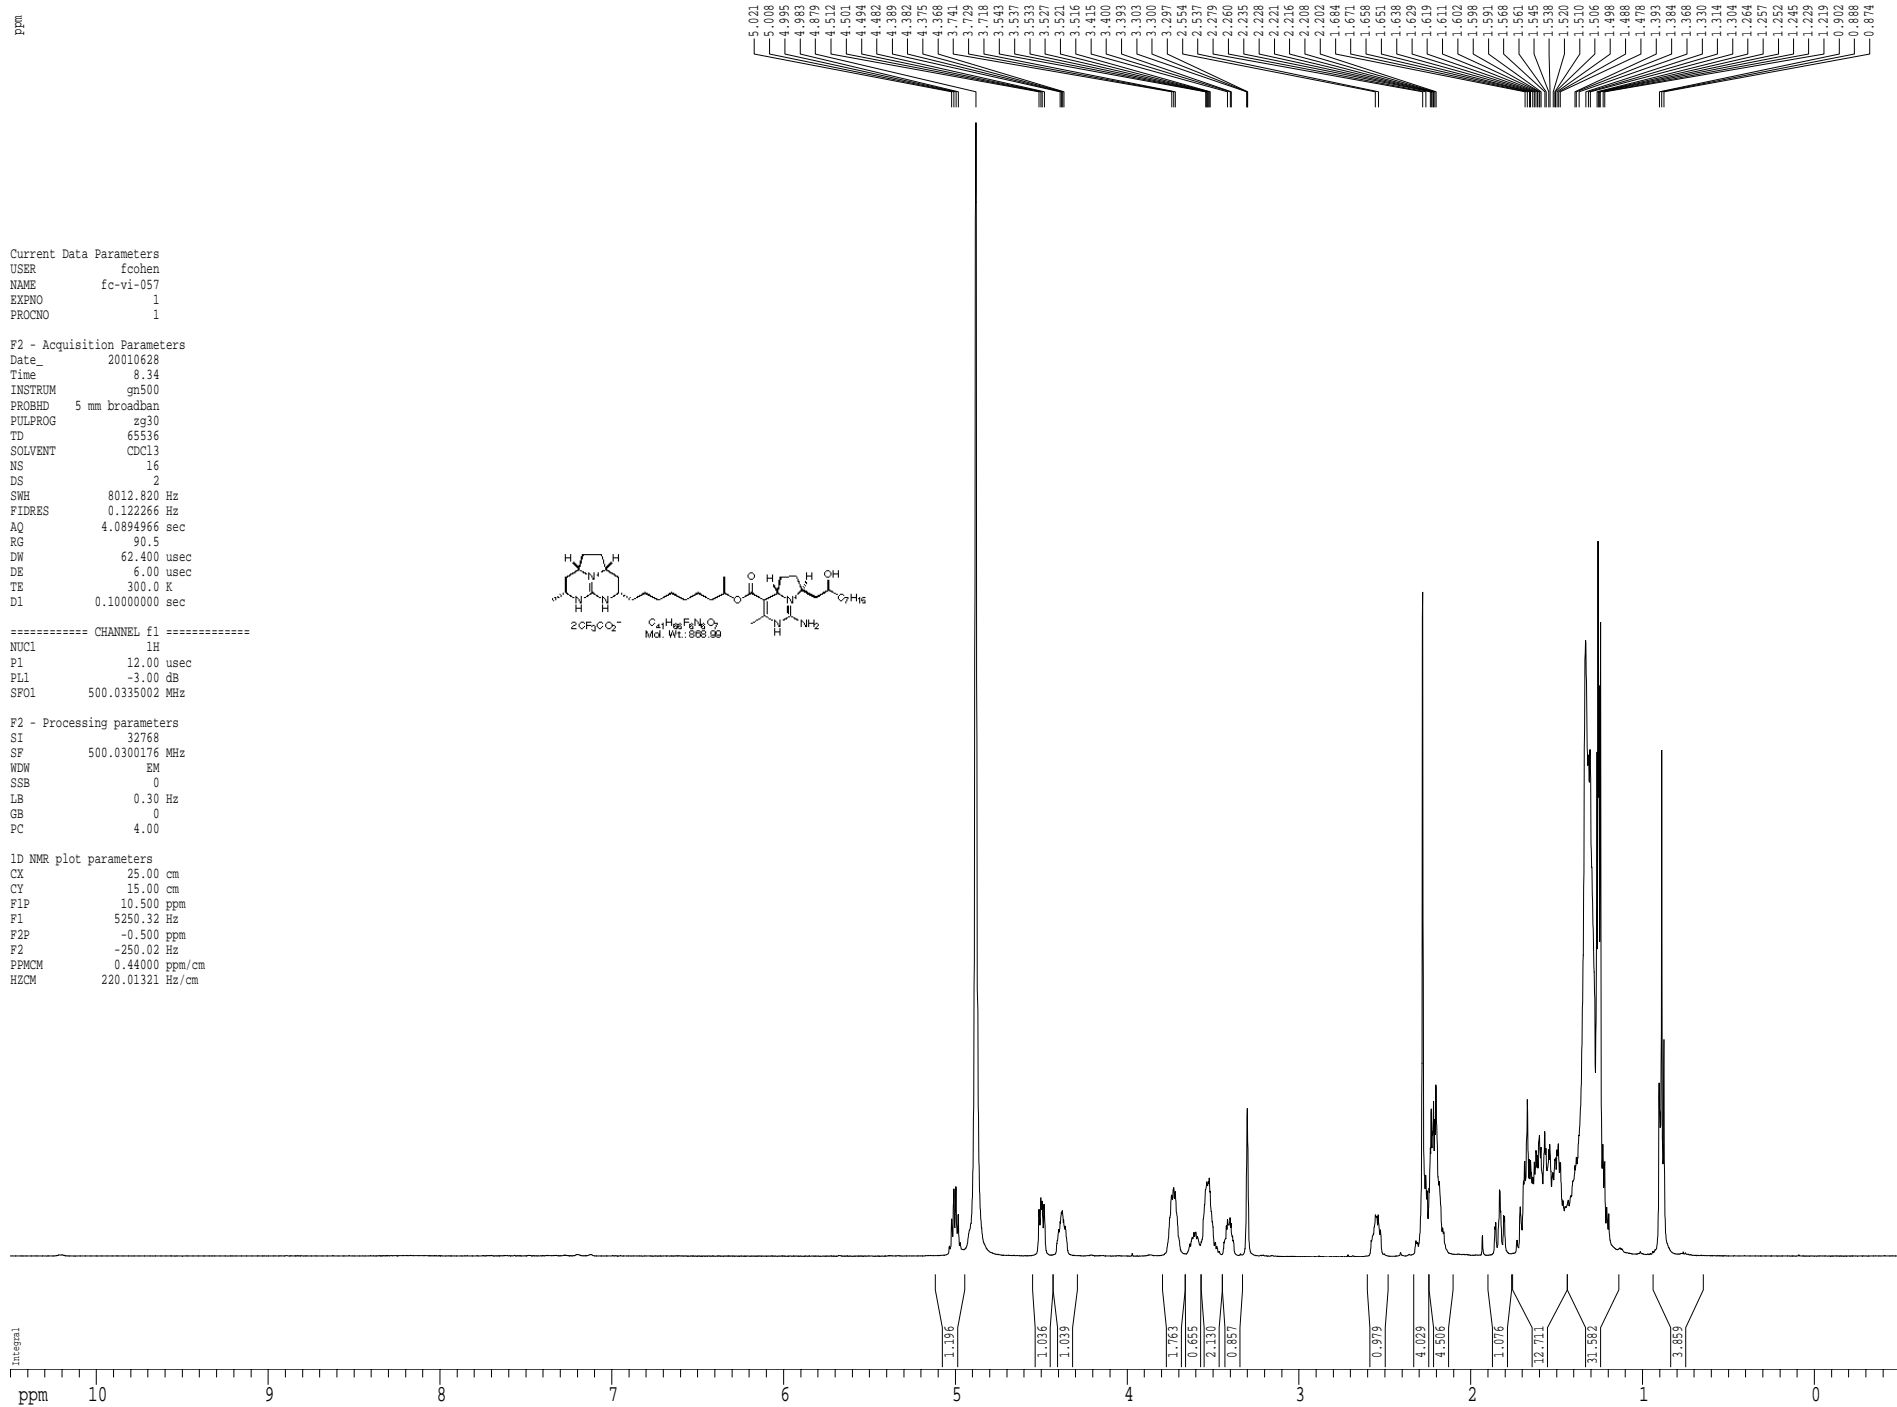

<sup>13</sup>C spectrum with <sup>1</sup>H decoupling

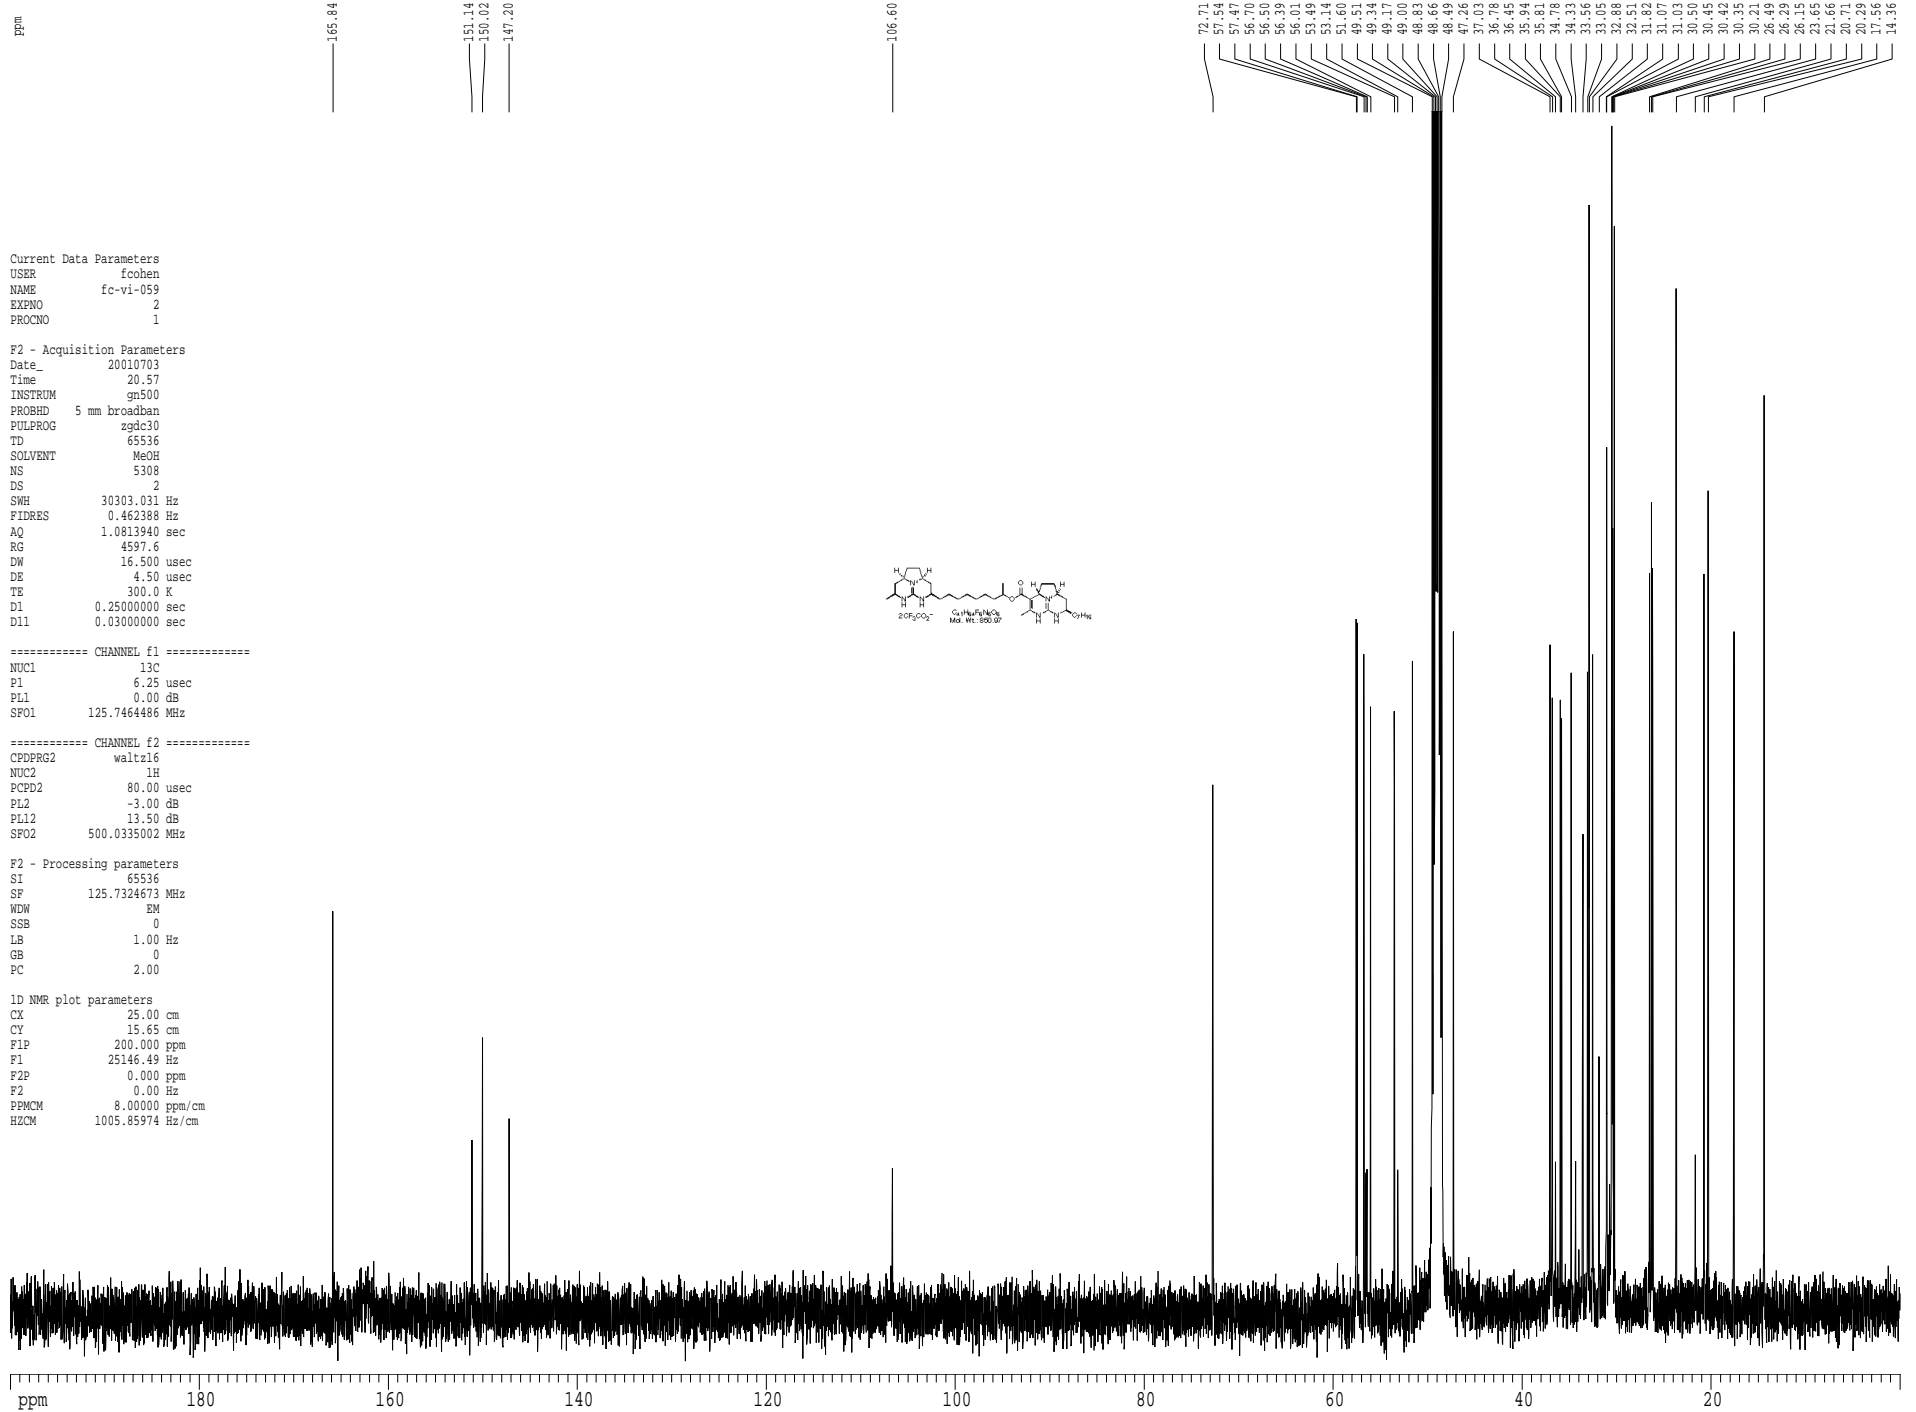

Current Data Parameters  
 USER fcoben  
 NAME fc-vi-059  
 EXPNO 2  
 PROCNO 1

F2 - Acquisition Parameters  
 Date\_ 20010703  
 Time 20.57  
 INSTRUM gn500  
 PROBHD 5 mm broadband  
 PULPROG zgdc30  
 TD 65536  
 SOLVENT MeOH  
 NS 5308  
 DS 2  
 SWH 30303.031 Hz  
 FIDRES 0.462388 Hz  
 AQ 1.0813940 sec  
 RG 4597.6  
 DW 16.500 usec  
 DE 4.50 usec  
 TE 300.0 K  
 D1 0.25000000 sec  
 D11 0.03000000 sec

==== CHANNEL f1 =====  
 NUC1 13C  
 P1 6.25 usec  
 PL1 0.00 dB  
 SFO1 125.7464486 MHz

==== CHANNEL f2 =====  
 CPDPRG2 waltz16  
 NUC2 1H  
 PCPD2 80.00 usec  
 PL2 -3.00 dB  
 PL12 13.50 dB  
 SFO2 500.0335002 MHz

F2 - Processing parameters  
 SI 65536  
 SF 125.7324673 MHz  
 WDM EM  
 SSB 0  
 LB 1.00 Hz  
 GB 0  
 PC 2.00

1D NMR plot parameters  
 CX 25.00 cm  
 CY 15.65 cm  
 FID 200.000 ppm  
 F1 25146.49 Hz  
 F2P 0.000 ppm  
 F2 0.00 Hz  
 PPMCM 8.00000 ppm/cm  
 HZCM 1005.85974 Hz/cm

## 1H spectrum

ppm

Current Data Parameters  
 USER fcobhen  
 NAME fc-vi-059  
 EXPNO 1  
 PROCNO 1

F2 - Acquisition Parameters  
 Date\_ 20010703  
 Time 10.07  
 INSTRUM gn500  
 PROBHD 5 mm broadband  
 PULPROG zg30  
 TD 65536  
 SOLVENT MeOH  
 NS 64  
 DS 2  
 SWH 8012.820 Hz  
 FIDRES 0.122266 Hz  
 AQ 4.0894966 sec  
 RG 203.2  
 DW 62.400 usec  
 DE 6.00 usec  
 TE 300.0 K  
 D1 0.10000000 sec

===== CHANNEL f1 =====  
 NUC1 1H  
 P1 12.00 usec  
 PL1 -3.00 dB  
 SFO1 500.0335002 MHz

F2 - Processing parameters  
 SI 32768  
 SF 500.0300129 MHz  
 WDW EM  
 SSB 0  
 LB 0.30 Hz  
 GB 0  
 PC 4.00

1D NMR plot parameters  
 CX 25.00 cm  
 CY 15.00 cm  
 F1P 10.500 ppm  
 F1 5250.31 Hz  
 F2P -0.500 ppm  
 F2 -250.01 Hz  
 PPMCM 0.44000 ppm/cm  
 HZCM 220.01320 Hz/cm

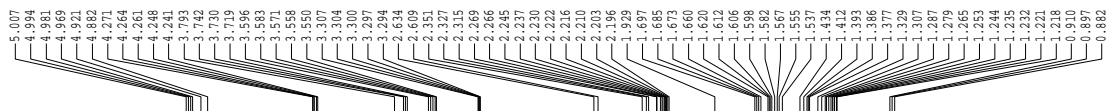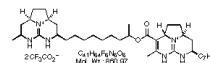

Integral

ppm

10

9

8

7

6

5

4

3

2

1

0

0

1.156

0.981

2.933

2.915

0.883

0.993

2.397

3.337

3.246

1.171

3.837

6.087

34.585

3.966

<sup>13</sup>C spectrum with <sup>1</sup>H decoupling

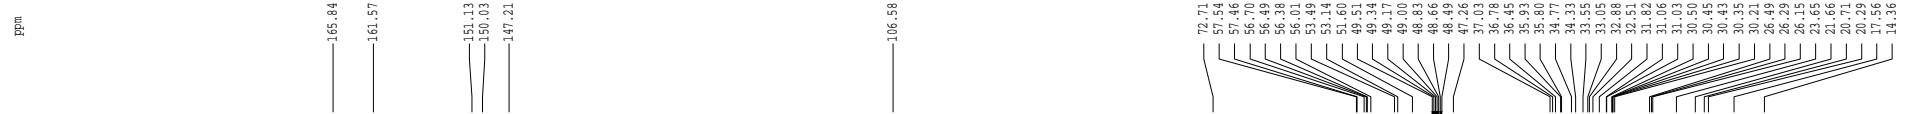

Current Data Parameters  
 USER fcohen  
 NAME fc-vi-062  
 EXPNO 2  
 PROCNO 1

F2 - Acquisition Parameters  
 Date\_ 20010704  
 Time 9.45  
 INSTRUM gn500  
 PROBHD 5 mm broadband  
 PULPROG zgdc30  
 TD 65536  
 SOLVENT MeOH  
 NS 4652  
 DS 2  
 SWH 30303.031 Hz  
 FIDRES 0.462388 Hz  
 AQ 1.0813940 sec  
 RG 4597.6  
 DW 16.500 usec  
 DE 4.50 usec  
 TE 300.0 K  
 D1 0.25000000 sec  
 D11 0.03000000 sec

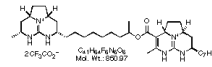

==== CHANNEL f1 =====  
 NUC1 13C  
 P1 6.25 usec  
 PL1 0.00 dB  
 SFO1 125.7464486 MHz

==== CHANNEL f2 =====  
 CPDPRG2 waltz16  
 NUC2 1H  
 PCPD2 80.00 usec  
 PL2 -3.00 dB  
 PL12 13.50 dB  
 SFO2 500.0335002 MHz

F2 - Processing parameters  
 SI 65536  
 SF 125.7324673 MHz  
 WDM EM  
 SSB 0  
 LB 1.00 Hz  
 GB 0  
 PC 2.00

1D NMR plot parameters  
 CX 25.00 cm  
 CY 15.65 cm  
 FID 200.000 ppm  
 F1 25146.49 Hz  
 F2P 0.000 ppm  
 F2 0.00 Hz  
 PPMCM 8.00000 ppm/cm  
 HZCM 1005.85974 Hz/cm





## 1H spectrum

ppm

Current Data Parameters  
 USER fcoben  
 NAME fc-vi-062  
 EXPNO 1  
 PROCNO 1

F2 - Acquisition Parameters  
 Date\_ 20010704  
 Time 8.00  
 INSTRUM gn500  
 PROBHD 5 mm broadband  
 PULPROG zg30  
 TD 65536  
 SOLVENT CDCl3  
 NS 16  
 DS 2  
 SWH 8012.820 Hz  
 FIDRES 0.122266 Hz  
 AQ 4.0894966 sec  
 RG 90.5  
 DW 62.400 usec  
 DE 6.000 usec  
 TE 300.0 K  
 D1 0.10000000 sec

===== CHANNEL f1 =====  
 NUC1 1H  
 P1 12.00 usec  
 PL1 -3.00 dB  
 SFO1 500.0335002 MHz

F2 - Processing parameters  
 SI 32768  
 SF 500.0300132 MHz  
 WDW EM  
 SSB 0  
 LB 0.30 Hz  
 GB 0  
 PC 4.00

1D NMR plot parameters  
 CX 25.00 cm  
 CY 15.00 cm  
 F1P 10.500 ppm  
 F1 5250.31 Hz  
 F2P -0.500 ppm  
 F2 -250.01 Hz  
 PPMCM 0.44000 ppm/cm  
 HZCM 220.01320 Hz/cm

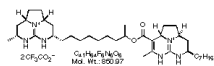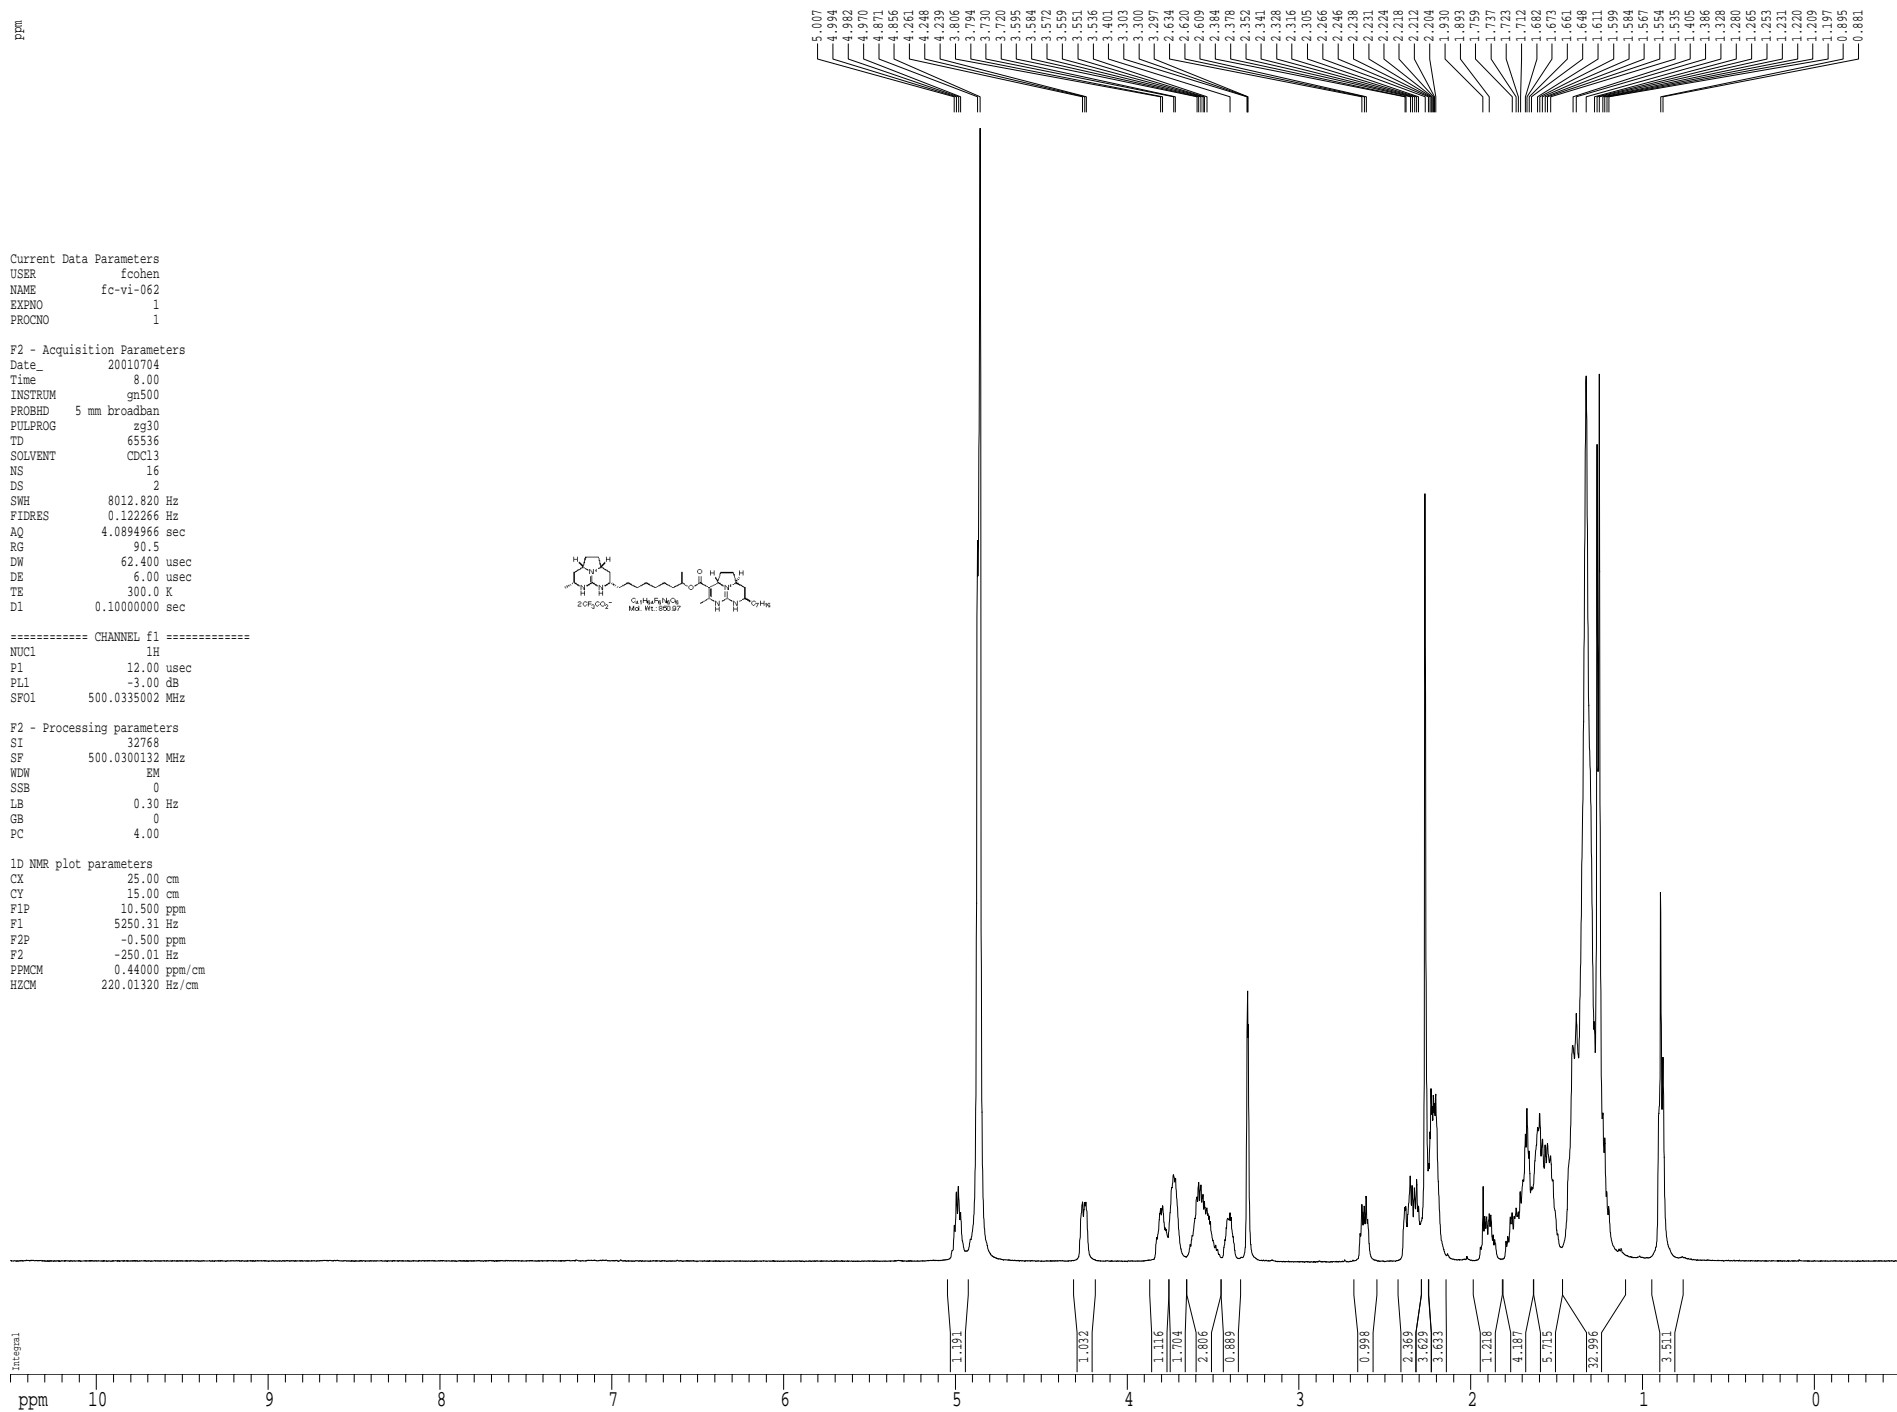

<sup>13</sup>C spectrum with <sup>1</sup>H decoupling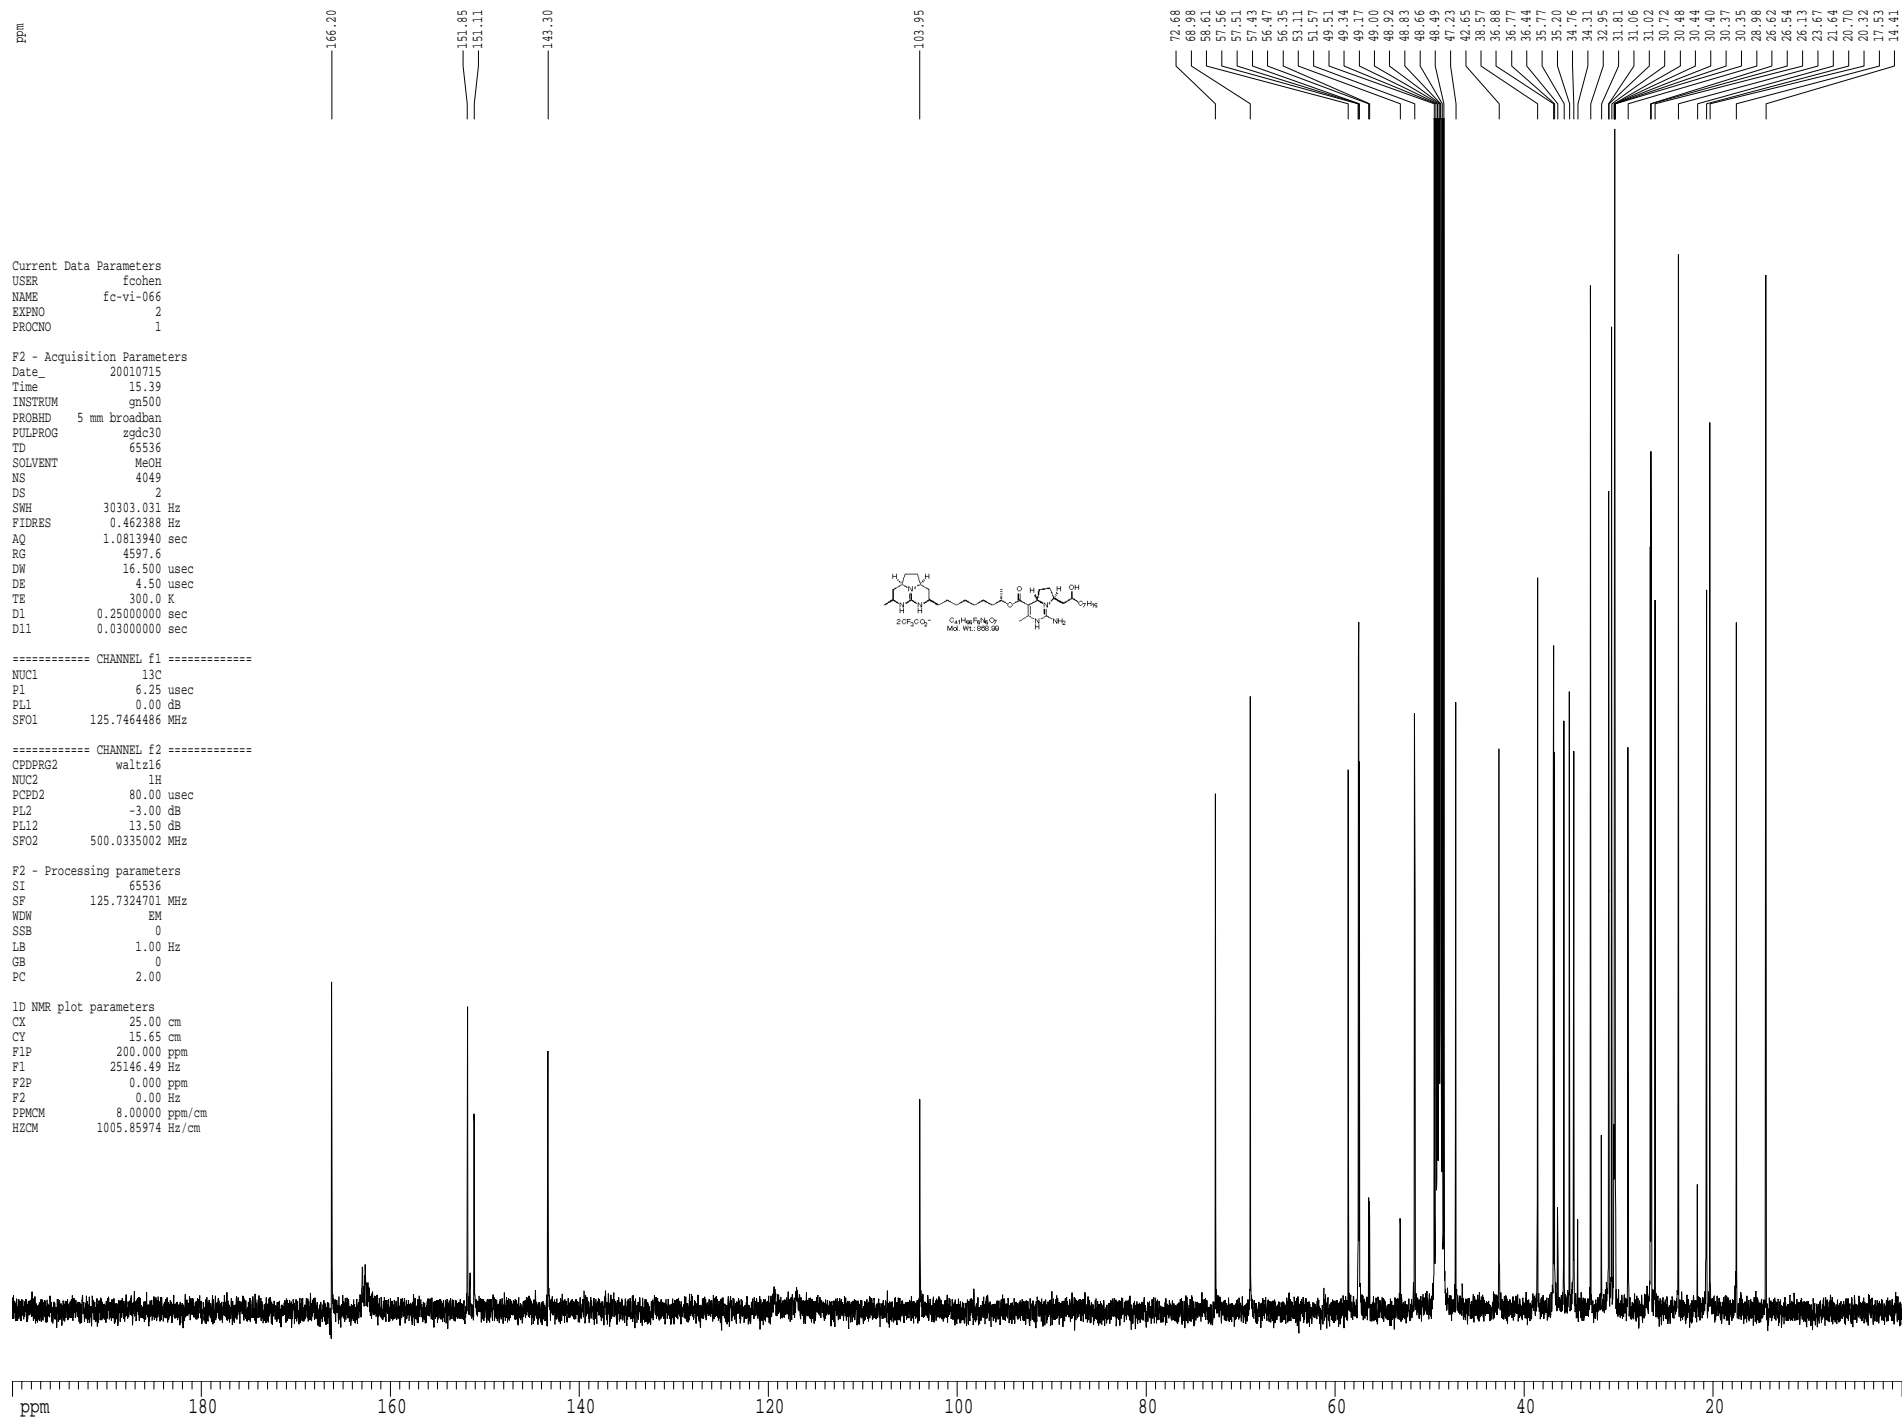

<sup>1</sup>H spectrum

ppm

Current Data Parameters  
USER fcohen  
NAME fc-vi-066  
EXPNO 1  
PROCNO 1

F2 - Acquisition Parameters  
Date\_ 20010715  
Time 14.08  
INSTRUM gn500  
PROBHD 5 mm broadband  
PULPROG zg30  
TD 65536  
SOLVENT CDCl3  
NS 8  
DS 2  
SWH 8012.820 Hz  
FIDRES 0.122266 Hz  
AQ 4.0894966 sec  
RG 64  
DW 62.400 usec  
DE 6.00 usec  
TE 300.0 K  
D1 0.10000000 sec

===== CHANNEL f1 =====  
NUC1 1H  
P1 12.00 usec  
PL1 -3.00 dB  
SFO1 500.0335002 MHz

F2 - Processing parameters  
SI 32768  
SF 500.0300132 MHz  
WDW EM  
SSB 0  
LB 0.30 Hz  
GB 0  
PC 4.00

1D NMR plot parameters  
CX 25.00 cm  
CY 15.00 cm  
F1P 10.500 ppm  
F1 5250.31 Hz  
F2P -0.500 ppm  
F2 -250.01 Hz  
PPMCM 0.44000 ppm/cm  
HZCM 220.01320 Hz/cm

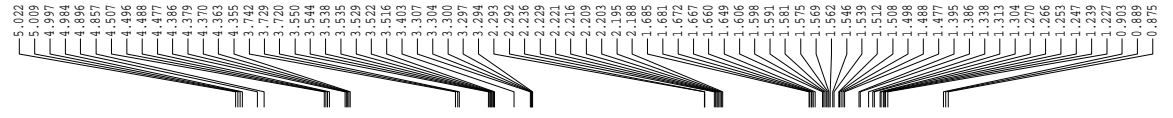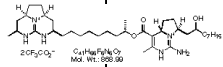

Integral

ppm

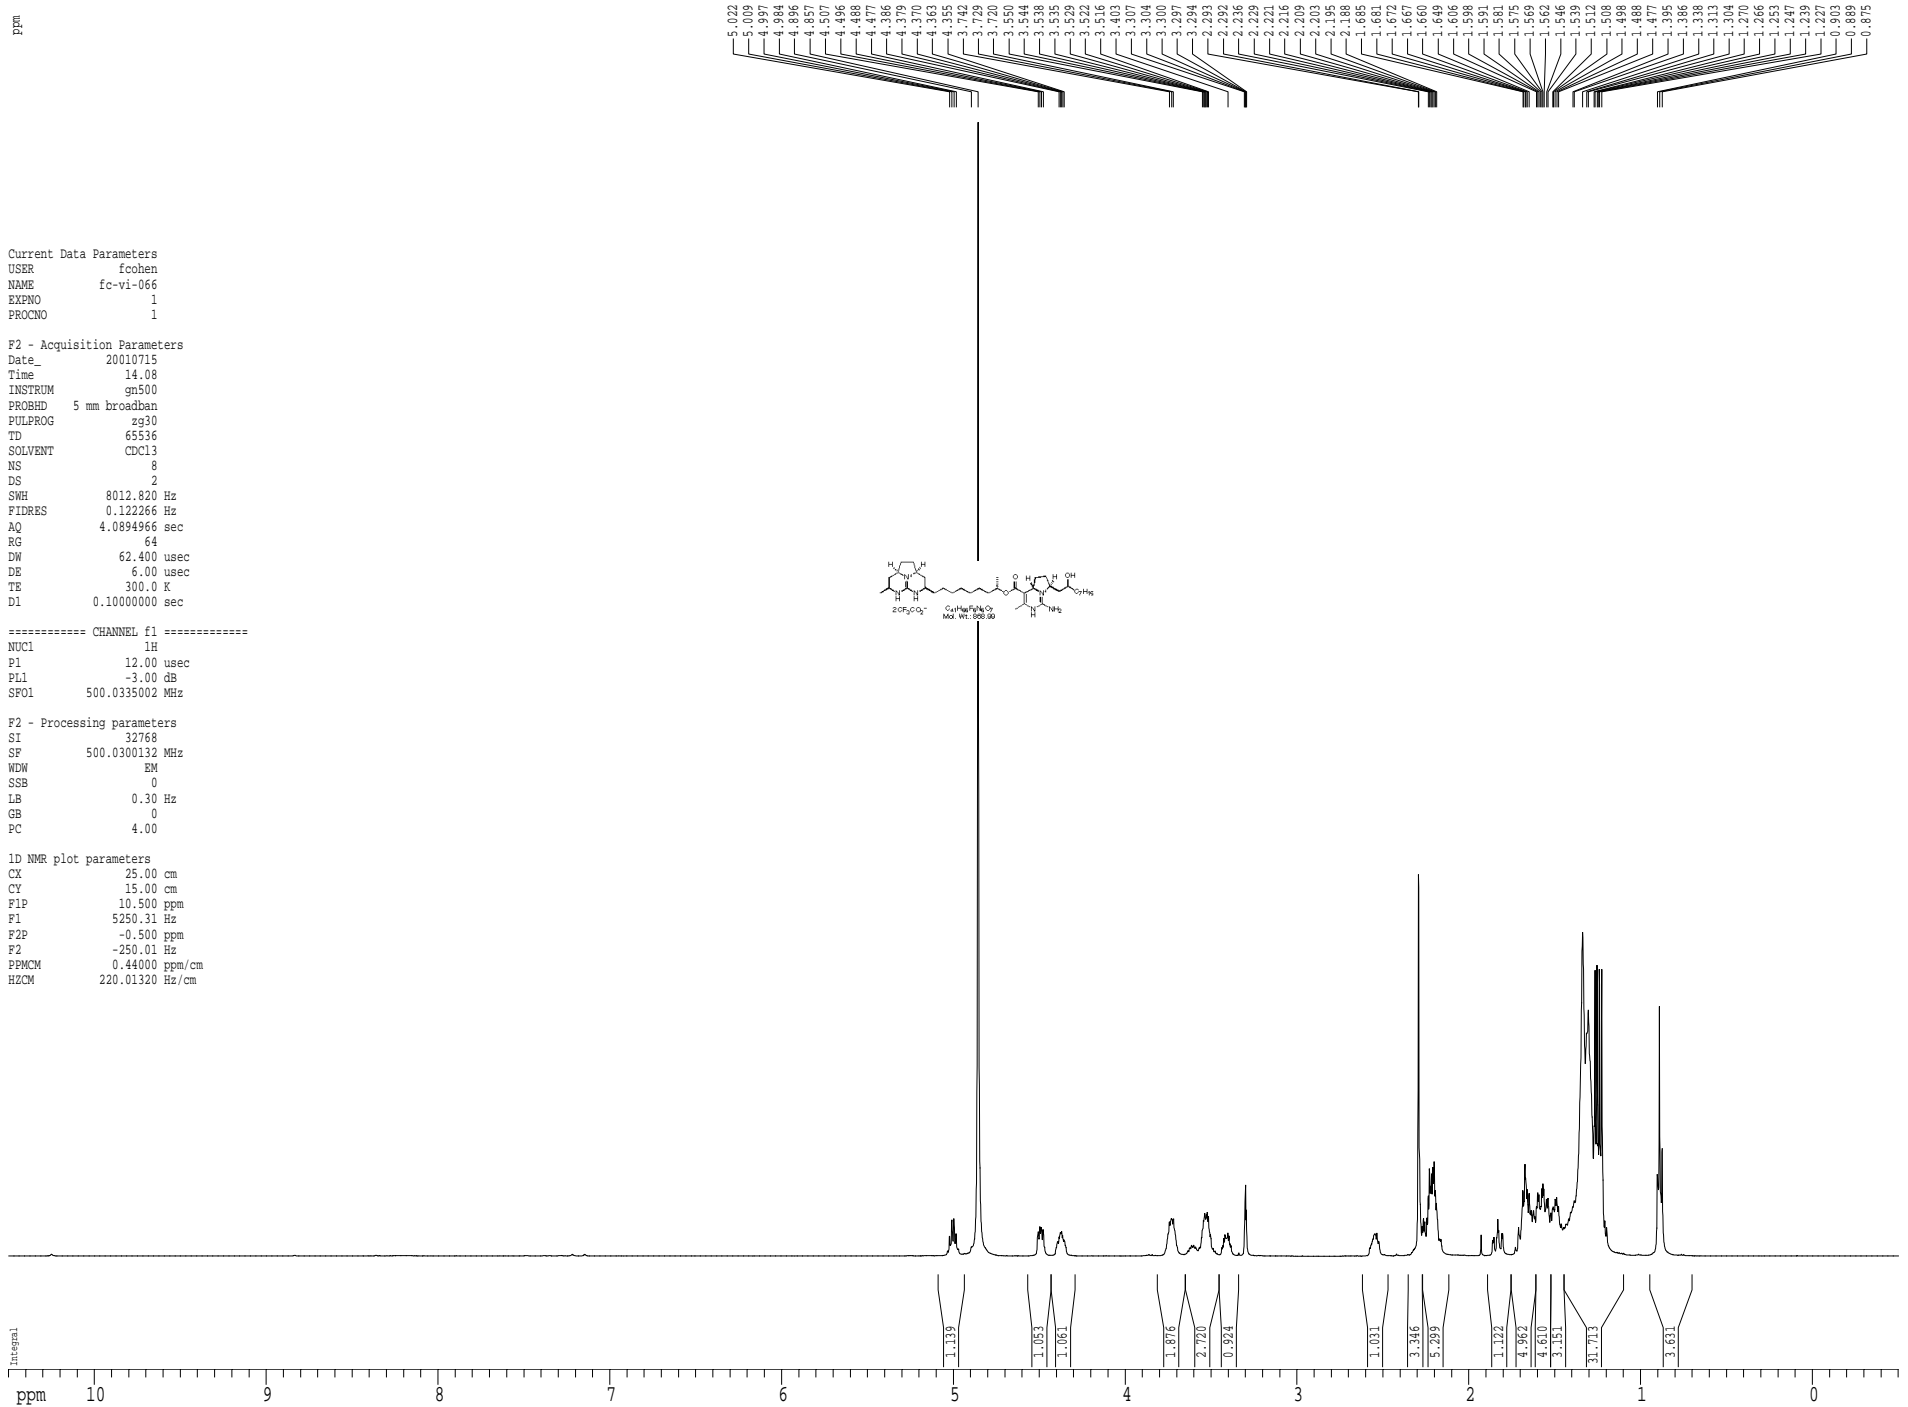

<sup>13</sup>C spectrum with <sup>1</sup>H decoupling

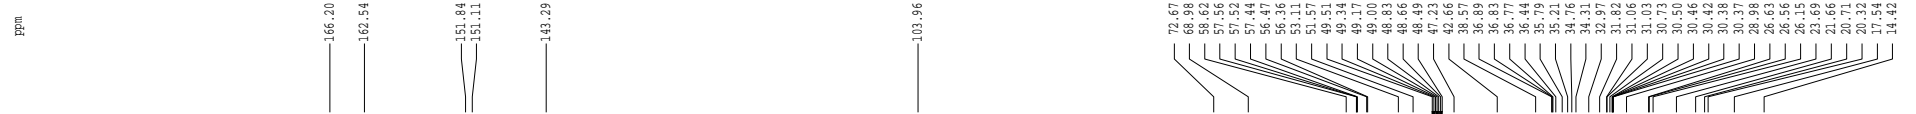

Current Data Parameters  
USER fcohen  
NAME fc-vi-069a  
EXPNO 2  
PROCNO 1

F2 - Acquisition Parameters  
Date\_ 20010718  
Time 21.38  
INSTRUM gn500  
PROBHD 5 mm broadband  
PULPROG zgdc30  
TD 65536  
SOLVENT MeOH  
NS 3397  
DS 2  
SWH 30303.031 Hz  
FIDRES 0.462388 Hz  
AQ 1.0813940 sec  
RG 2298.8  
DW 16.500 usec  
DE 4.50 usec  
TE 300.0 K  
D1 0.25000000 sec  
D11 0.03000000 sec

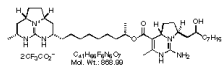

==== CHANNEL f1 =====  
NUC1 13C  
P1 6.25 usec  
PL1 0.00 dB  
SFO1 125.7464486 MHz

==== CHANNEL f2 =====  
CPDPRG2 waltz16  
NUC2 1H  
PCPD2 80.00 usec  
PL2 -3.00 dB  
PL12 13.50 dB  
SFO2 500.0335002 MHz

F2 - Processing parameters  
SI 65536  
SF 125.7324687 MHz  
WDM EM  
SSB 0  
LB 1.00 Hz  
GB 0  
PC 2.00

1D NMR plot parameters  
CX 25.00 cm  
CY 15.65 cm  
FIDP 200.000 ppm  
F1 25146.49 Hz  
F2P 0.000 ppm  
F2 0.00 Hz  
PPMCM 8.00000 ppm/cm  
HZCM 1005.85974 Hz/cm

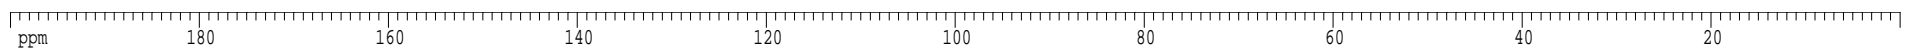

ppm

Current Data Parameters  
 USER fcohen  
 NAME fc-vi-069a  
 EXPNO 1  
 PROCNO 1

F2 - Acquisition Parameters  
 Date\_ 20010718  
 Time 7.49  
 INSTRUM gn500  
 PROBHD 5 mm broadband  
 PULPROG zg30  
 TD 65536  
 SOLVENT MeOH  
 NS 64  
 DS 2  
 SWH 8012.820 Hz  
 FIDRES 0.122266 Hz  
 AQ 4.0894966 sec  
 RG 181  
 DW 62.400 usec  
 DE 6.000 usec  
 TE 300.0 K  
 D1 0.10000000 sec

===== CHANNEL f1 =====  
 NUC1 1H  
 P1 12.00 usec  
 PL1 -3.00 dB  
 SFO1 500.0335002 MHz

F2 - Processing parameters  
 SI 32768  
 SF 500.0300134 MHz  
 WDW EM  
 SSB 0  
 LB 0.30 Hz  
 GB 0  
 PC 4.00

1D NMR plot parameters  
 CX 25.00 cm  
 CY 15.00 cm  
 F1P 10.500 ppm  
 F1 5250.31 Hz  
 F2P -0.500 ppm  
 F2 -250.01 Hz  
 PPMCM 0.44000 ppm/cm  
 HZCM 220.01320 Hz/cm

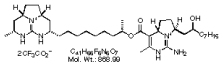

5.026  
5.013  
5.000  
4.988  
4.917  
4.877  
4.515  
4.504  
4.497  
4.484  
4.386  
4.379  
4.371  
4.364  
4.355  
3.745  
3.733  
3.722  
3.537  
3.530  
3.524  
3.517  
3.513  
3.495  
3.307  
3.303  
3.300  
3.297  
3.294  
2.537  
2.290  
2.288  
2.278  
2.271  
2.269  
2.243  
2.234  
2.227  
2.220  
2.216  
2.208  
2.193  
2.187  
1.928  
1.688  
1.686  
1.682  
1.672  
1.664  
1.652  
1.601  
1.594  
1.587  
1.570  
1.564  
1.558  
1.542  
1.512  
1.498  
1.490  
1.479  
1.392  
1.340  
1.306  
1.272  
1.267  
1.260  
1.258  
1.238  
1.230  
1.228  
0.995  
0.892  
0.877

Integral

ppm

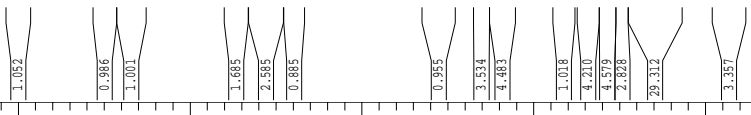

<sup>13</sup>C spectrum with <sup>1</sup>H decoupling

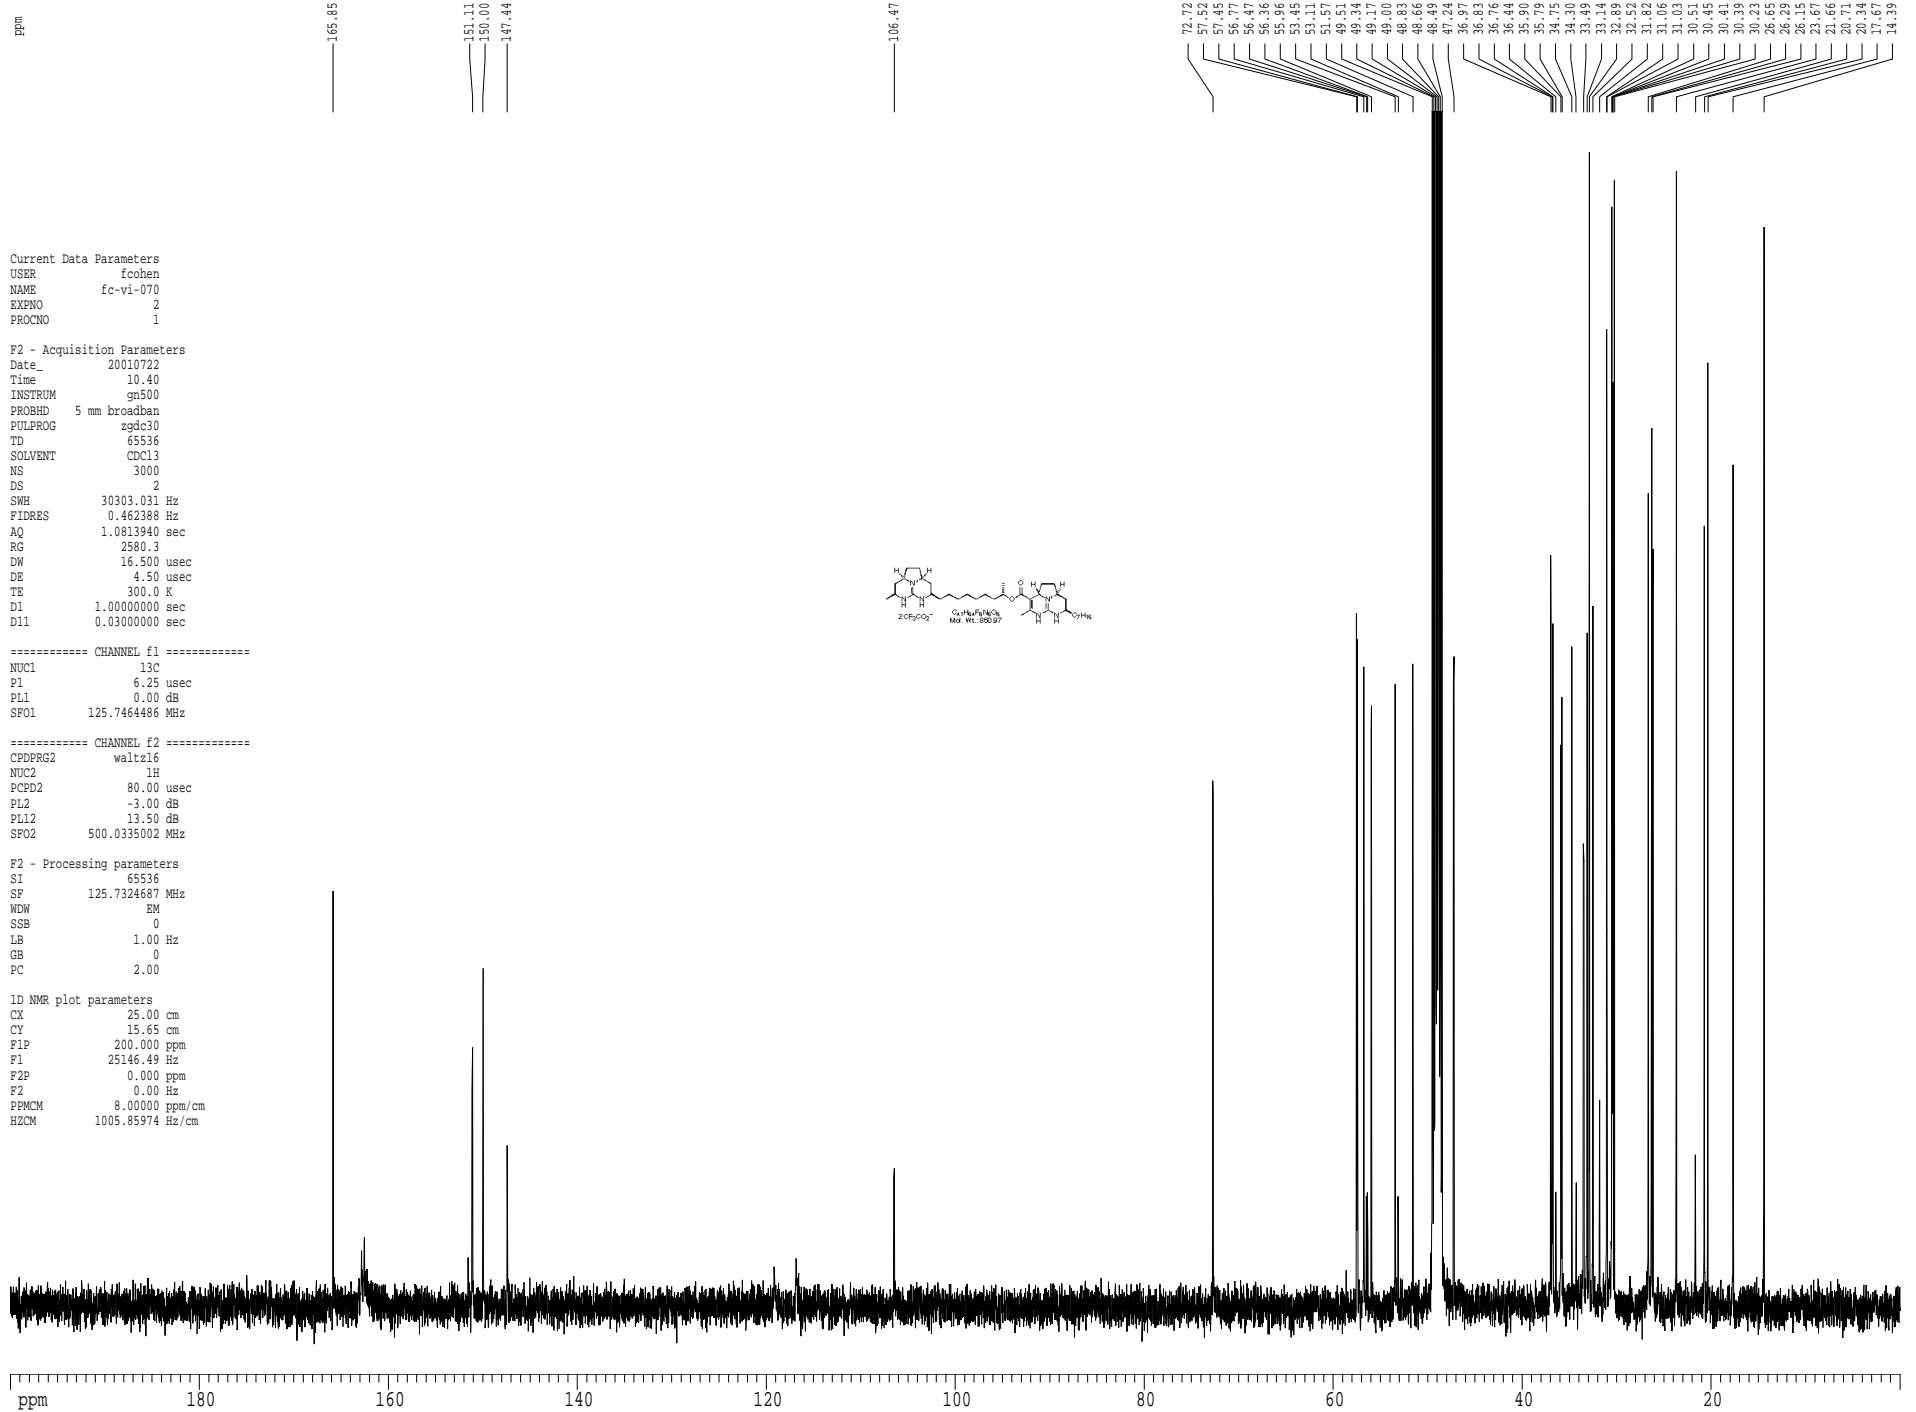

## 1H spectrum

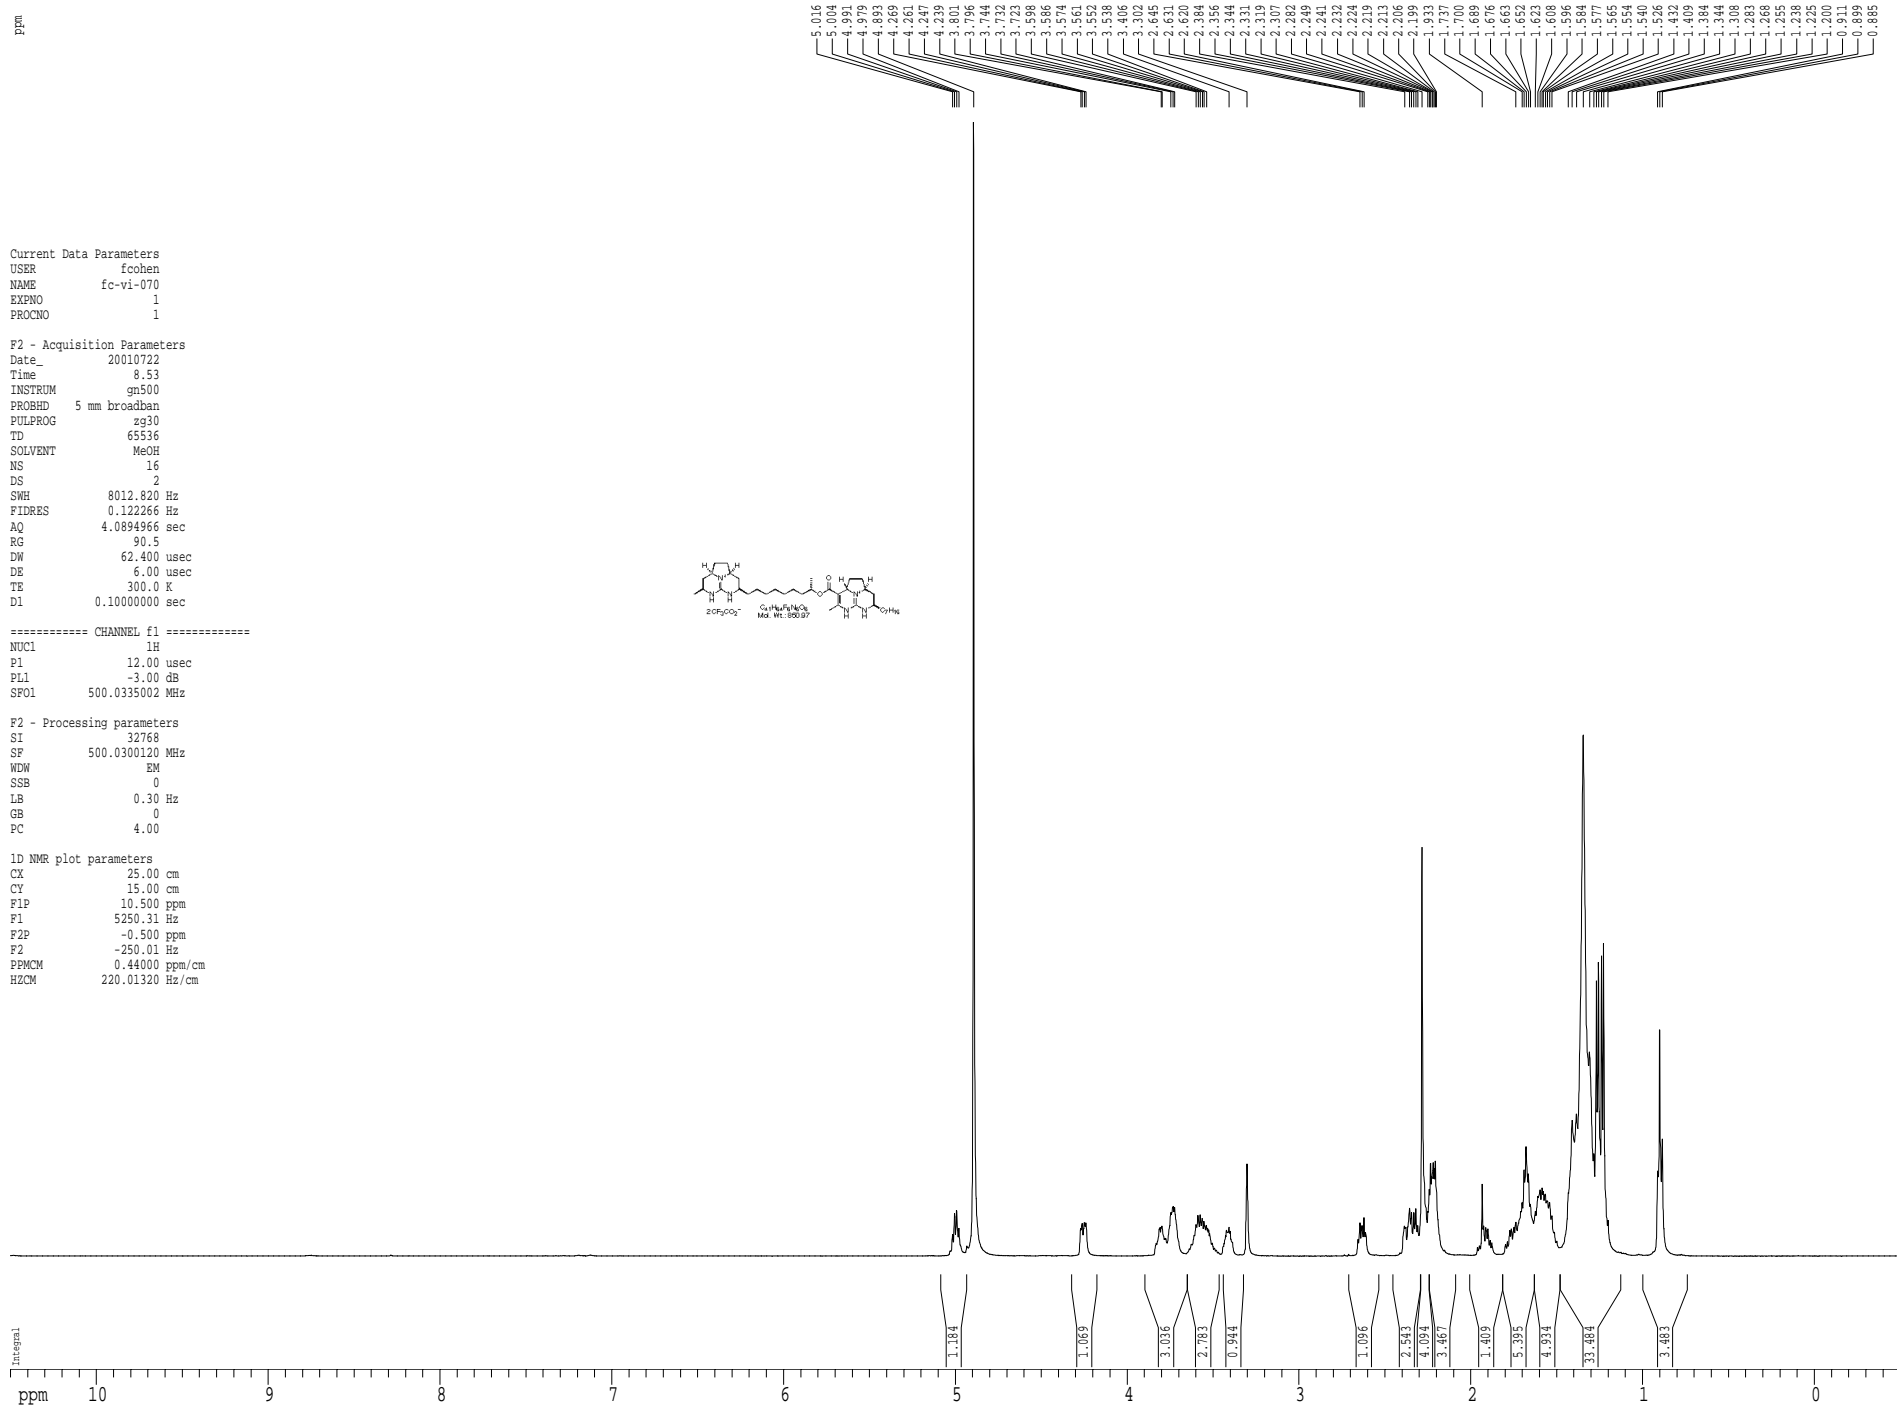

<sup>13</sup>C spectrum with <sup>1</sup>H decoupling

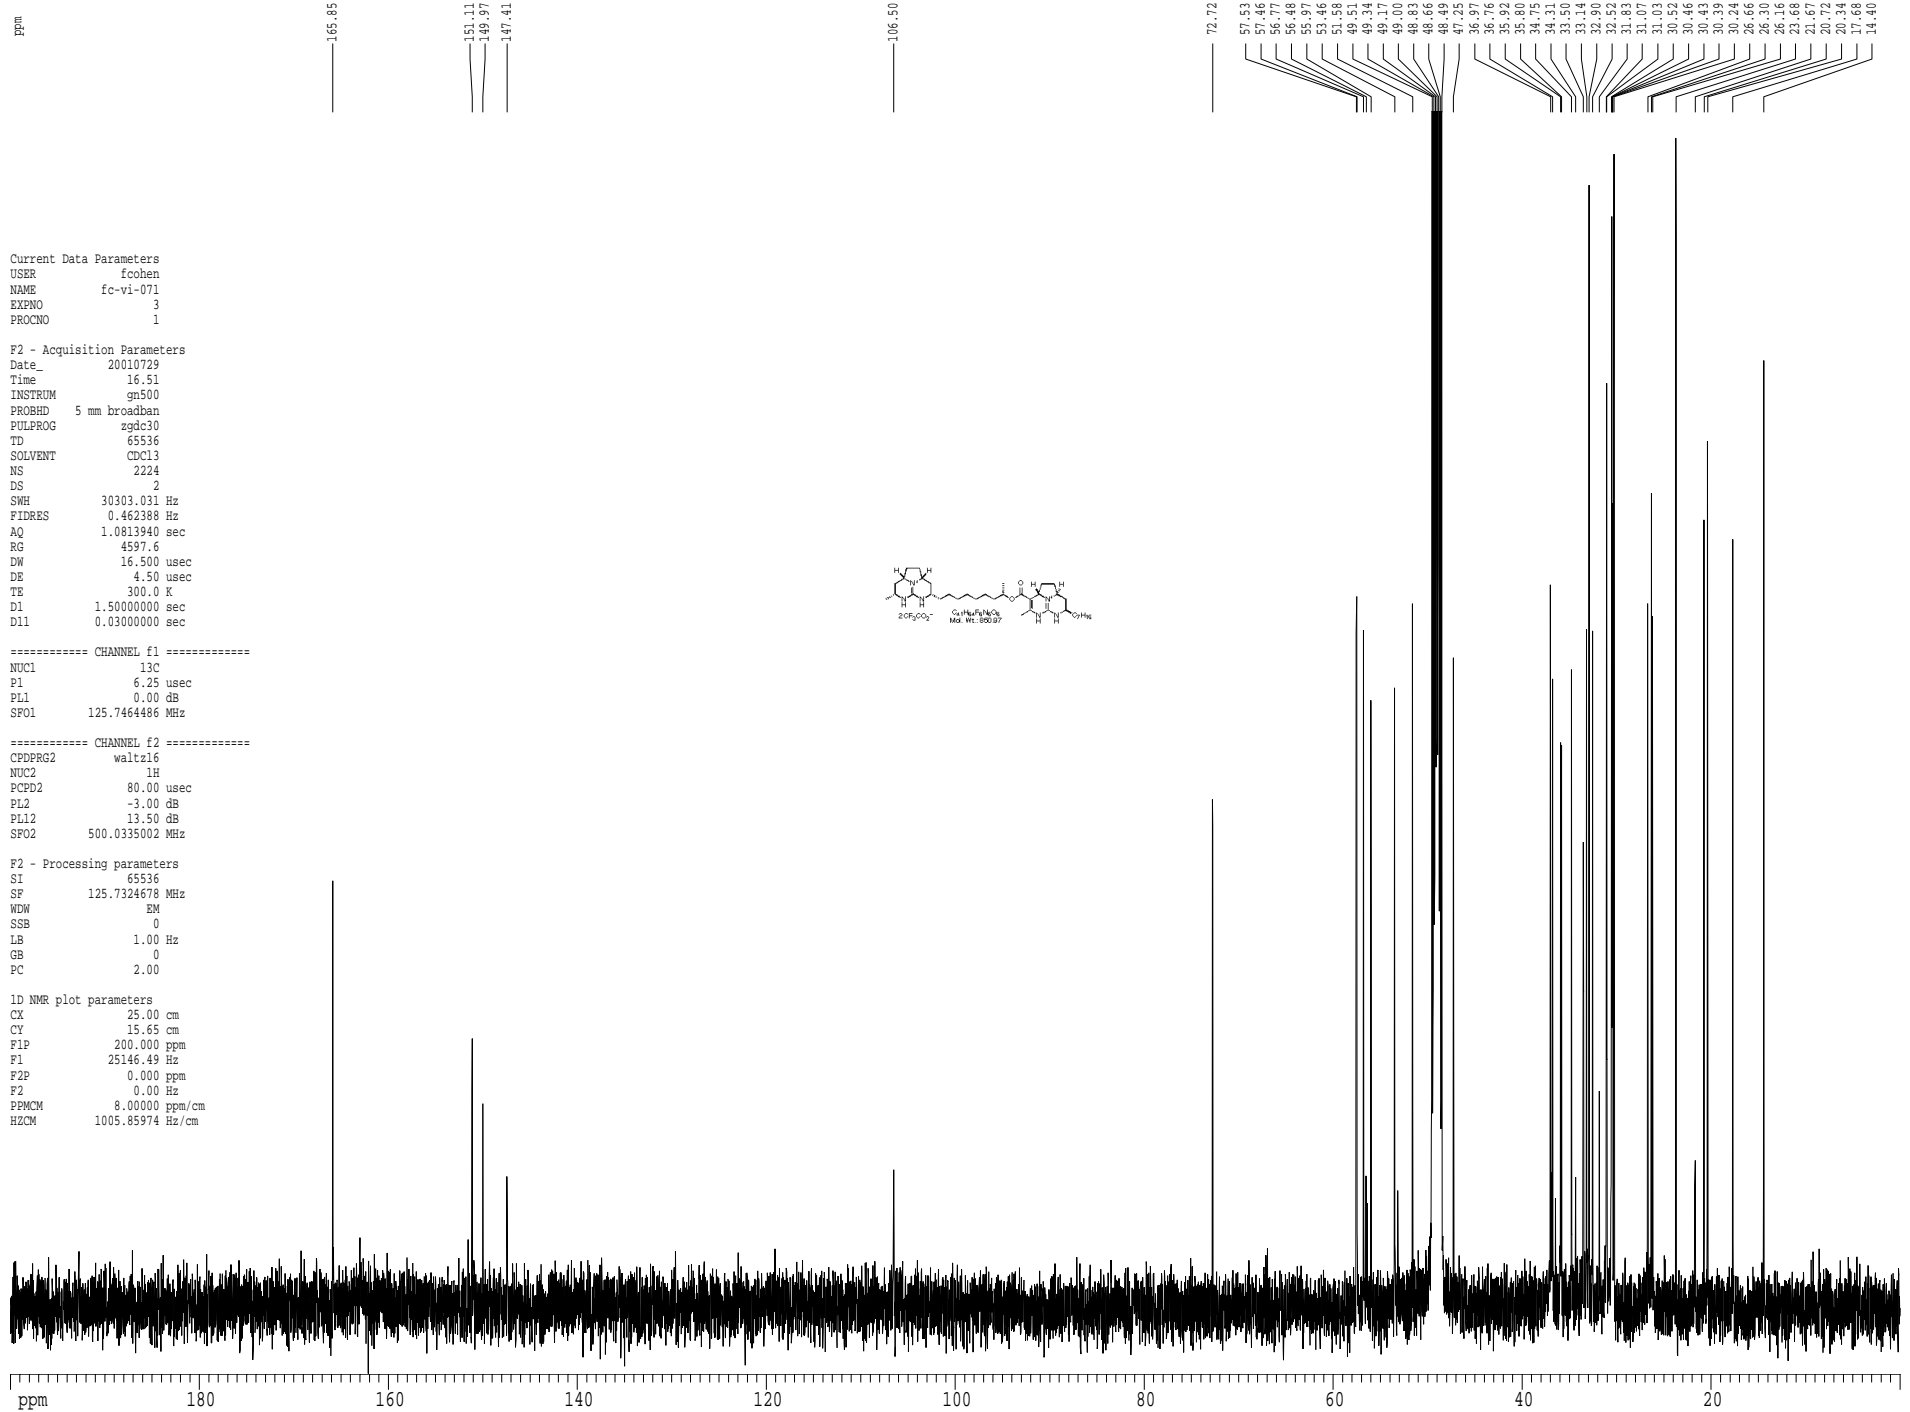

Current Data Parameters  
USER fcohen  
NAME fc-vi-071  
EXPNO 3  
PROCNO 1

F2 - Acquisition Parameters  
Date\_ 20010729  
Time 16.51  
INSTRUM gn500  
PROBHD 5 mm broadband  
PULPROG zgdc30  
TD 65536  
SOLVENT CDCl3  
NS 2224  
DS 2  
SWH 30303.031 Hz  
FIDRES 0.462388 Hz  
AQ 1.0813940 sec  
RG 4597.6  
DW 16.500 usec  
DE 4.50 usec  
TE 300.0 K  
D1 1.50000000 sec  
D11 0.03000000 sec

==== CHANNEL f1 =====  
NUC1 13C  
P1 6.25 usec  
PL1 0.00 dB  
SFO1 125.7464486 MHz

==== CHANNEL f2 =====  
CPDPRG2 waltz16  
NUC2 1H  
PCPD2 80.00 usec  
PL2 -3.00 dB  
PL12 13.50 dB  
SFO2 500.0335002 MHz

F2 - Processing parameters  
SI 65536  
SF 125.7324678 MHz  
WDW EM  
SSB 0  
LB 1.00 Hz  
GB 0  
PC 2.00

1D NMR plot parameters  
CX 25.00 cm  
CY 15.65 cm  
F1P 200.000 ppm  
F1 25146.49 Hz  
F2P 0.000 ppm  
F2 0.00 Hz  
PPMCM 8.00000 ppm/cm  
HZCM 1005.85974 Hz/cm



<sup>1</sup>H spectrum

ppm

Current Data Parameters  
USER fcohen  
NAME fc-vi-071  
EXPNO 2  
PROCNO 1

F2 - Acquisition Parameters  
Date\_ 20010729  
Time 15.13  
INSTRUM gn500  
PROBHD 5 mm broadband  
PULPROG zg30  
TD 65536  
SOLVENT MeOH  
NS 16  
DS 2  
SWH 8012.820 Hz  
FIDRES 0.122266 Hz  
AQ 4.0894966 sec  
RG 90.5  
DW 62.400 usec  
DE 6.000 usec  
TE 300.0 K  
D1 0.10000000 sec

===== CHANNEL f1 =====  
NUC1 <sup>1</sup>H  
P1 12.00 usec  
PL1 -3.00 dB  
SFO1 500.0335002 MHz

F2 - Processing parameters  
SI 32768  
SF 500.0300125 MHz  
WDW EM  
SSB 0  
LB 0.30 Hz  
GB 0  
PC 4.00

1D NMR plot parameters  
CX 25.00 cm  
CY 15.00 cm  
F1P 10.500 ppm  
F1 5250.31 Hz  
F2P -0.500 ppm  
F2 -250.01 Hz  
PPMCM 0.44000 ppm/cm  
HZCM 220.01320 Hz/cm

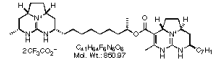

5.016  
5.004  
4.991  
4.977  
4.963  
4.949  
4.935  
4.921  
4.907  
4.893  
4.879  
4.865  
4.851  
4.837  
4.823  
4.809  
4.795  
4.781  
4.767  
4.753  
4.739  
4.725  
4.711  
4.697  
4.683  
4.669  
4.655  
4.641  
4.627  
4.613  
4.599  
4.585  
4.571  
4.557  
4.543  
4.529  
4.515  
4.501  
4.487  
4.473  
4.459  
4.445  
4.431  
4.417  
4.403  
4.389  
4.375  
4.361  
4.347  
4.333  
4.319  
4.305  
4.291  
4.277  
4.263  
4.249  
4.235  
4.221  
4.207  
4.193  
4.179  
4.165  
4.151  
4.137  
4.123  
4.109  
4.095  
4.081  
4.067  
4.053  
4.039  
4.025  
4.011  
4.000  
3.986  
3.972  
3.958  
3.944  
3.930  
3.916  
3.902  
3.888  
3.874  
3.860  
3.846  
3.832  
3.818  
3.804  
3.790  
3.776  
3.762  
3.748  
3.734  
3.720  
3.706  
3.692  
3.678  
3.664  
3.650  
3.636  
3.622  
3.608  
3.594  
3.580  
3.566  
3.552  
3.538  
3.524  
3.510  
3.496  
3.482  
3.468  
3.454  
3.440  
3.426  
3.412  
3.398  
3.384  
3.370  
3.356  
3.342  
3.328  
3.314  
3.300  
3.286  
3.272  
3.258  
3.244  
3.230  
3.216  
3.202  
3.188  
3.174  
3.160  
3.146  
3.132  
3.118  
3.104  
3.090  
3.076  
3.062  
3.048  
3.034  
3.020  
3.006  
2.992  
2.978  
2.964  
2.950  
2.936  
2.922  
2.908  
2.894  
2.880  
2.866  
2.852  
2.838  
2.824  
2.810  
2.796  
2.782  
2.768  
2.754  
2.740  
2.726  
2.712  
2.698  
2.684  
2.670  
2.656  
2.642  
2.628  
2.614  
2.600  
2.586  
2.572  
2.558  
2.544  
2.530  
2.516  
2.502  
2.488  
2.474  
2.460  
2.446  
2.432  
2.418  
2.404  
2.390  
2.376  
2.362  
2.348  
2.334  
2.320  
2.306  
2.292  
2.278  
2.264  
2.250  
2.236  
2.222  
2.208  
2.194  
2.180  
2.166  
2.152  
2.138  
2.124  
2.110  
2.096  
2.082  
2.068  
2.054  
2.040  
2.026  
2.012  
2.000  
1.986  
1.972  
1.958  
1.944  
1.930  
1.916  
1.902  
1.888  
1.874  
1.860  
1.846  
1.832  
1.818  
1.804  
1.790  
1.776  
1.762  
1.748  
1.734  
1.720  
1.706  
1.692  
1.678  
1.664  
1.650  
1.636  
1.622  
1.608  
1.594  
1.580  
1.566  
1.552  
1.538  
1.524  
1.510  
1.496  
1.482  
1.468  
1.454  
1.440  
1.426  
1.412  
1.398  
1.384  
1.370  
1.356  
1.342  
1.328  
1.314  
1.300  
1.286  
1.272  
1.258  
1.244  
1.230  
1.216  
1.202  
1.188  
1.174  
1.160  
1.146  
1.132  
1.118  
1.104  
1.090  
1.076  
1.062  
1.048  
1.034  
1.020  
1.006  
0.992  
0.978  
0.964  
0.950  
0.936  
0.922  
0.908  
0.894  
0.880  
0.866  
0.852  
0.838  
0.824  
0.810  
0.796  
0.782  
0.768  
0.754  
0.740  
0.726  
0.712  
0.698  
0.684  
0.670  
0.656  
0.642  
0.628  
0.614  
0.600  
0.586  
0.572  
0.558  
0.544  
0.530  
0.516  
0.502  
0.488  
0.474  
0.460  
0.446  
0.432  
0.418  
0.404  
0.390  
0.376  
0.362  
0.348  
0.334  
0.320  
0.306  
0.292  
0.278  
0.264  
0.250  
0.236  
0.222  
0.208  
0.194  
0.180  
0.166  
0.152  
0.138  
0.124  
0.110  
0.096  
0.082  
0.068  
0.054  
0.040  
0.026  
0.012  
0.000

Integral

ppm

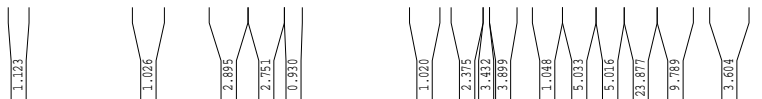

<sup>13</sup>C spectrum with <sup>1</sup>H decoupling

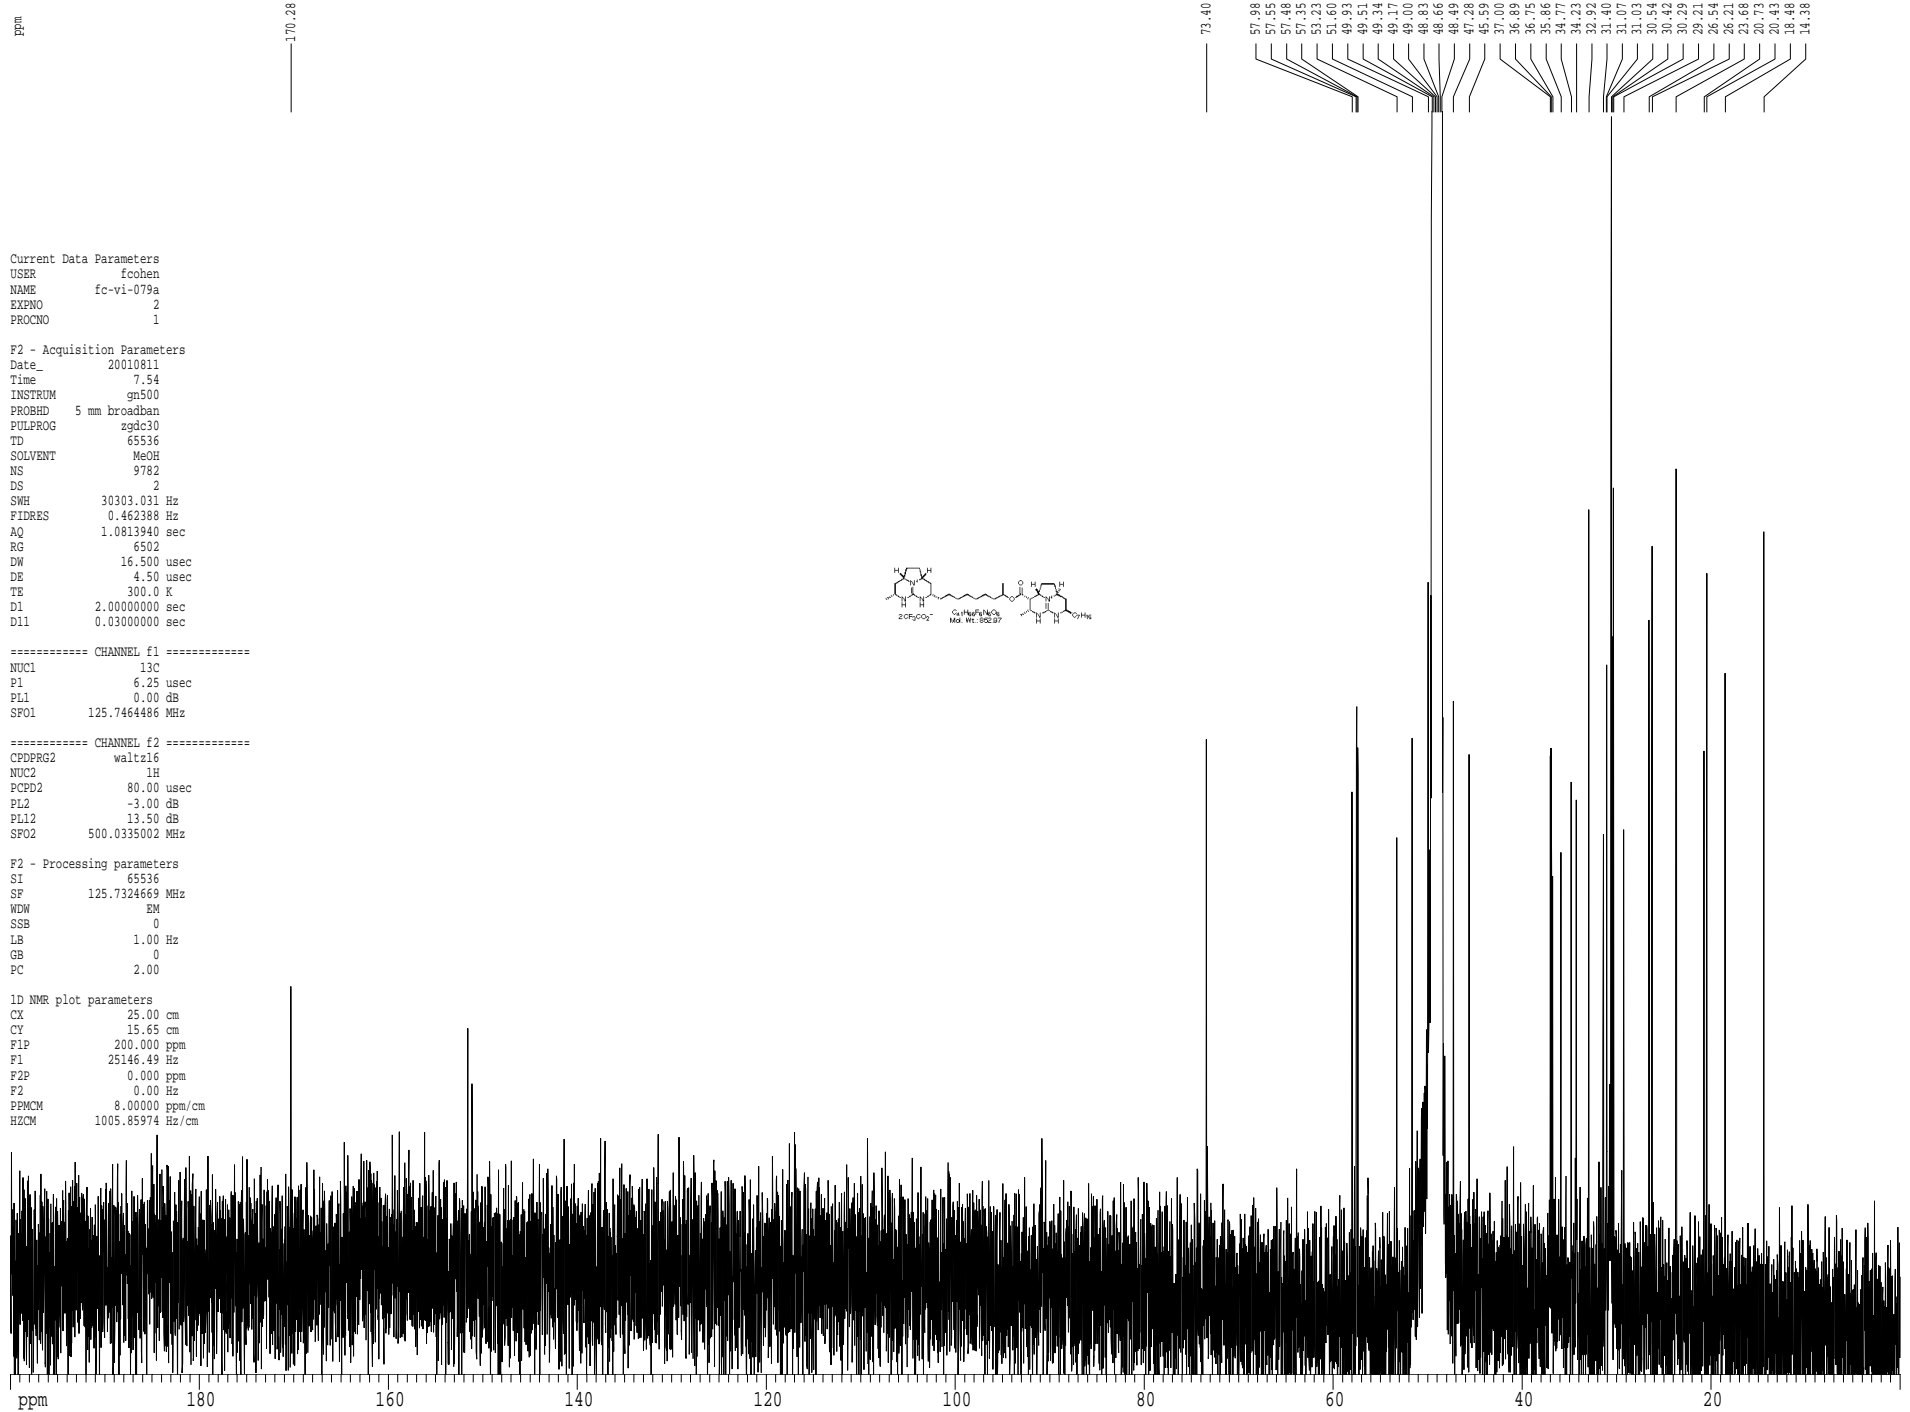

<sup>1</sup>H spectrum

ppm

Current Data Parameters  
 USER fcohen  
 NAME fc-vi-079a  
 EXPNO 1  
 PROCNO 1

F2 - Acquisition Parameters  
 Date\_ 20010810  
 Time 8.36  
 INSTRUM gn500  
 PROBHD 5 mm broadband  
 PULPROG zg30  
 TD 65536  
 SOLVENT MeOH  
 NS 140  
 DS 2  
 SWH 8012.820 Hz  
 FIDRES 0.122266 Hz  
 AQ 4.0894966 sec  
 RG 456.1  
 DW 62.400 usec  
 DE 6.000 usec  
 TE 300.0 K  
 D1 2.00000000 sec

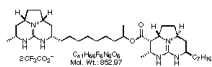

===== CHANNEL f1 =====  
 NUC1 1H  
 P1 12.00 usec  
 PL1 -3.00 dB  
 SF01 500.0335002 MHz

F2 - Processing parameters  
 SI 32768  
 SF 500.0300134 MHz  
 WDW EM  
 SSB 0  
 LB 0.30 Hz  
 GB 0  
 PC 4.00

1D NMR plot parameters  
 CX 25.00 cm  
 CY 15.00 cm  
 F1P 10.500 ppm  
 F1 5250.31 Hz  
 F2P -0.500 ppm  
 F2 -250.01 Hz  
 PPMCM 0.44000 ppm/cm  
 HZCM 220.01320 Hz/cm

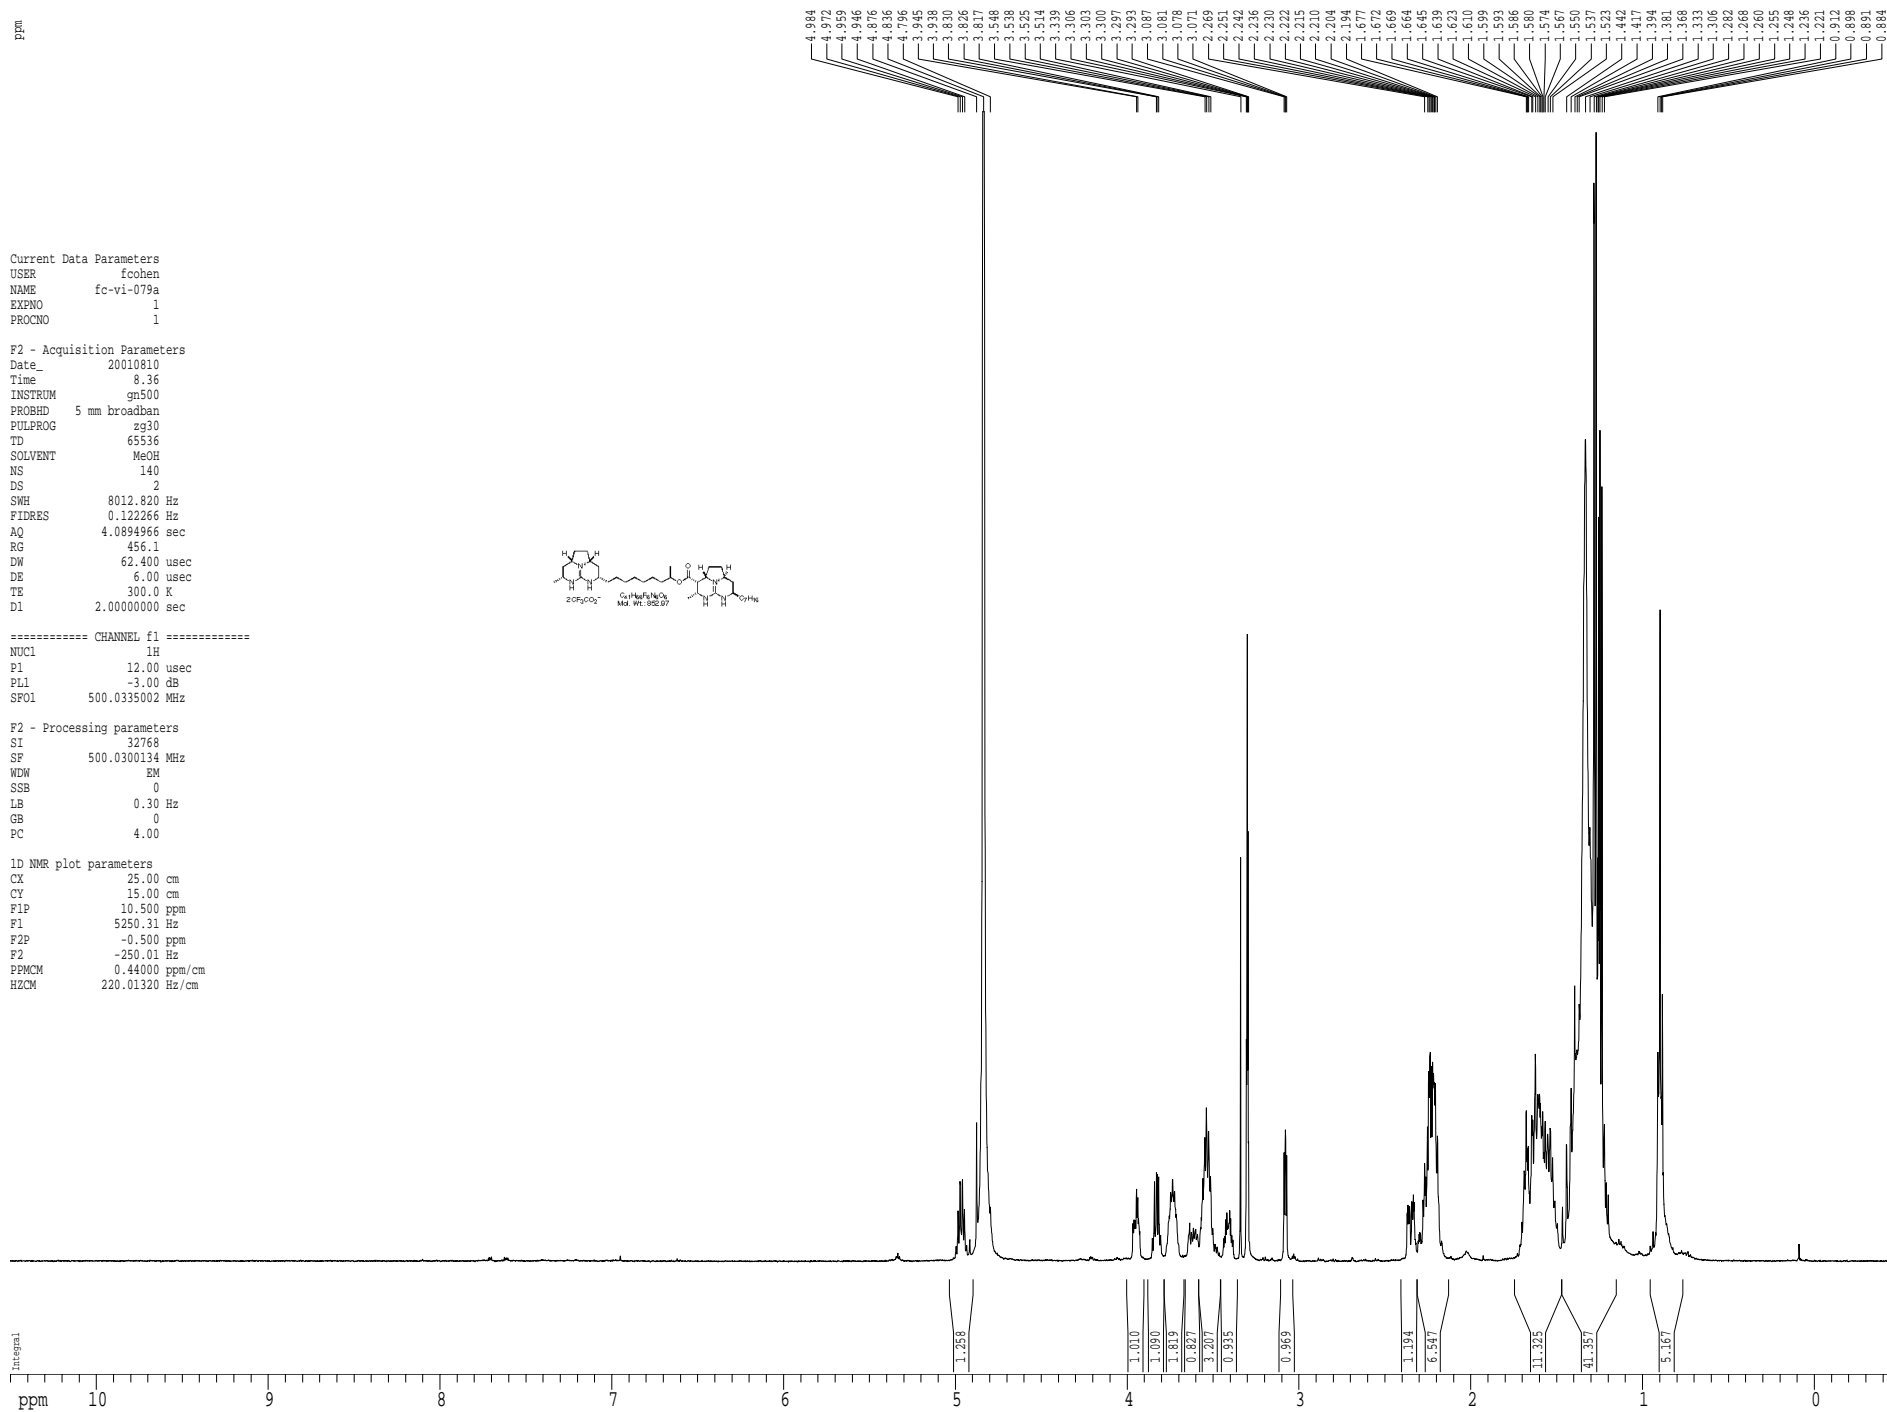

<sup>13</sup>C spectrum with <sup>1</sup>H decoupling

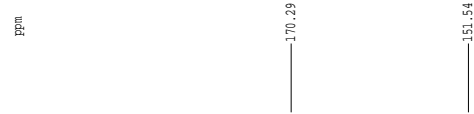

Current Data Parameters  
 USER fcohen  
 NAME fc-vi-081a  
 EXPNO 2  
 PROCNO 1

F2 - Acquisition Parameters  
 Date\_ 20010812  
 Time 7.41  
 INSTRUM gn500  
 PROBHD 5 mm broadband  
 PULPROG zgdc30  
 TD 65536  
 SOLVENT MeOH  
 NS 22000  
 DS 2  
 SWH 30303.031 Hz  
 FIDRES 0.462388 Hz  
 AQ 1.0813940 sec  
 RG 4597.6  
 DW 16.500 usec  
 DE 4.50 usec  
 TE 300.0 K  
 D1 0.25000000 sec  
 D11 0.03000000 sec

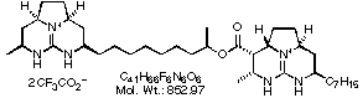

===== CHANNEL f1 =====  
 NUC1 13C  
 P1 6.25 usec  
 PL1 0.00 dB  
 SFO1 125.7464486 MHz

===== CHANNEL f2 =====  
 CPDPRG2 waltz16  
 NUC2 1H  
 PCPD2 80.00 usec  
 PL2 -3.00 dB  
 PL12 13.50 dB  
 SPO2 500.0335002 MHz

F2 - Processing parameters  
 SI 65536  
 SF 125.7324655 MHz  
 WDM EM  
 SSB 0  
 LB 1.00 Hz  
 GB 0  
 PC 2.00

1D NMR plot parameters  
 CX 25.00 cm  
 CY 15.65 cm  
 FIP 200.000 ppm  
 F1 25146.49 Hz  
 F2P 0.000 ppm  
 F2 0.00 Hz  
 PPMCM 8.00000 ppm/cm  
 HZCM 1005.85974 Hz/cm

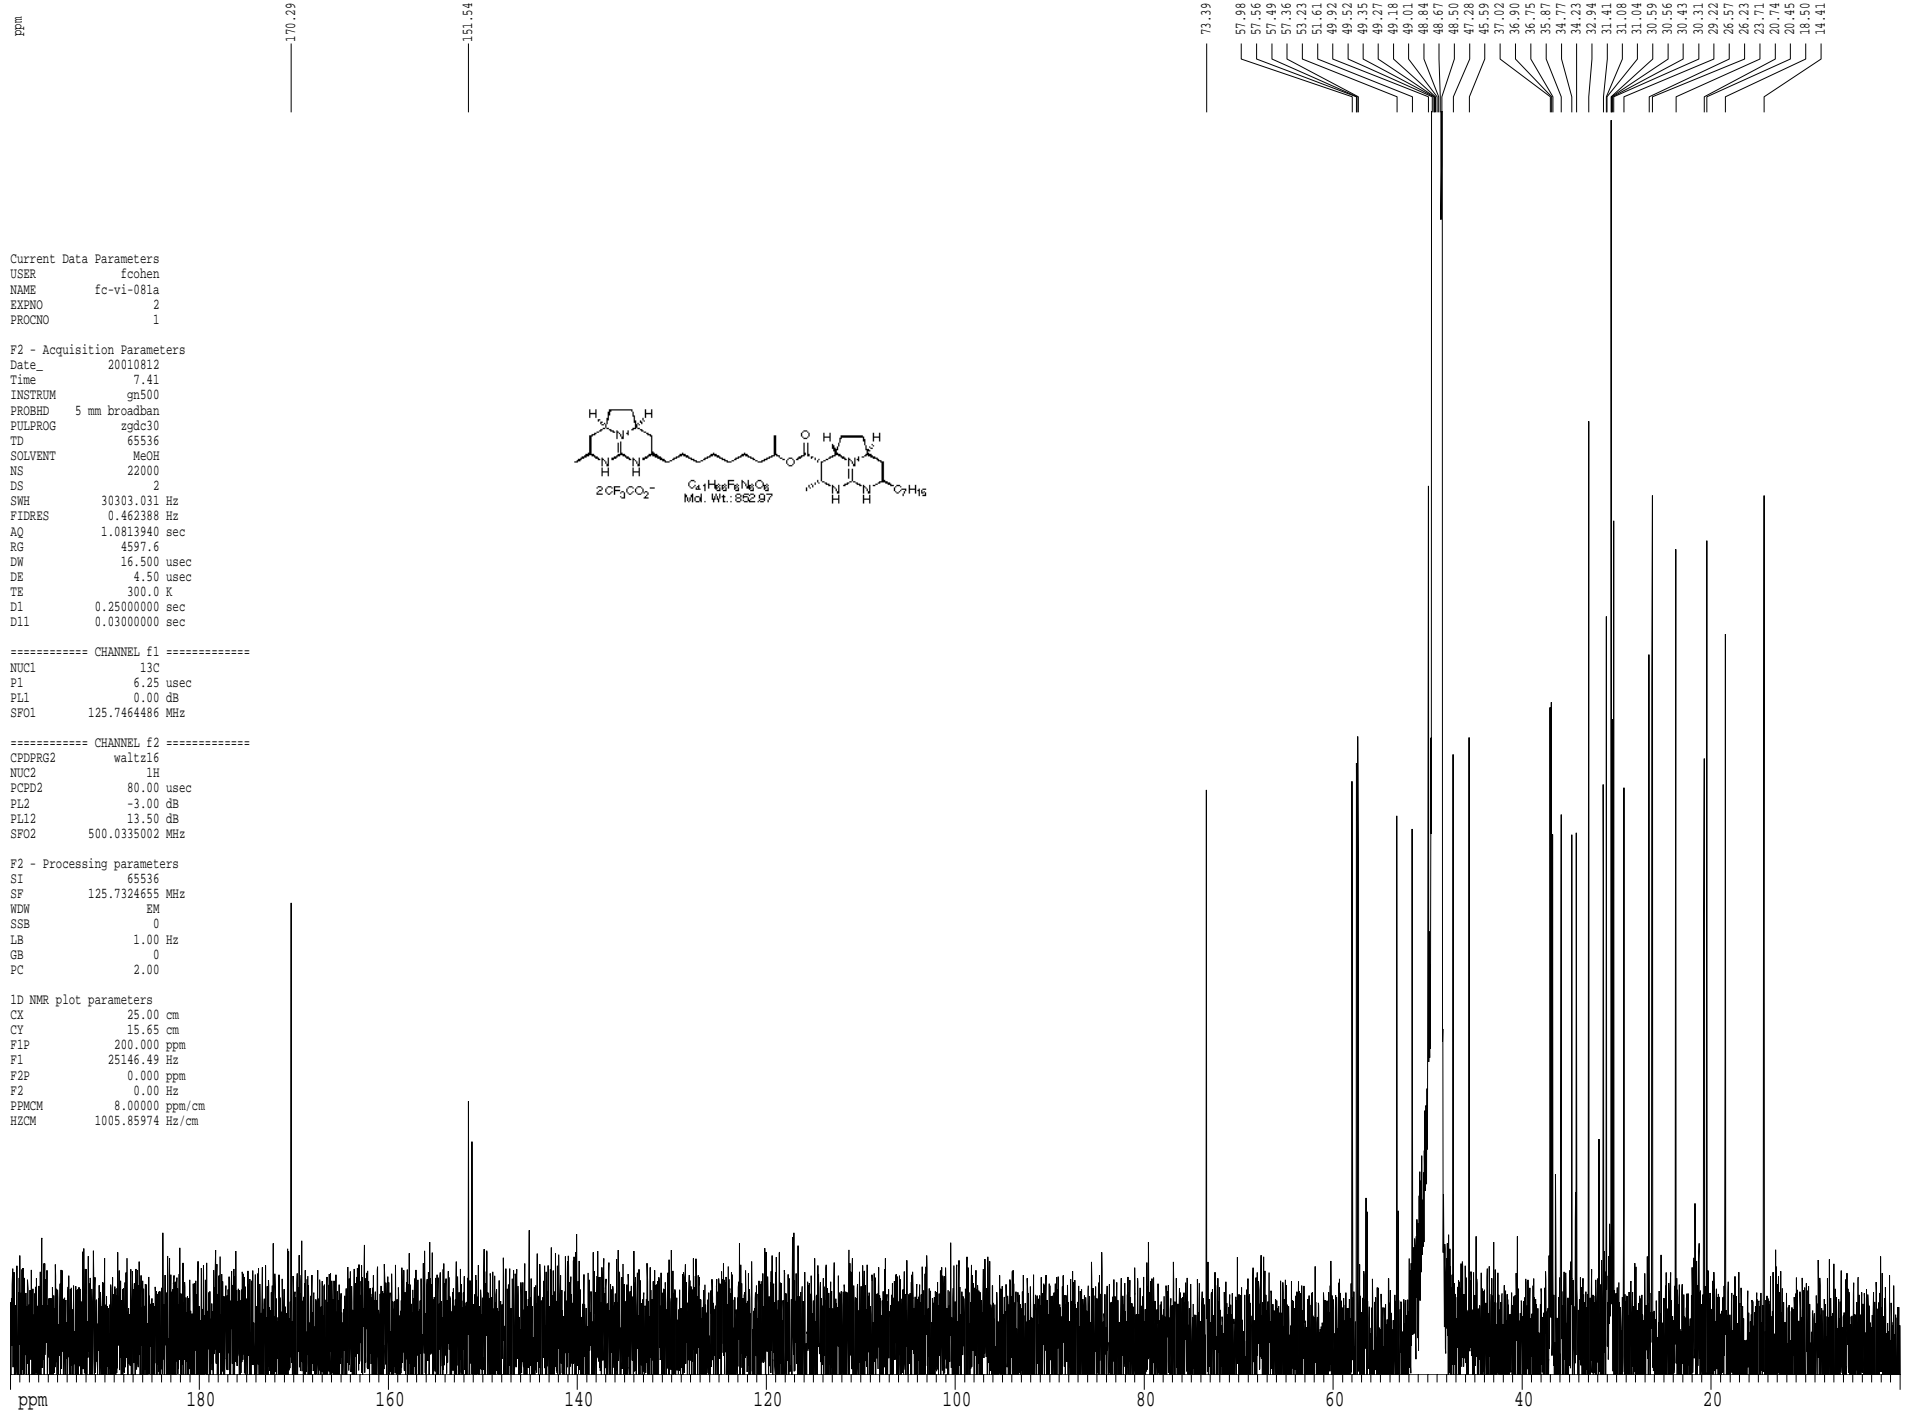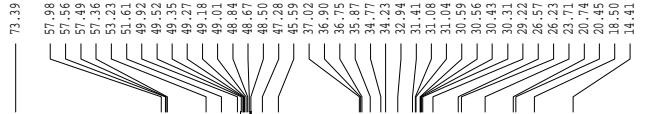

1H spectrum

ppm

Current Data Parameters  
 USER fcohen  
 NAME fc-vi-081a  
 EXPNO 1  
 PROCNO 1

F2 - Acquisition Parameters  
 Date\_ 20010811  
 Time 23.29  
 INSTRUM gn500  
 PROBHD 5 mm broadband  
 PULPROG zg30  
 TD 65536  
 SOLVENT CDCl3  
 NS 128  
 DS 2  
 SWH 8012.820 Hz  
 FIDRES 0.122266 Hz  
 AQ 4.0894966 sec  
 RG 456.1  
 DW 62.400 usec  
 DE 6.00 usec  
 TE 300.0 K  
 D1 1.00000000 sec

===== CHANNEL f1 =====  
 NUC1 1H  
 P1 12.00 usec  
 PL1 -3.00 dB  
 SFO1 500.0335002 MHz

F2 - Processing parameters  
 SI 32768  
 SF 500.0300134 MHz  
 WDW EM  
 SSB 0  
 LB 0.30 Hz  
 GB 0  
 PC 4.00

1D NMR plot parameters  
 CX 25.00 cm  
 CY 15.00 cm  
 F1P 10.500 ppm  
 F1 5250.31 Hz  
 F2P -0.500 ppm  
 F2 -250.01 Hz  
 PPMCM 0.44000 ppm/cm  
 HZCM 220.01320 Hz/cm

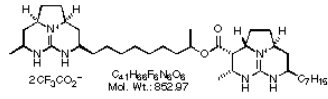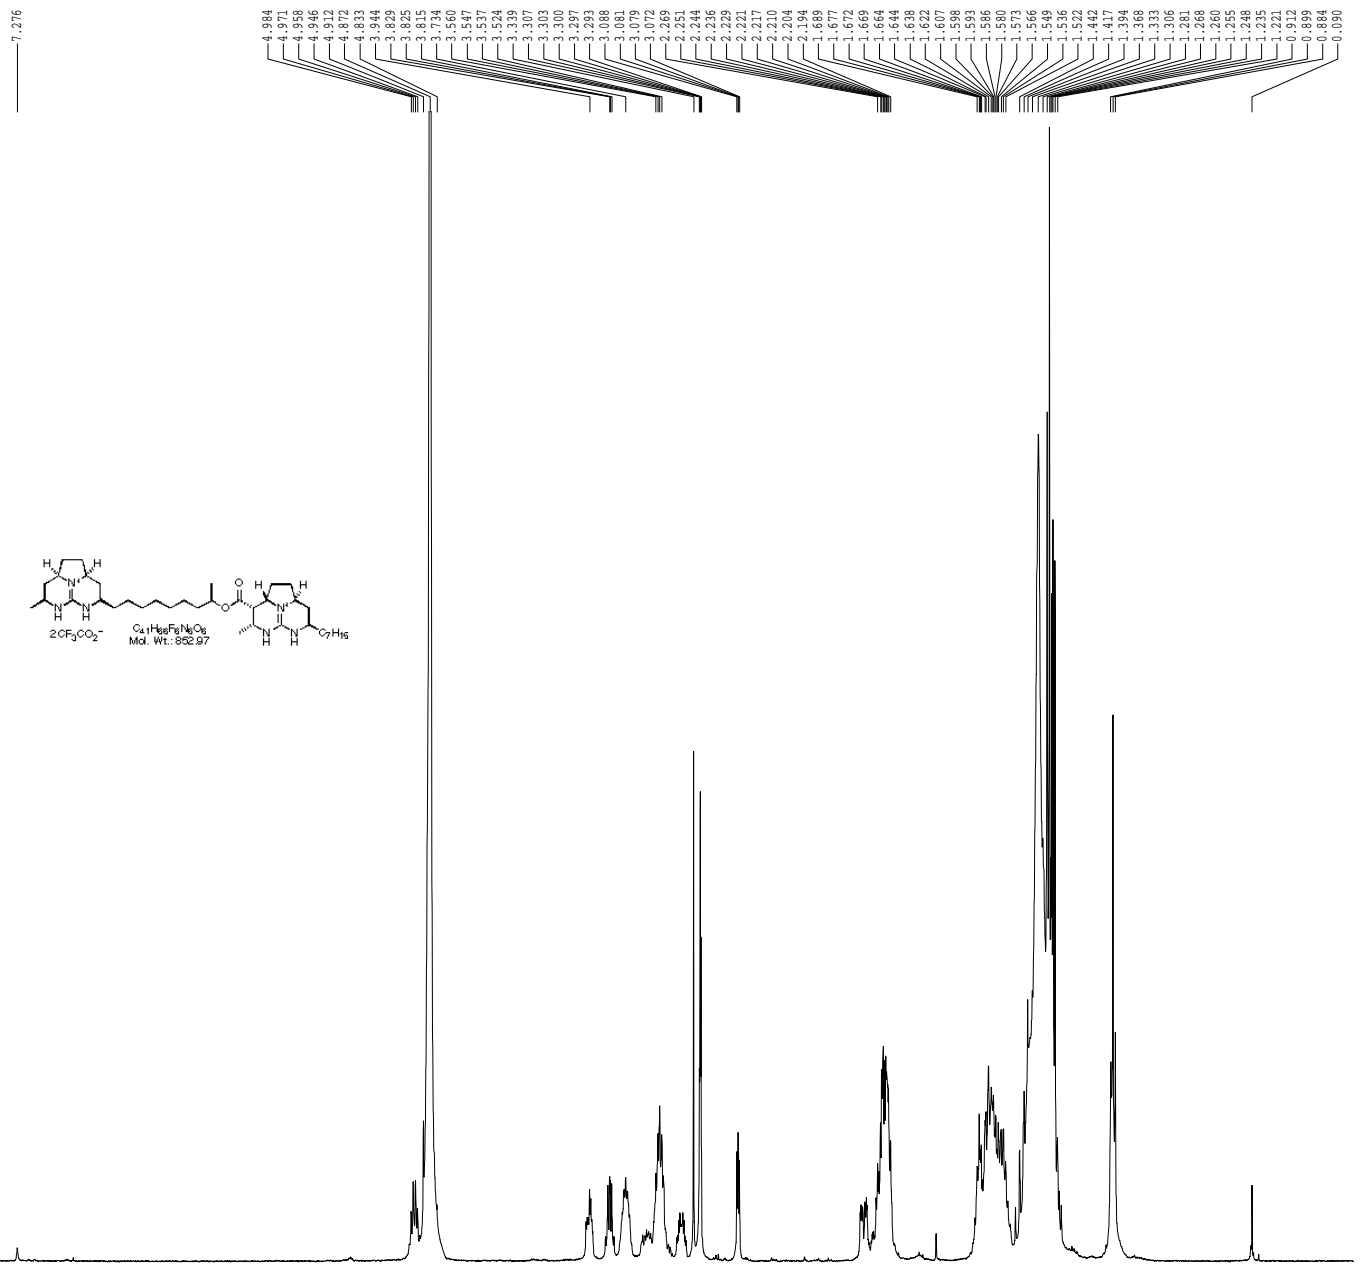

Integral

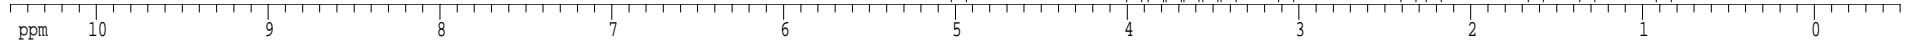

<sup>13</sup>C spectrum with <sup>1</sup>H decoupling

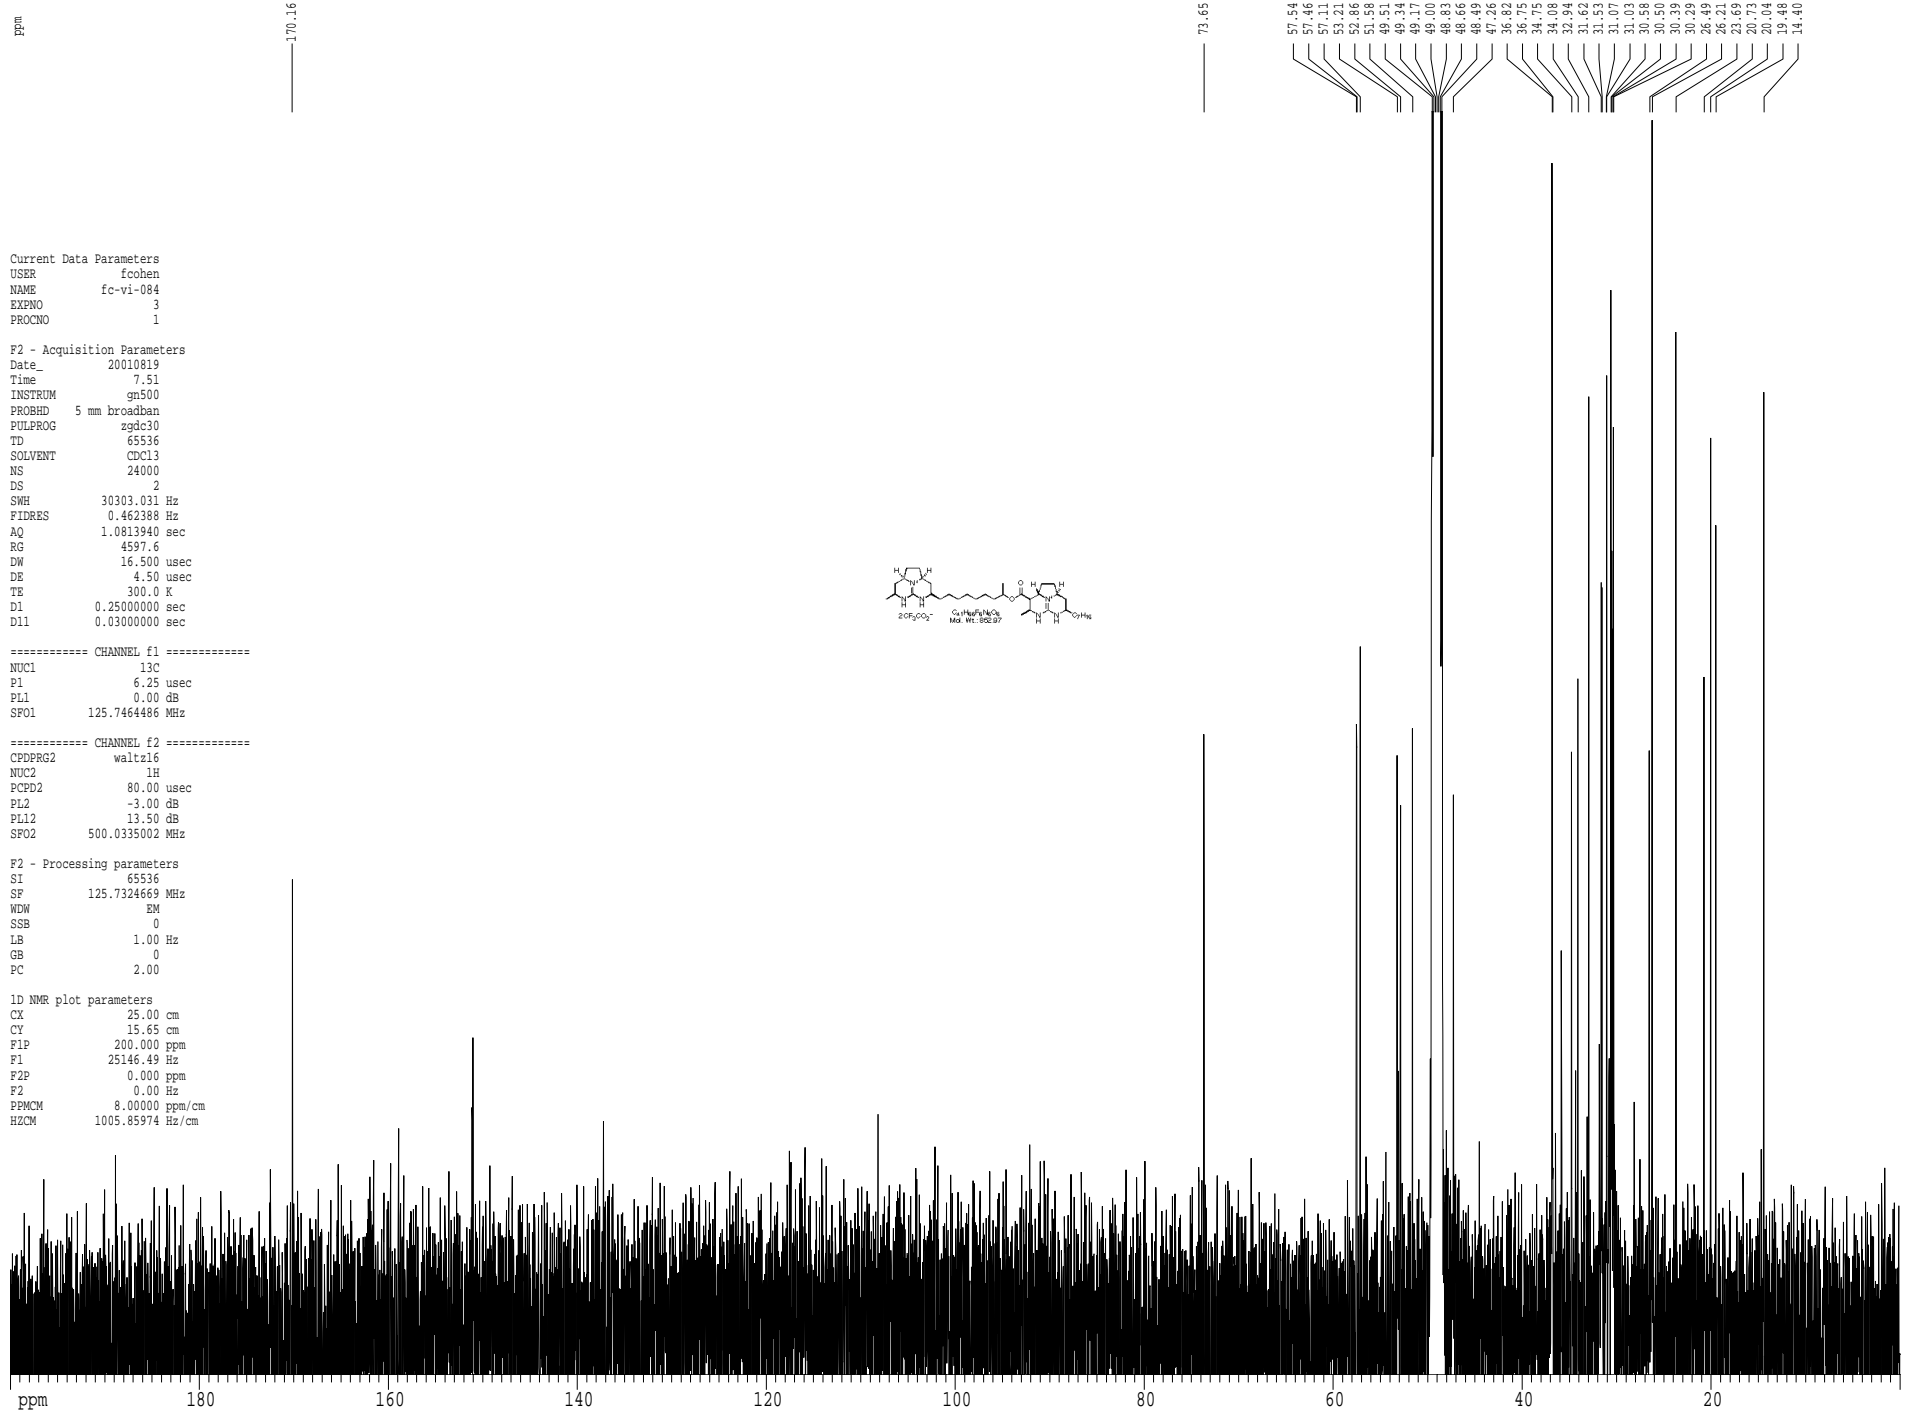

Current Data Parameters  
USER fcohen  
NAME fc-vi-084  
EXPNO 3  
PROCNO 1

F2 - Acquisition Parameters  
Date\_ 20010819  
Time 7.51  
INSTRUM gn500  
PROBHD 5 mm broadband  
PULPROG zgdc30  
TD 65536  
SOLVENT CDCl3  
NS 24000  
DS 2  
SWH 30303.031 Hz  
FIDRES 0.462388 Hz  
AQ 1.0813940 sec  
RG 4597.6  
DW 16.500 usec  
DE 4.50 usec  
TE 300.0 K  
D1 0.25000000 sec  
D11 0.03000000 sec

==== CHANNEL f1 =====  
NUC1 13C  
P1 6.25 usec  
PL1 0.00 dB  
SFO1 125.746486 MHz

==== CHANNEL f2 =====  
CPDPRG2 waltz16  
NUC2 1H  
PCPD2 80.00 usec  
PL2 -3.00 dB  
PL12 13.50 dB  
SFO2 500.0335002 MHz

F2 - Processing parameters  
SI 65536  
SF 125.7324669 MHz  
WDW EM  
SSB 0  
LB 1.00 Hz  
GB 0  
PC 2.00

1D NMR plot parameters  
CX 25.00 cm  
CY 15.65 cm  
FIP 200.000 ppm  
F1 25146.49 Hz  
F2P 0.000 ppm  
F2 0.00 Hz  
PPMCM 8.00000 ppm/cm  
HZCM 1005.85974 Hz/cm

## 1H spectrum

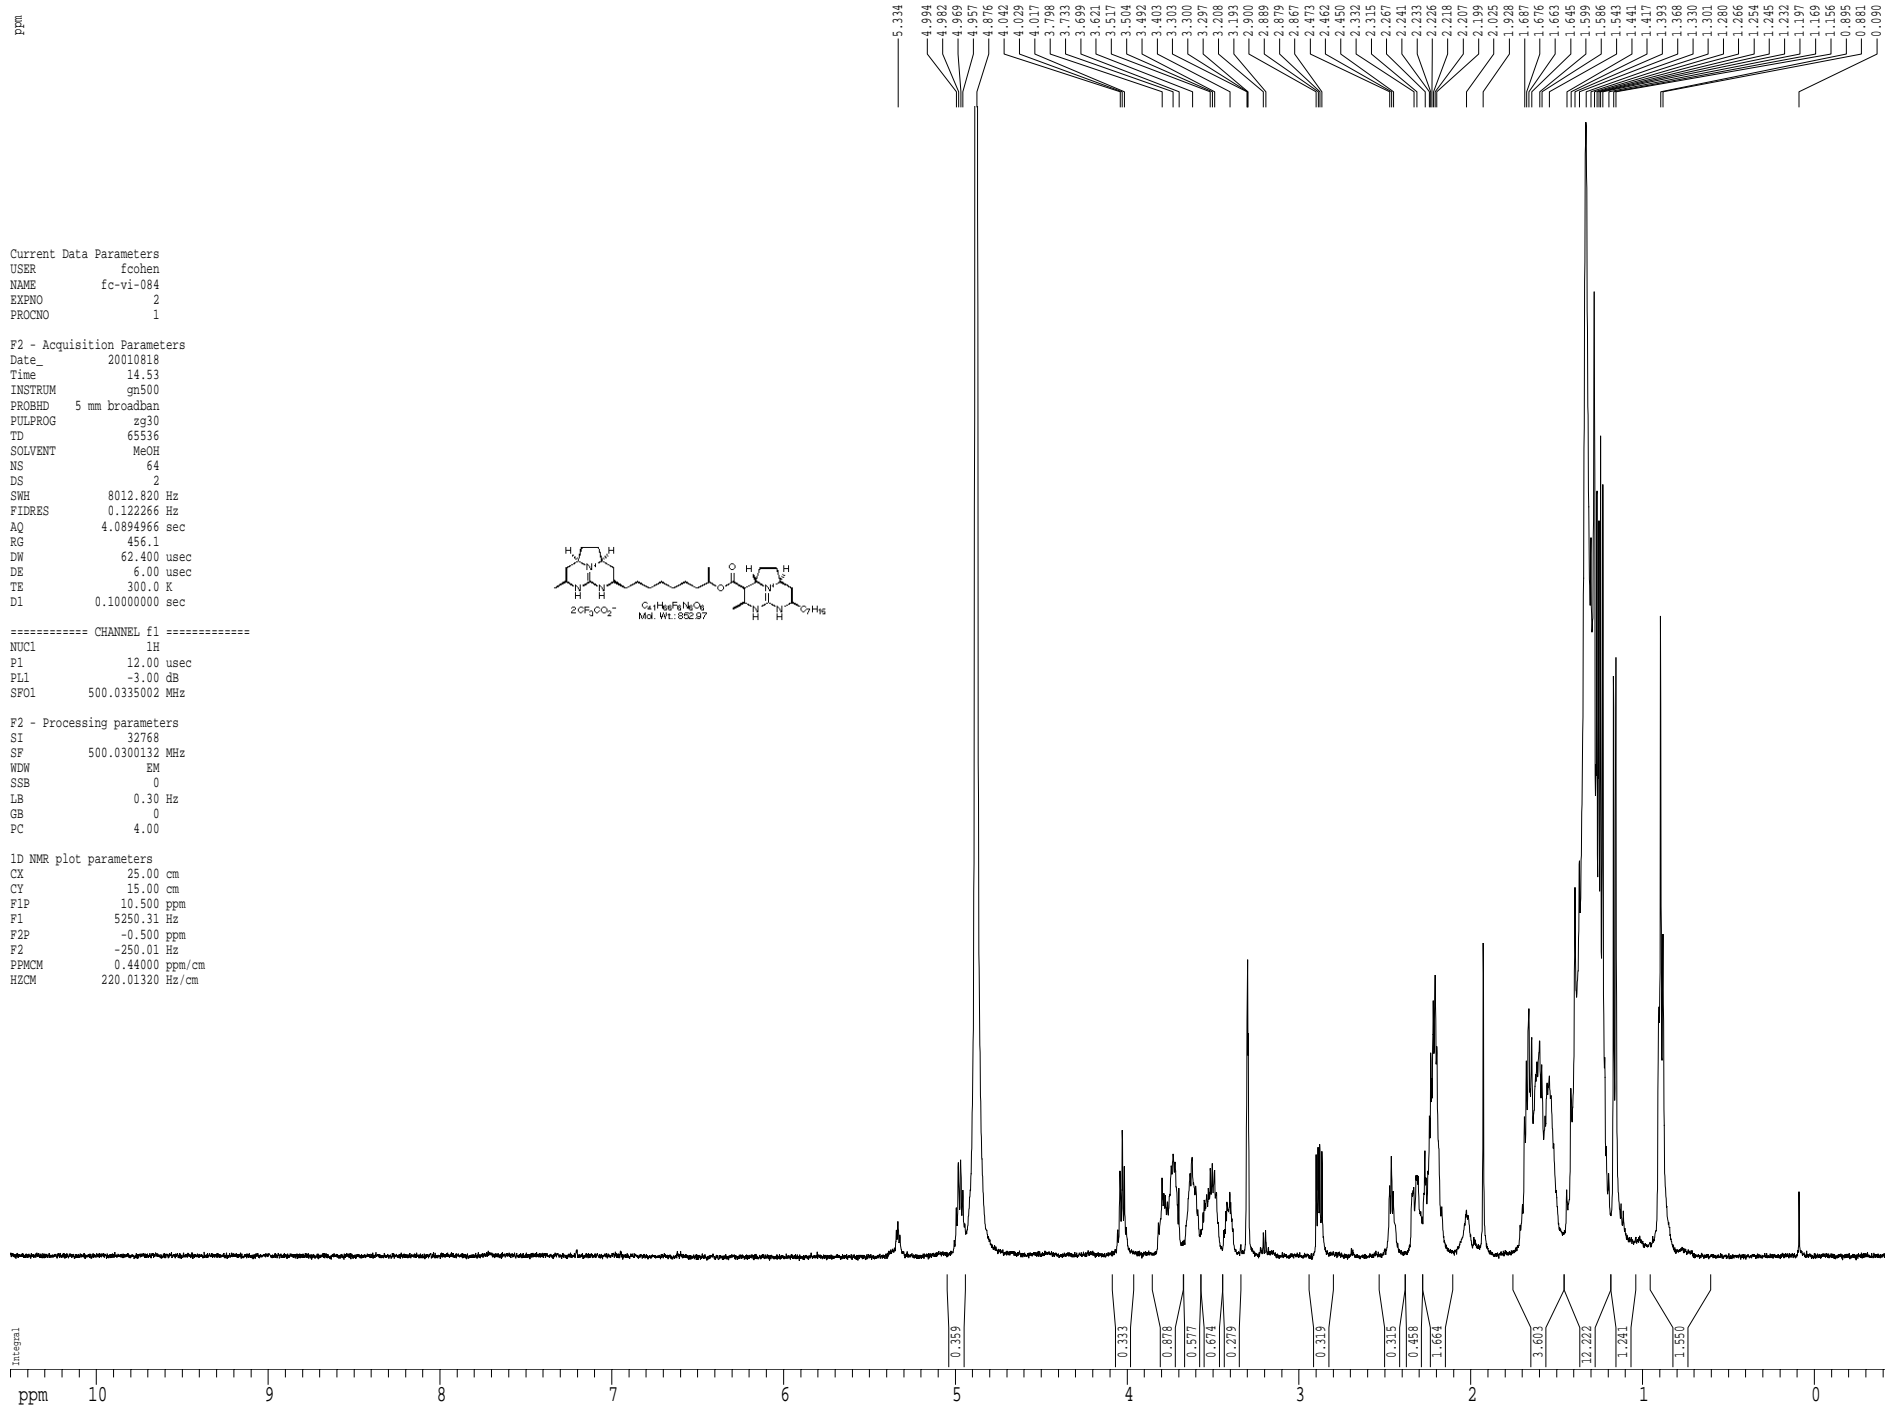

Supplement: NIHMS63171-supplement-1si20051031_05.pdf [file NIHMS63171-supplement-1si20051031_05.pdf]
